# Supplementary material for: Ball milling synthesis of S-quinolyl xanthates via coupling of haloquinolines with potassium O-alkyl xanthates
Source: Royal Society of Chemistry journal article supplement (doi:10.1039/d3ob01688a), 2023-01-01
Supplement: d3ob01688a1.pdf [file d3ob01688a1.pdf]

# Supporting Information

## Ball milling synthesis of *S*-quinolyl xanthates *via* coupling of haloquinolines with potassium *O*-alkyl xanthates

Sha Peng <sup>a</sup>, Meng-Yang Zhao <sup>a</sup>, Jia-Jun Tang <sup>a</sup> and Long-Yong Xie\* <sup>a</sup>

<sup>a</sup> College of Chemistry and Bioengineering, Hunan University of Science and Engineering, Yongzhou  
425100, China;

*E-mail:* longyongxie@yeah.net

### Table of Content

|                                                                    |            |
|--------------------------------------------------------------------|------------|
| <b>1. General information</b>                                      | <b>S2</b>  |
| <b>2. Experimental Section</b>                                     | <b>S2</b>  |
| <b>3. Characterization data of products</b>                        | <b>S4</b>  |
| <b>4. References</b>                                               | <b>S16</b> |
| <b>5. <sup>1</sup>H and <sup>13</sup>C NMR spectra of products</b> | <b>S17</b> |

## 1. General information

Unless otherwise specified, all reagents and solvents were obtained from commercial suppliers and used without further purification.  $^1\text{H}$ ,  $^{13}\text{C}$  and  $^{19}\text{F}$  NMR spectra were recorded at 400, 100 and 376 MHz, respectively. Chemical shifts were quoted in ppm relative to  $\text{CDCl}_3$  ( $\delta_{\text{H}} = 7.26$ ,  $\delta_{\text{C}} = 77.0$  ppm). Data are reported as follows: s = singlet, d = doublet, t = triplet, q = quartet, m = multiplet, dd = doublet of doublet, etc. The reactions were monitored by thin-layer chromatography (TLC) using GF254 silica gel-coated TLC plates. Mass spectra were performed on a spectrometer operating on ESI-TOF. Melting points were measured on a melting point apparatus and were uncorrected.

## 2. Experimental Section

### General procedure for the preparation of *O*-alkyl xanthates **2**

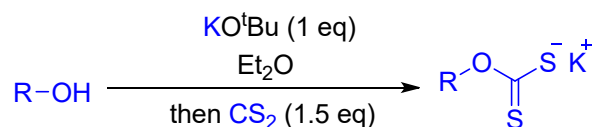

*O*-alkyl xanthates **2** were synthesized according to Wu's work.<sup>1</sup> In a  $\text{N}_2$ -filled glovebox, an oven-dried 50 mL round-bottom flask equipped with a magnetic stir bar was charged sequentially with alcohol (2.0 mmol, 1.0 equiv.),  $\text{KO}^t\text{Bu}$  (2.0 mmol, 1.0 equiv.), and dry  $\text{Et}_2\text{O}$  (20 mL). The flask was sealed with a septum cap and transferred out of the glovebox, and a balloon was attached. The reaction mixture was stirred at room temperature for 30 minutes, followed by the addition of  $\text{CS}_2$  (3.0 mmol, 1.5 equiv.) via syringe and continued to be stirred for 3 hours at room temperature. The precipitate formed was collected by filtration, washed with  $\text{Et}_2\text{O}$  ( $2 \times 10$  mL), and dried in vacuo to afford the desired product.

### General procedure for the preparation of *S*-quinolyl xanthates

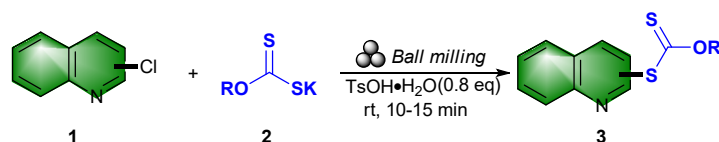

A mixture of chlorinated quinoline **1** (0.5 mmol, 1 eq), *O*-alkyl xanthate **2** (0.75 mmol, 1.5 eq) and *p*-toluene sulfonic acid (0.4 mmol, 0.8 eq) were milled in a stainless steel jar charged with 1 ball (10 mm) of the same material at 20 Hz for 10 – 15 min. After completion, ethyl acetate (10 mL) and water (10

mL) were added to the mixture, the organic layer was separated and the aqueous layer was further extracted with ethyl acetate ( $2 \times 10$  mL). The combined organic layers were dried with anhydrous  $\text{Na}_2\text{SO}_4$ , filtered and concentrated under reduced pressure. The resulting organic residue was purified by flash chromatography column over silica gel to afford the desired S-quinolyl xanthates **3**.

#### Gram-scale synthesis of **3aa**

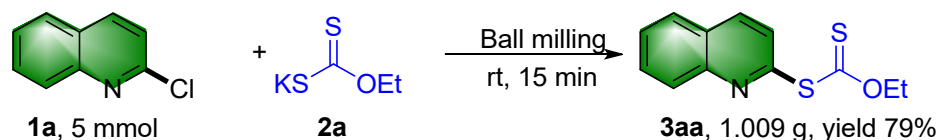

A mixture of 2-chloroquinoline **1a** (5 mmol, 0.815 g), potassium *O*-ethyl xanthate **2a** (7.5 mmol, 1.199 g) and *p*-toluene sulfonic acid (4 mmol, 0.761 g) were milled in a stainless steel jar charged with 1 ball (10 mm) of the same material at 20Hz for 15 min. After completion, ethyl acetate (30 mL) and water (30 mL) were added to the mixture, the organic layer was separated and the aqueous layer was further extracted with ethyl acetate ( $2 \times 20$  mL). The combined organic layers were dried with anhydrous  $\text{Na}_2\text{SO}_4$ , filtered and concentrated under reduced pressure. The resulting organic residue was purified by flash chromatography column over silica gel to afford 1.009 g of **3aa**, isolated yield 79%.

#### Synthesis of **4a** via hydrolysis of **3aa**

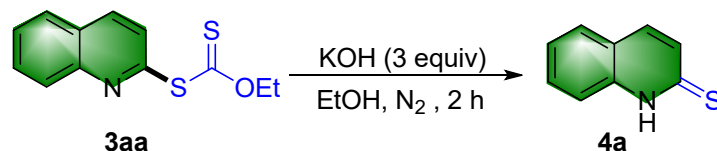

The experiment was carried out according to Karchava's work.<sup>2</sup> *O*-ethyl S-quinolin-2-yl carbonodithioate **3aa** (0.5 mmol, 0.1245 g) and KOH (1.5 mmol, 0.271 g) were dissolved in anhydrous ethanol (5 mL), the mixture was stirred at room temperature under  $\text{N}_2$  atmosphere for 2 h. After completion,  $\text{CH}_2\text{Cl}_2$  (10 mL) and water (10 mL) were added to the mixture, the organic layer was separated and the aqueous layer was further extracted with  $\text{CH}_2\text{Cl}_2$  ( $2 \times 10$  mL). The combined organic layers were dried with anhydrous  $\text{Na}_2\text{SO}_4$ , filtered and concentrated under reduced pressure. The resulting organic residue was purified by flash chromatography column over silica gel (EA/PE 1:4 - 1:2) to afford 0.070 g of **4a**, isolated yield 87%.

#### Synthesis of **5a** via the release of carbonyl sulfide from **3aa**

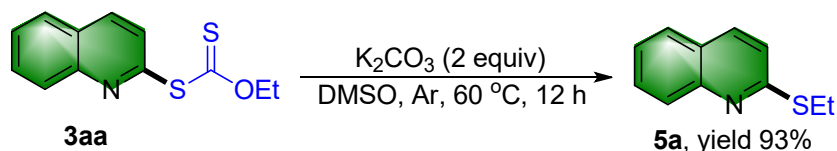

The experiment was carried out according to Wang's work.<sup>3</sup> *O*-ethyl *S*-quinolin-2-yl carbonodithioate **3aa** (0.5 mmol, 0.1245 g) and  $K_2CO_3$  (1 mmol, 0.138 g) were dissolved in DMSO (5 mL), the mixture was stirred at 60 °C under argon atmosphere for 12 h. After completion,  $CH_2Cl_2$  (10 mL) and water (10 mL) were added to the mixture, the organic layer was separated and the aqueous layer was further extracted with  $CH_2Cl_2$  ( $2 \times 10$  mL). The combined organic layers were dried with anhydrous  $Na_2SO_4$ , filtered and concentrated under reduced pressure. The resulting organic residue was purified by flash chromatography column over silica gel (EA/PE 1:20- 1:10) to afford 0.088 g of **5a**, isolated yield 93%.

#### Synthesis of **6a** via the coupling of **3aa** with 1-(4-bromophenyl)ethanone

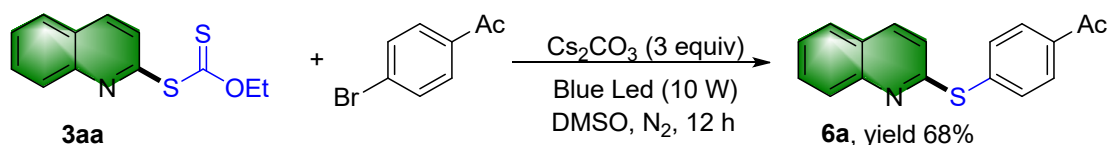

The experiment was carried out according to Karchava's work.<sup>2</sup> *O*-ethyl *S*-quinolin-2-yl carbonodithioate **3aa** (0.5 mmol, 0.1245 g), 1-(4-bromophenyl)ethanone (0.75 mmol, 0.148 g) and  $Cs_2CO_3$  (1.5 mmol, 0.489 g) were dissolved in DMSO (5 mL), the reaction mixture was stirred at room temperature under the irradiation of 10 W blue LED lamps (440 – 445 nm) and  $N_2$  atmosphere for 12 h. After completion,  $CH_2Cl_2$  (10 mL) and water (10 mL) were added to the mixture, the organic layer was separated and the aqueous layer was further extracted with  $CH_2Cl_2$  ( $2 \times 10$  mL). The combined organic layers were dried with anhydrous  $Na_2SO_4$ , filtered and concentrated under reduced pressure. The resulting organic residue was purified by flash chromatography column over silica gel (EA/PE 1:10- 1:6) to afford 0.095 g of **6a**, isolated yield 68%.

### 3. Characterization data of products

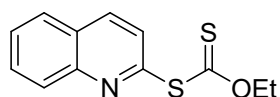

***O*-ethyl *S*-quinolin-2-yl carbonodithioate (3aa):** Yellow oil (105.8 mg, 85%).  $^1H$  NMR (400 MHz,  $CDCl_3$ )  $\delta$  8.18 (d,  $J = 8.5$  Hz, 1H), 8.12 (d,  $J = 8.5$  Hz, 1H), 7.85 (d,  $J = 8.1$  Hz, 1H), 7.75 (t,  $J = 7.6$  Hz, 1H), 7.69 (d,  $J = 8.5$  Hz, 1H), 7.61 (t,  $J = 7.5$  Hz, 1H), 4.63 (q,  $J = 7.1$  Hz, 2H), 1.32 (t,  $J = 7.1$  Hz,

3H);  $^{13}\text{C}$  NMR (100 MHz,  $\text{CDCl}_3$ )  $\delta$  210.5, 153.0, 148.3, 137.0, 130.2, 129.5, 127.8, 127.6, 127.3, 127.2, 70.3, 13.5; HRMS (ESI):  $m/z$   $[\text{M}+\text{H}]^+$  calcd for  $\text{C}_{12}\text{H}_{12}\text{NOS}_2$ : 250.0355; found: 250.0357.

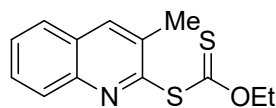

**O-ethyl S-(3-methylquinolin-2-yl) carbonodithioate (3ba):** Yellow oil (99.9 mg, 76%).  $^1\text{H}$  NMR (400 MHz,  $\text{CDCl}_3$ )  $\delta$  8.10 (d,  $J = 8.5$  Hz, 1H), 8.03 (s, 1H), 7.76 (d,  $J = 8.1$  Hz, 1H), 7.67 (t,  $J = 7.5$  Hz, 1H), 7.56 (t,  $J = 7.4$  Hz, 1H), 4.57 (q,  $J = 7.0$  Hz, 2H), 2.58 (s, 3H), 1.26 (t,  $J = 7.0$  Hz, 3H);  $^{13}\text{C}$  NMR (100 MHz,  $\text{CDCl}_3$ )  $\delta$  210.4, 153.0, 147.1, 137.1, 134.9, 129.3, 129.2, 128.4, 127.9, 126.7, 70.2, 20.2, 13.5; HRMS (ESI):  $m/z$   $[\text{M}+\text{H}]^+$  calcd for  $\text{C}_{13}\text{H}_{14}\text{NOS}_2$ : 264.0511; found: 264.0512.

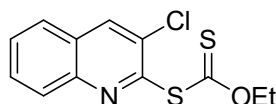

**O-ethyl S-(3-chloroquinolin-2-yl) carbonodithioate (3ca):** Yellow oil (90.5 mg, 64%).  $^1\text{H}$  NMR (400 MHz, Chloroform-*d*)  $\delta$  8.26 (s, 1H), 8.11 (d,  $J = 8.4$  Hz, 1H), 7.83 – 7.69 (m, 2H), 7.63 (t,  $J = 7.5$  Hz, 1H), 4.58 (q,  $J = 7.1$  Hz, 2H), 1.26 (t,  $J = 7.1$  Hz, 3H);  $^{13}\text{C}$  NMR (100 MHz, Chloroform-*d*)  $\delta$  208.7, 150.9, 146.5, 136.3, 132.6, 130.4, 129.7, 129.0, 128.6, 126.7, 70.6, 13.5; HRMS (ESI):  $m/z$   $[\text{M}+\text{H}]^+$  calcd for  $\text{C}_{12}\text{H}_{11}\text{ClNOS}_2$ : 283.9965; found: 283.9968.

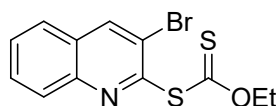

**O-ethyl S-(3-bromoquinolin-2-yl) carbonodithioate (3da):** Yellow oil (101.4 mg, 62%).  $^1\text{H}$  NMR (400 MHz, Chloroform-*d*)  $\delta$  8.47 (s, 1H), 8.12 (d,  $J = 8.5$  Hz, 1H), 7.77 (t,  $J = 7.7$  Hz, 2H), 7.64 (t,  $J = 7.5$  Hz, 1H), 4.60 (q,  $J = 7.1$  Hz, 2H), 1.28 (t,  $J = 7.1$  Hz, 3H);  $^{13}\text{C}$  NMR (100 MHz, Chloroform-*d*)  $\delta$  208.7, 152.1, 146.9, 140.1, 130.5, 129.7, 128.9, 128.7, 126.5, 122.8, 70.5, 13.5; HRMS (ESI):  $m/z$   $[\text{M}+\text{H}]^+$  calcd for  $\text{C}_{12}\text{H}_{11}\text{BrNOS}_2$ : 327.9459; found: 327.9462.

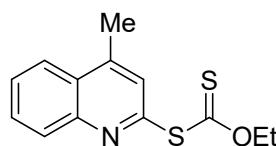

**O-ethyl S-(4-methylquinolin-2-yl) carbonodithioate (3ea):** Yellow oil (96.0 mg, 73%).  $^1\text{H}$  NMR (400 MHz, Chloroform-*d*)  $\delta$  8.12 (d,  $J = 8.4$  Hz, 1H), 8.00 (d,  $J = 8.3$  Hz, 1H), 7.74 (t,  $J = 7.6$  Hz, 1H), 7.62 (t,  $J = 7.6$  Hz, 1H), 7.53 (s, 1H), 4.63 (q,  $J = 7.1$  Hz, 2H), 2.72 (s, 3H), 1.32 (t,  $J = 7.1$  Hz, 3H);  $^{13}\text{C}$  NMR (100 MHz,  $\text{CDCl}_3$ )  $\delta$  210.7, 152.6, 148.1, 145.6, 130.1, 129.8, 127.6, 127.5, 127.4, 123.8, 70.2, 18.7, 13.5. HRMS (ESI):  $m/z$   $[\text{M}+\text{H}]^+$  calcd for  $\text{C}_{12}\text{H}_{12}\text{NOS}_2$ : 264.0511; found: 264.0513.

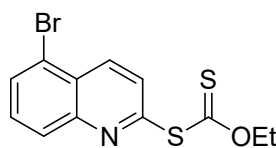

**O-ethyl S-(5-bromoquinolin-2-yl) carbonodithioate (3fa):** Yellow oil (109.5 mg, 67%).  $^1\text{H}$  NMR (400 MHz, Chloroform-*d*)  $\delta$  8.53 (d,  $J = 8.8$  Hz, 1H), 8.07 (d,  $J = 8.5$  Hz, 1H), 7.85 (d,  $J = 7.5$  Hz, 1H), 7.78 (d,  $J = 8.7$  Hz, 1H), 7.58 (t,  $J = 8.0$  Hz, 1H), 4.64 (q,  $J = 7.1$  Hz, 2H), 1.34 (t,  $J = 7.1$  Hz, 3H).  $^{13}\text{C}$

NMR (100 MHz, CDCl<sub>3</sub>)  $\delta$  209.7, 154.3, 148.8, 136.4, 131.4, 130.4, 129.4, 128.1, 126.8, 121.7, 70.5, 13.5. HRMS (ESI):  $m/z$  [M+H]<sup>+</sup> calcd for C<sub>12</sub>H<sub>11</sub>BrNOS<sub>2</sub>: 327.9459; found: 327.9461.

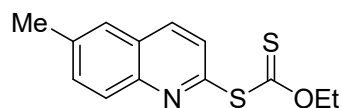

**O-ethyl S-(6-methylquinolin-2-yl) carbonodithioate (3ga):** Yellow oil (101.3 mg, 77%). <sup>1</sup>H NMR (400 MHz, CDCl<sub>3</sub>)  $\delta$  8.08 (d,  $J$  = 8.5 Hz, 1H), 8.01 (d,  $J$  = 8.5 Hz, 1H), 7.63 (d,  $J$  = 8.5 Hz, 1H), 7.58 (d,  $J$  = 12.7 Hz, 2H), 4.62 (q,  $J$  = 7.1 Hz, 2H), 2.54 (s, 3H), 1.31 (t,  $J$  = 7.1 Hz, 3H); <sup>13</sup>C NMR (100 MHz, CDCl<sub>3</sub>)  $\delta$  210.8, 151.8, 147.0, 138.0, 136.3, 132.4, 129.2, 127.3, 127.2, 126.4, 70.3, 21.6, 13.5; HRMS (ESI):  $m/z$  [M+H]<sup>+</sup> calcd for C<sub>12</sub>H<sub>12</sub>NOS<sub>2</sub>: 264.0511; found: 264.0514.

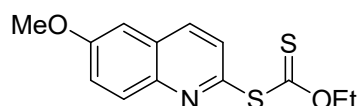

**O-ethyl S-(6-methoxyquinolin-2-yl) carbonodithioate (3ha):** Yellow oil (100.5 mg, 72%). <sup>1</sup>H NMR (400 MHz, CDCl<sub>3</sub>)  $\delta$  8.06 (d,  $J$  = 8.5 Hz, 1H), 8.00 (d,  $J$  = 9.2 Hz, 1H), 7.61 (d,  $J$  = 8.5 Hz, 1H), 7.38 (dd,  $J$  = 9.2, 2.3 Hz, 1H), 7.07 (d,  $J$  = 2.1 Hz, 1H), 4.61 (q,  $J$  = 7.1 Hz, 2H), 3.92 (s, 3H), 1.30 (t,  $J$  = 7.1 Hz, 3H); <sup>13</sup>C NMR (100 MHz, CDCl<sub>3</sub>)  $\delta$  211.2, 158.8, 149.7, 144.5, 135.7, 131.0, 128.6, 127.7, 122.9, 104.9, 70.3, 55.6, 13.5; HRMS (ESI):  $m/z$  [M+H]<sup>+</sup> calcd for C<sub>13</sub>H<sub>14</sub>NO<sub>2</sub>S<sub>2</sub>: 280.0460; found: 280.0464.

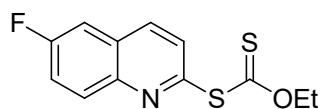

**O-ethyl S-(6-fluoroquinolin-2-yl) carbonodithioate (3ia):** Yellow oil (94.8 mg, 71%). <sup>1</sup>H NMR (400 MHz, CDCl<sub>3</sub>)  $\delta$  8.13 (t,  $J$  = 8.5 Hz, 2H), 7.71 (d,  $J$  = 8.5 Hz, 1H), 7.56 – 7.43 (m, 2H), 4.63 (q,  $J$  = 7.1 Hz, 2H), 1.33 (t,  $J$  = 7.1 Hz, 3H); <sup>13</sup>C NMR (100 MHz, CDCl<sub>3</sub>)  $\delta$  210.4, 161.2 (d,  $J_{C-F}$  = 249.1 Hz), 152.4 (d,  $J_{C-F}$  = 2.9 Hz), 145.4, 136.3 (d,  $J_{C-F}$  = 5.4 Hz), 132.2 (d,  $J_{C-F}$  = 9.3 Hz), 128.2 (d,  $J_{C-F}$  = 10.3 Hz), 128.0, 120.5 (d,  $J_{C-F}$  = 25.7 Hz), 110.7 (d,  $J_{C-F}$  = 21.9 Hz), 70.4, 13.5; <sup>19</sup>F NMR (376 MHz, CDCl<sub>3</sub>)  $\delta$  -110.76; HRMS (ESI):  $m/z$  [M+H]<sup>+</sup> calcd for C<sub>12</sub>H<sub>11</sub>FNOS<sub>2</sub>: 268.0261; found: 268.0262.

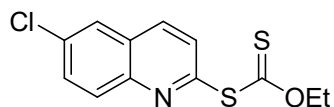

**S-(6-chloroquinolin-2-yl) O-ethyl carbonodithioate (3ja):** Yellow oil (103.3 mg, 73%). <sup>1</sup>H NMR (400 MHz, CDCl<sub>3</sub>)  $\delta$  8.10 (d,  $J$  = 8.5 Hz, 1H), 8.06 (d,  $J$  = 9.0 Hz, 1H), 7.83 (s, 1H), 7.70 (dd,  $J$  = 13.7, 8.8 Hz, 2H), 4.64 (q,  $J$  = 7.1 Hz, 2H), 1.34 (t,  $J$  = 7.1 Hz, 3H); <sup>13</sup>C NMR (100 MHz, CDCl<sub>3</sub>)  $\delta$  210.1, 153.5, 146.7, 135.9, 133.7, 131.1, 128.1, 127.9, 126.3, 70.5, 13.6; HRMS (ESI):  $m/z$  [M+H]<sup>+</sup> calcd for C<sub>12</sub>H<sub>11</sub>ClNOS<sub>2</sub>: 283.9965; found: 283.9963.

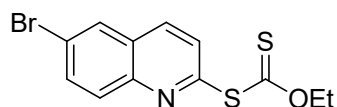

**S-(6-bromoquinolin-2-yl) O-ethyl carbonodithioate (3ka):** Yellow oil (104.6 mg, 64%). <sup>1</sup>H NMR (400 MHz, CDCl<sub>3</sub>)  $\delta$  8.09 (d,  $J$  = 8.3 Hz, 1H), 7.98 (d,  $J$  = 14.2 Hz, 2H), 7.80 (d,  $J$  = 8.8 Hz, 1H), 7.71 (d,  $J$  = 8.3 Hz, 1H), 4.63 (q,  $J$  = 6.4 Hz, 2H), 1.33 (t,  $J$  = 6.6 Hz, 3H); <sup>13</sup>C NMR (100 MHz, CDCl<sub>3</sub>)  $\delta$

210.0, 153.7, 146.8, 135.8, 133.7, 131.2, 129.6, 128.3, 128.0, 121.9, 70.5, 13.5; HRMS (ESI):  $m/z$   $[M+H]^+$  calcd for  $C_{12}H_{11}BrNOS_2$ : 327.9460; found: 327.9462.

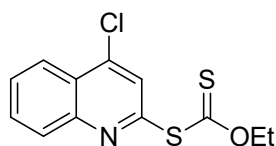

**S-(4-chloroquinolin-2-yl) O-ethyl carbonodithioate (3la):** Yellow oil (103.3 mg, 73%).  $^1H$  NMR (400 MHz,  $CDCl_3$ )  $\delta$  8.22 (d,  $J = 8.4$  Hz, 1H), 8.12 (d,  $J = 8.4$  Hz, 1H), 7.84 – 7.75 (m, 2H), 7.69 (t,  $J = 7.6$  Hz, 1H), 4.64 (q,  $J = 7.1$  Hz, 2H), 1.35 (t,  $J = 7.1$  Hz, 3H);  $^{13}C$  NMR (100 MHz,  $CDCl_3$ )  $\delta$  209.3, 152.8, 148.7, 142.9, 131.0, 129.8, 128.7, 126.7, 125.5, 124.0, 70.5, 13.5; HRMS (ESI):  $m/z$   $[M+H]^+$  calcd for  $C_{12}H_{11}ClNOS_2$ : 283.9965; found: 283.9968.

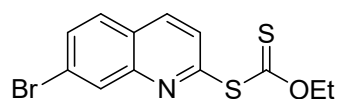

**S-(7-bromoquinolin-2-yl) O-ethyl carbonodithioate (3ma):** Yellow oil (111.2 mg, 68%).  $^1H$  NMR (400 MHz,  $CDCl_3$ )  $\delta$  8.17 (d,  $J = 8.5$  Hz, 1H), 8.08 (d,  $J = 7.2$  Hz, 1H), 7.81 (d,  $J = 8.2$  Hz, 1H), 7.76 (d,  $J = 8.5$  Hz, 1H), 7.45 (t,  $J = 7.8$  Hz, 1H), 4.66 (q,  $J = 7.1$  Hz, 2H), 1.36 (t,  $J = 7.1$  Hz, 3H);  $^{13}C$  NMR (100 MHz,  $CDCl_3$ )  $\delta$  209.9, 154.9, 145.4, 137.2, 133.8, 128.6, 128.1, 127.8, 127.4, 124.9, 70.4, 13.6; HRMS (ESI):  $m/z$   $[M+H]^+$  calcd for  $C_{12}H_{11}BrNOS_2$ : 327.9460; found: 327.9457.

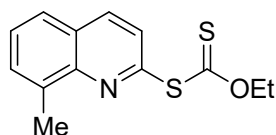

**O-ethyl S-(8-methylquinolin-2-yl) carbonodithioate (3na):** Yellow oil (107.8 mg, 82%).  $^1H$  NMR (400 MHz,  $CDCl_3$ )  $\delta$  8.14 (d,  $J = 8.5$  Hz, 1H), 7.68 (d,  $J = 8.6$  Hz, 2H), 7.59 (d,  $J = 7.0$  Hz, 1H), 7.49 (t,  $J = 7.6$  Hz, 1H), 4.66 (q,  $J = 7.2$  Hz, 2H), 2.80 (s, 3H), 1.35 (t,  $J = 7.1$  Hz, 3H);  $^{13}C$  NMR (100 MHz,  $CDCl_3$ )  $\delta$  210.9, 152.1, 147.5, 137.7, 137.0, 130.2, 127.5, 127.3, 126.6, 125.5, 70.2, 17.8, 13.6; HRMS (ESI):  $m/z$   $[M+H]^+$  calcd for  $C_{13}H_{14}NOS_2$ : 264.0511; found: 264.0511.

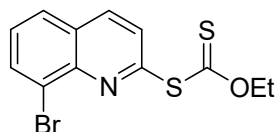

**S-(8-bromoquinolin-2-yl) O-ethyl carbonodithioate (3oa):** Yellow oil (91.5 mg, 56%).  $^1H$  NMR (400 MHz,  $CDCl_3$ )  $\delta$  8.17 (d,  $J = 8.5$  Hz, 1H), 8.08 (d,  $J = 7.2$  Hz, 1H), 7.81 (d,  $J = 8.2$  Hz, 1H), 7.76 (d,  $J = 8.5$  Hz, 1H), 7.45 (t,  $J = 7.8$  Hz, 1H), 4.66 (q,  $J = 7.1$  Hz), 1.36 (t,  $J = 7.1$  Hz, 3H);  $^{13}C$  NMR (100 MHz,  $CDCl_3$ )  $\delta$  209.9, 154.8, 145.4, 137.2, 133.8, 128.6, 128.1, 127.8, 127.4, 124.9, 70.4, 13.6; HRMS (ESI):  $m/z$   $[M+H]^+$  calcd for  $C_{12}H_{11}BrNOS_2$ : 327.9460; found: 327.9466.

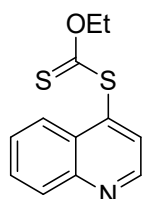

**O-ethyl S-quinolin-4-yl carbonodithioate (3pa):** Yellow oil (95.9 mg, 77%). <sup>1</sup>H NMR (400 MHz, CDCl<sub>3</sub>) δ 8.93 (d, *J* = 3.9 Hz, 1H), 8.18 (dd, *J* = 22.0, 8.4 Hz, 2H), 7.75 (t, *J* = 7.6 Hz, 1H), 7.60 (t, *J* = 7.1 Hz, 2H), 4.51 (q, *J* = 7.0 Hz, 2H), 1.13 (t, *J* = 7.1 Hz, 3H); <sup>13</sup>C NMR (100 MHz, CDCl<sub>3</sub>) δ 208.8, 149.8, 148.7, 137.7, 130.0, 130.0, 128.5, 127.9, 127.7, 125.2, 70.6, 13.3; HRMS (ESI): *m/z* [M+H]<sup>+</sup> calcd for C<sub>12</sub>H<sub>12</sub>NOS<sub>2</sub>: 250.0355; found: 250.0357.

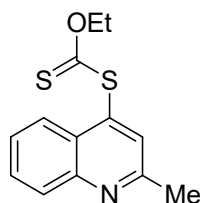

**O-ethyl S-(2-methylquinolin-4-yl) carbonodithioate (3qa):** Yellow oil (113.1 mg, 86%). <sup>1</sup>H NMR (400 MHz, CDCl<sub>3</sub>) δ 8.13 (d, *J* = 8.3 Hz, 1H), 8.05 (d, *J* = 8.4 Hz, 1H), 7.70 (t, *J* = 7.6 Hz, 1H), 7.57 – 7.48 (m, 2H), 4.51 (q, *J* = 7.1 Hz, 2H), 2.75 (s, 3H), 1.13 (t, *J* = 7.1 Hz, 3H); <sup>13</sup>C NMR (100 MHz, CDCl<sub>3</sub>) δ 209.1, 158.6, 148.4, 137.6, 129.9, 129.2, 128.7, 126.7, 126.6, 125.0, 70.5, 25.1, 13.3; HRMS (ESI): *m/z* [M+H]<sup>+</sup> calcd for C<sub>13</sub>H<sub>14</sub>NOS<sub>2</sub>: 264.0511; found: 264.0507.

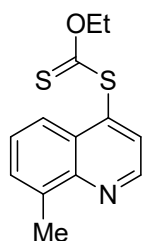

**O-ethyl S-(8-methylquinolin-4-yl) carbonodithioate (3ra):** Yellow oil (99.9 mg, 76%). <sup>1</sup>H NMR (400 MHz, CDCl<sub>3</sub>) δ 8.98 – 8.88 (m, 1H), 8.08 (d, *J* = 8.3 Hz, 1H), 7.60 (t, *J* = 6.3 Hz, 2H), 7.48 (t, *J* = 7.6 Hz, 1H), 4.53 (q, *J* = 7.0 Hz, 2H), 2.83 (s, 3H), 1.16 (t, *J* = 7.1 Hz, 3H); <sup>13</sup>C NMR (100 MHz, CDCl<sub>3</sub>) δ 209.2, 147.9, 148.5, 137.8, 137.7, 130.2, 128.5, 127.7, 127.3, 123.3, 70.5, 18.4, 13.3; HRMS (ESI): *m/z* [M+H]<sup>+</sup> calcd for C<sub>13</sub>H<sub>14</sub>NOS<sub>2</sub>: 264.0511; found: 264.0509.

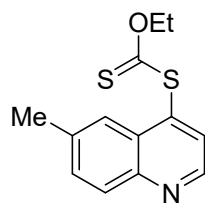

**O-ethyl S-(6-methylquinolin-4-yl) carbonodithioate (3sa):** Yellow oil (101.3 mg, 77%). <sup>1</sup>H NMR (400 MHz, CDCl<sub>3</sub>) δ 8.77 (d, *J* = 4.3 Hz, 1H), 7.96 (d, *J* = 8.6 Hz, 1H), 7.88 (s, 1H), 7.49 (d, *J* = 5.0 Hz, 2H), 4.46 (q, *J* = 7.1 Hz, 2H), 2.46 (s, 3H), 1.08 (t, *J* = 7.1 Hz, 3H); <sup>13</sup>C NMR (100 MHz, CDCl<sub>3</sub>) δ 209.2, 148.9, 147.5, 138.0, 136.9, 132.3, 129.8, 128.5, 128.1, 124.0, 70.6, 21.9, 13.4; HRMS (ESI): *m/z* [M+H]<sup>+</sup> calcd for C<sub>13</sub>H<sub>14</sub>NOS<sub>2</sub>: 264.0511; found: 264.0514.

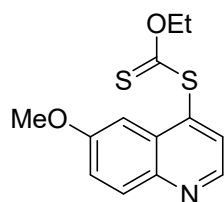



***O*-ethyl *S*-(6-methoxyquinolin-4-yl) carbonodithioate (3ta):** Yellow oil (101.8 mg, 73%). <sup>1</sup>H NMR (400 MHz, CDCl<sub>3</sub>) δ 8.77 (d, *J* = 3.6 Hz, 1H), 8.03 (d, *J* = 9.1 Hz, 1H), 7.57 (d, *J* = 3.9 Hz, 1H), 7.47 – 7.34 (m, 2H), 4.53 (q, *J* = 7.1 Hz, 2H), 3.91 (s, 3H), 1.17 (t, *J* = 7.1 Hz, 3H); <sup>13</sup>C NMR (100 MHz, CDCl<sub>3</sub>) δ 208.8, 158.7, 147.1, 145.0, 135.9, 131.6, 129.9, 128.3, 122.8, 102.7, 70.5, 55.6, 13.4; HRMS (ESI): *m/z* [M+H]<sup>+</sup> calcd for C<sub>13</sub>H<sub>14</sub>NO<sub>2</sub>S<sub>2</sub>: 280.0460; found: 280.0465.

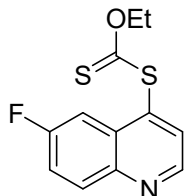

***O*-ethyl *S*-(6-fluoroquinolin-4-yl) carbonodithioate (3ua):** Yellow oil (109.5 mg, 82%). <sup>1</sup>H NMR (400 MHz, CDCl<sub>3</sub>) δ 8.89 (d, *J* = 4.4 Hz, 1H), 8.15 (dd, *J* = 9.2, 5.4 Hz, 1H), 7.82 (dd, *J* = 9.7, 2.6 Hz, 1H), 7.63 (d, *J* = 4.3 Hz, 1H), 7.56 – 7.47 (m, 1H), 4.54 (q, *J* = 7.1 Hz, 2H), 1.18 (t, *J* = 7.1 Hz, 3H); <sup>13</sup>C NMR (100 MHz, CDCl<sub>3</sub>) δ 208.3, 161.2 (d, *J*<sub>C-F</sub> = 248.6 Hz), 149.1 (d, *J*<sub>C-F</sub> = 2.9 Hz), 145.9, 137.2 (d, *J*<sub>C-F</sub> = 5.9 Hz), 132.7 (d, *J*<sub>C-F</sub> = 9.2 Hz), 129.9 (d, *J*<sub>C-F</sub> = 10.3 Hz), 128.7, 120.3 (d, *J*<sub>C-F</sub> = 25.7 Hz), 108.9 (d, *J*<sub>C-F</sub> = 23.8 Hz), 70.7, 13.3; <sup>19</sup>F NMR (376 MHz, CDCl<sub>3</sub>) δ -110.25; HRMS (ESI): *m/z* [M+H]<sup>+</sup> calcd for C<sub>12</sub>H<sub>11</sub>FNOS<sub>2</sub>: 268.0261; found: 268.0263.

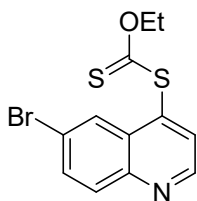

***O*-ethyl *S*-(6-bromoquinolin-4-yl) carbonodithioate (3va):** Yellow oil (137.3 mg, 84%). <sup>1</sup>H NMR (400 MHz, CDCl<sub>3</sub>) δ 8.92 (d, *J* = 4.3 Hz, 1H), 8.35 (d, *J* = 1.4 Hz, 1H), 8.00 (d, *J* = 8.9 Hz, 1H), 7.80 (dd, *J* = 8.9 Hz, 1.4 Hz, 1H), 7.62 (d, *J* = 4.3 Hz, 1H), 4.55 (q, *J* = 7.1 Hz, 2H), 1.20 (t, *J* = 7.1 Hz, 3H); <sup>13</sup>C NMR (100 MHz, CDCl<sub>3</sub>) δ 208.1, 150.2, 147.4, 136.8, 133.5, 131.7, 129.7, 128.8, 127.5, 122.2, 70.8, 13.4; HRMS (ESI): *m/z* [M+H]<sup>+</sup> calcd for C<sub>12</sub>H<sub>11</sub>BrNOS<sub>2</sub>: 327.9460; found: 327.9455.

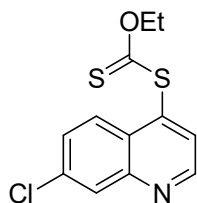

***O*-ethyl *S*-(7-chloroquinolin-4-yl) carbonodithioate (3wa):** Yellow oil (117.4 mg, 83%). <sup>1</sup>H NMR (400 MHz, CDCl<sub>3</sub>) δ 8.93 (d, *J* = 4.3 Hz, 1H), 8.31 – 8.06 (m, 1H), 7.60 (d, *J* = 4.3 Hz, 1H), 7.54 (d, *J* = 9.0 Hz, 1H), 4.53 (q, *J* = 7.1 Hz, 2H), 1.17 (t, *J* = 7.1 Hz, 3H); <sup>13</sup>C NMR (100 MHz, CDCl<sub>3</sub>) δ 208.3, 151.0, 149.1, 137.9, 135.9, 128.9, 128.6, 128.1, 127.1, 126.8, 70.7, 13.4; HRMS (ESI): *m/z* [M+H]<sup>+</sup> calcd for C<sub>12</sub>H<sub>11</sub>ClNOS<sub>2</sub>: 283.9965; found: 283.9967.

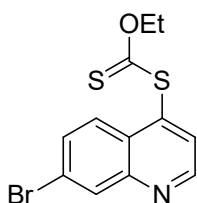

**O-ethyl S-(7-bromoquinolin-4-yl) carbonodithioate (3xa):** Yellow oil (143.9 mg, 88%). <sup>1</sup>H NMR (400 MHz, CDCl<sub>3</sub>) δ 9.02 – 8.86 (m, 1H), 8.32 (s, 1H), 8.07 (d, *J* = 8.9 Hz, 1H), 7.67 (d, *J* = 8.9 Hz, 1H), 7.62 (d, *J* = 4.2 Hz, 1H), 4.52 (q, *J* = 7.1 Hz, 2H), 1.17 (t, *J* = 7.1 Hz, 3H); <sup>13</sup>C NMR (100 MHz, CDCl<sub>3</sub>) δ 208.2, 150.9, 149.3, 138.0, 132.3, 131.1, 128.2, 127.3, 126.8, 124.2, 70.7, 13.4; HRMS (ESI): *m/z* [M+H]<sup>+</sup> calcd for C<sub>12</sub>H<sub>11</sub>BrNOS<sub>2</sub>: 327.9460; found: 327.9464.

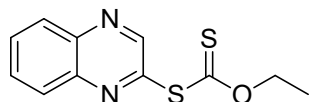

**O-ethyl S-quinoxalin-2-yl carbonodithioate (3ya):** Yellow oil (97.5 mg, 78%). <sup>1</sup>H NMR (400 MHz, CDCl<sub>3</sub>) δ 8.99 (s, 1H), 8.10 (t, *J* = 6.3 Hz, 2H), 7.84 – 7.75 (m, 2H), 4.63 (q, *J* = 7.1 Hz, 2H), 1.34 (t, *J* = 7.1 Hz, 3H); <sup>13</sup>C NMR (100 MHz, CDCl<sub>3</sub>) δ 209.0, 149.6, 142.4, 141.0, 131.1, 130.6, 129.4, 129.2, 70.8, 13.5; HRMS (ESI): *m/z* [M+H]<sup>+</sup> calcd for C<sub>11</sub>H<sub>11</sub>N<sub>2</sub>OS<sub>2</sub>: 251.0307; found: 251.0308.

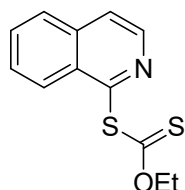

**O-ethyl S-isoquinolin-1-yl carbonodithioate (3za):** Yellow oil (79.1 mg, 63%). <sup>1</sup>H NMR (400 MHz, CDCl<sub>3</sub>) δ 8.60 (d, *J* = 5.5 Hz, 1H), 8.38 (d, *J* = 8.4 Hz, 1H), 7.89 (d, *J* = 8.2 Hz, 1H), 7.79 – 7.71 (m, 2H), 7.67 (t, *J* = 7.6 Hz, 1H), 4.51 (q, *J* = 7.0 Hz, 2H), 1.13 (t, *J* = 7.0 Hz, 3H); <sup>13</sup>C NMR (100 MHz, CDCl<sub>3</sub>) δ 210.2, 153.2, 142.8, 137.1, 130.9, 130.7, 128.5, 127.2, 127.1, 122.8, 70.3, 13.4; HRMS (ESI): *m/z* [M+H]<sup>+</sup> calcd for C<sub>12</sub>H<sub>12</sub>NOS<sub>2</sub>: 250.0355; found: 250.0358.

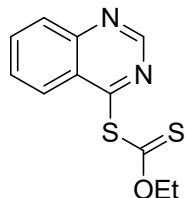

**O-ethyl S-quinazolin-4-yl carbonodithioate (4aa):** Yellow oil (95.0 mg, 76%). <sup>1</sup>H NMR (400 MHz, CDCl<sub>3</sub>) δ 8.74 (d, *J* = 8.2 Hz, 1H), 8.27 (s, 1H), 7.80 (t, *J* = 7.5 Hz, 1H), 7.72 (d, *J* = 8.0 Hz, 1H), 7.56 (t, *J* = 7.6 Hz, 1H), 4.76 (q, *J* = 7.1 Hz, 2H), 1.52 (t, *J* = 7.1 Hz, 3H); <sup>13</sup>C NMR (100 MHz, CDCl<sub>3</sub>) δ 191.6, 184.6, 141.6, 141.6, 135.1, 129.9, 129.8, 129.2, 128.3, 72.3, 13.1; HRMS (ESI): *m/z* [M+H]<sup>+</sup> calcd for C<sub>11</sub>H<sub>11</sub>N<sub>2</sub>OS<sub>2</sub>: 251.0307; found: 251.0309.

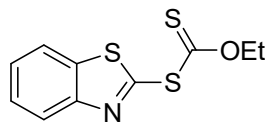

**S-benzo[d]thiazol-2-yl O-ethyl carbonodithioate (4ba):** Yellow oil (43.3 mg, 34%). <sup>1</sup>H NMR (400 MHz, CDCl<sub>3</sub>) δ 8.09 (d, *J* = 8.1 Hz, 1H), 7.91 (d, *J* = 7.9 Hz, 1H), 7.49 (dt, *J* = 25.5, 7.4 Hz, 2H), 4.71 (q, *J* = 7.1 Hz, 2H), 1.43 (t, *J* = 7.1 Hz, 3H); <sup>13</sup>C NMR (100 MHz, CDCl<sub>3</sub>) δ 206.1, 157.9, 152.4, 137.5, 126.6, 126.1, 123.8, 121.3, 71.2, 13.6; HRMS (ESI): *m/z* [M+H]<sup>+</sup> calcd for C<sub>10</sub>H<sub>10</sub>NOS<sub>3</sub>: 255.9919; found: 255.9923.

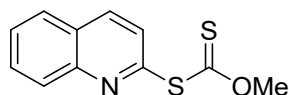

**O-methyl S-quinolin-2-yl carbonodithioate (3ab):** Yellow oil (97.5 mg, 83%).  $^1\text{H}$  NMR (400 MHz,  $\text{CDCl}_3$ )  $\delta$  8.20 (d,  $J = 8.5$  Hz, 1H), 8.13 (d,  $J = 8.5$  Hz, 1H), 7.85 (d,  $J = 8.1$  Hz, 1H), 7.76 (t,  $J = 7.7$  Hz, 1H), 7.70 (d,  $J = 8.5$  Hz, 1H), 7.62 (t,  $J = 7.5$  Hz, 1H), 4.14 (s, 3H);  $^{13}\text{C}$  NMR (100 MHz,  $\text{CDCl}_3$ )  $\delta$  211.4, 152.9, 148.4, 137.2, 130.2, 129.6, 127.9, 127.6, 127.4, 127.1, 60.4; HRMS (ESI):  $m/z$   $[\text{M}+\text{H}]^+$  calcd for  $\text{C}_{11}\text{H}_{10}\text{NOS}_2$ : 236.0198; found: 236.0199.

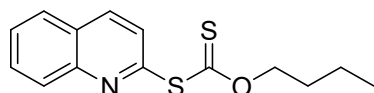

**O-butyl S-quinolin-2-yl carbonodithioate (3ac):** Yellow oil (113.6 mg, 82%).  $^1\text{H}$  NMR (400 MHz,  $\text{CDCl}_3$ )  $\delta$  8.16 (d,  $J = 8.5$  Hz, 1H), 8.10 (d,  $J = 8.5$  Hz, 1H), 7.82 (d,  $J = 8.1$  Hz, 1H), 7.73 (t,  $J = 7.7$  Hz, 1H), 7.66 (d,  $J = 8.5$  Hz, 1H), 7.58 (t,  $J = 7.5$  Hz, 1H), 4.53 (t,  $J = 6.5$  Hz, 2H), 1.66 – 1.58 (m, 2H), 1.29 – 1.18 (m, 2H), 0.79 (t,  $J = 7.4$  Hz, 3H);  $^{13}\text{C}$  NMR (100 MHz,  $\text{CDCl}_3$ )  $\delta$  210.3, 152.8, 148.2, 136.9, 130.1, 129.4, 127.7, 127.5, 127.2, 127.0, 74.1, 29.8, 18.8, 13.4; HRMS (ESI):  $m/z$   $[\text{M}+\text{H}]^+$  calcd for  $\text{C}_{14}\text{H}_{16}\text{NOS}_2$ : 278.0668; found: 278.0671.

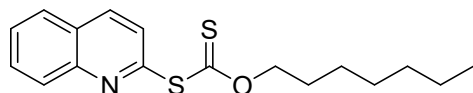

**O-heptyl S-quinolin-2-yl carbonodithioate (3ad):** Yellow oil (118.1 mg, 74%).  $^1\text{H}$  NMR (400 MHz,  $\text{CDCl}_3$ )  $\delta$  8.18 (d,  $J = 8.5$  Hz, 1H), 8.13 (d,  $J = 8.5$  Hz, 1H), 7.85 (d,  $J = 8.1$  Hz, 1H), 7.76 (t,  $J = 7.7$  Hz, 1H), 7.69 (d,  $J = 8.5$  Hz, 1H), 7.61 (t,  $J = 7.5$  Hz, 1H), 4.54 (t,  $J = 6.4$  Hz, 2H), 1.70 – 1.58 (m, 2H), 1.25 – 1.12 (m, 8H), 0.82 (t,  $J = 7.0$  Hz, 3H);  $^{13}\text{C}$  NMR (100 MHz,  $\text{CDCl}_3$ )  $\delta$  210.4, 152.8, 148.4, 136.9, 130.2, 129.6, 127.8, 127.5, 127.3, 127.2, 74.5, 31.5, 28.7, 28.0, 25.7, 22.4, 14.0; HRMS (ESI):  $m/z$   $[\text{M}+\text{H}]^+$  calcd for  $\text{C}_{17}\text{H}_{22}\text{NOS}_2$ : 320.1137; found: 320.1139.

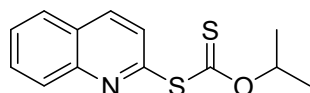

**O-isopropyl S-quinolin-2-yl carbonodithioate (3ae):** Yellow oil (119.7 mg, 91%).  $^1\text{H}$  NMR (400 MHz,  $\text{CDCl}_3$ )  $\delta$  8.17 (d,  $J = 8.4$  Hz, 1H), 8.12 (d,  $J = 8.5$  Hz, 1H), 7.84 (d,  $J = 8.1$  Hz, 1H), 7.74 (t,  $J = 7.6$  Hz, 1H), 7.67 (d,  $J = 8.4$  Hz, 1H), 7.60 (t,  $J = 7.4$  Hz, 1H), 5.77 – 5.68 (m, 1H), 1.32 (d,  $J = 6.2$  Hz, 6H);  $^{13}\text{C}$  NMR (100 MHz,  $\text{CDCl}_3$ )  $\delta$  209.7, 153.2, 148.2, 136.8, 130.1, 129.5, 127.7, 127.5, 127.2, 127.2, 78.6, 21.1; HRMS (ESI):  $m/z$   $[\text{M}+\text{H}]^+$  calcd for  $\text{C}_{13}\text{H}_{14}\text{NOS}_2$ : 264.0511; found: 264.0506.

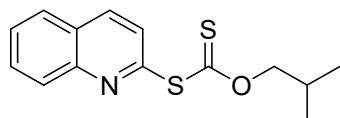

**O-isobutyl S-quinolin-2-yl carbonodithioate (3af):** Yellow oil (101.1 mg, 73%).  $^1\text{H}$  NMR (400 MHz,  $\text{CDCl}_3$ )  $\delta$  8.19 (d,  $J = 8.4$  Hz, 1H), 8.13 (d,  $J = 8.4$  Hz, 1H), 7.85 (d,  $J = 8.1$  Hz, 1H), 7.76 (t,  $J = 7.6$  Hz, 1H), 7.70 (d,  $J = 8.4$  Hz, 1H), 7.61 (t,  $J = 7.4$  Hz, 1H), 4.32 (d,  $J = 6.3$  Hz, 2H), 2.02 – 1.88 (m, 1H), 0.80 (d,  $J = 6.7$  Hz, 6H);  $^{13}\text{C}$  NMR (100 MHz,  $\text{CDCl}_3$ )  $\delta$  210.4, 152.6, 148.3, 137.0, 130.2, 129.5,

127.9, 127.5, 127.3, 127.2, 80.3, 27.4, 18.9; HRMS (ESI):  $m/z$   $[M+H]^+$  calcd for  $C_{14}H_{16}NOS_2$ : 278.0668; found: 278.0666.

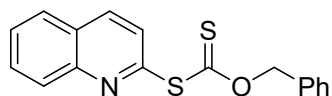

**O-benzyl S-quinolin-2-yl carbonodithioate (3ag):** Yellow oil (102.6 mg, 66%).  $^1H$  NMR (400 MHz,  $CDCl_3$ )  $\delta$  8.02 (d,  $J = 8.4$  Hz, 2H), 7.72 (d,  $J = 8.1$  Hz, 1H), 7.65 (t,  $J = 7.7$  Hz, 1H), 7.55 (d,  $J = 8.4$  Hz, 1H), 7.50 (t,  $J = 7.5$  Hz, 1H), 7.22 – 7.08 (m, 5H), 5.49 (s, 2H);  $^{13}C$  NMR (100 MHz,  $CDCl_3$ )  $\delta$  210.3, 152.7, 148.4, 137.0, 134.0, 130.2, 129.5, 128.6, 128.4, 128.2, 127.8, 127.5, 127.3, 127.1, 75.3; HRMS (ESI):  $m/z$   $[M+H]^+$  calcd for  $C_{17}H_{14}NOS_2$ : 312.0511; found: 312.0514.

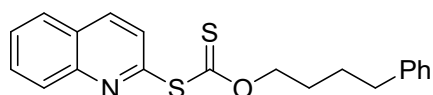

**O-(4-phenylbutyl) S-quinolin-2-yl carbonodithioate (3ah):** Yellow oil (146.5 mg, 83%).  $^1H$  NMR (400 MHz,  $CDCl_3$ )  $\delta$  8.17 – 7.99 (m, 2H), 7.76 (d,  $J = 8.1$  Hz, 1H), 7.67 (t,  $J = 7.7$  Hz, 1H), 7.63 – 7.49 (m, 2H), 7.11 (dt,  $J = 25.9, 7.5$  Hz, 3H), 6.94 (d,  $J = 7.3$  Hz, 2H), 4.49 (t,  $J = 6.3$  Hz, 2H), 2.42 (t,  $J = 7.6$  Hz, 2H), 1.62 (dt,  $J = 14.3, 6.4$  Hz, 2H), 1.51 – 1.41 (m, 2H);  $^{13}C$  NMR (100 MHz,  $CDCl_3$ )  $\delta$  210.4, 152.7, 148.3, 141.6, 137.0, 130.2, 129.6, 128.2, 128.2, 127.9, 127.5, 127.3, 127.1, 125.8, 74.2, 35.2, 27.6, 27.5; HRMS (ESI):  $m/z$   $[M+H]^+$  calcd for  $C_{20}H_{20}NOS_2$ : 354.0981; found: 354.0987.

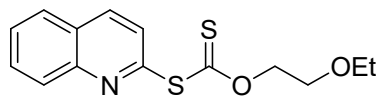

**O-(2-ethoxyethyl) S-quinolin-2-yl carbonodithioate (3ai):** Yellow oil (108.4 mg, 74%).  $^1H$  NMR (400 MHz,  $CDCl_3$ )  $\delta$  8.16 (d,  $J = 8.5$  Hz, 1H), 8.11 (d,  $J = 8.5$  Hz, 1H), 7.83 (d,  $J = 8.1$  Hz, 1H), 7.80 – 7.69 (m, 2H), 7.60 (t,  $J = 7.5$  Hz, 1H), 4.77 – 4.61 (m, 2H), 3.72 – 3.59 (m, 2H), 3.36 (q,  $J = 7.0$  Hz, 2H), 1.08 (t,  $J = 7.0$  Hz, 3H);  $^{13}C$  NMR (100 MHz,  $CDCl_3$ )  $\delta$  210.4, 153.1, 148.2, 136.9, 130.1, 129.5, 127.8, 127.5, 127.3, 127.1, 73.1, 67.3, 66.6, 15.0; HRMS (ESI):  $m/z$   $[M+H]^+$  calcd for  $C_{14}H_{16}NO_2S_2$ : 294.0617; found: 294.0622.

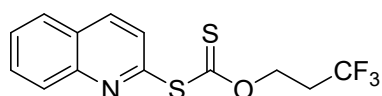

**O-(3,3,3-trifluoropropyl) S-quinolin-2-yl carbonodithioate (3aj):** Yellow oil (128.4 mg, 81%).  $^1H$  NMR (400 MHz,  $CDCl_3$ )  $\delta$  8.20 (d,  $J = 8.5$  Hz, 1H), 8.13 (d,  $J = 8.5$  Hz, 1H), 7.86 (d,  $J = 8.1$  Hz, 1H), 7.77 (t,  $J = 7.7$  Hz, 1H), 7.68 (d,  $J = 8.5$  Hz, 1H), 7.62 (t,  $J = 7.5$  Hz, 1H), 4.76 (t,  $J = 6.2$  Hz, 2H), 2.52 (qt,  $J = 10.7, 6.3$  Hz, 2H);  $^{13}C$  NMR (100 MHz,  $CDCl_3$ )  $\delta$  210.2, 152.2, 148.4, 137.3, 130.3, 129.5, 128.0, 127.6, 127.4, 127.1, 125.3 (q,  $J_{C-F} = 275.2$  Hz), 65.9 (q,  $J_{C-F} = 3.5$  Hz), 32.8 (q,  $J_{C-F} = 29.6$  Hz);  $^{19}F$  NMR (376 MHz,  $CDCl_3$ )  $\delta$  -64.93; HRMS (ESI):  $m/z$   $[M+H]^+$  calcd for  $C_{13}H_{11}F_3NOS_2$ : 318.0229; found: 318.0236.

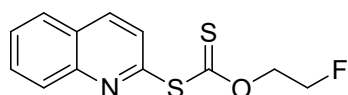

***O*-(2-fluoroethyl) *S*-quinolin-2-yl carbonodithioate (3ak):** Yellow oil (88.1 mg, 66%). <sup>1</sup>H NMR (400 MHz, CDCl<sub>3</sub>) δ 8.21 (d, *J* = 8.5 Hz, 1H), 8.13 (d, *J* = 8.5 Hz, 1H), 7.86 (d, *J* = 8.1 Hz, 1H), 7.81 – 7.69 (m, 2H), 7.62 (t, *J* = 7.5 Hz, 1H), 4.88 – 4.81 (m, 1H), 4.80 – 4.75 (m, 1H), 4.74 – 4.68 (m, 1H), 4.64 – 4.56 (m, 1H); <sup>13</sup>C NMR (100 MHz, CDCl<sub>3</sub>) δ 210.6, 152.8, 148.4, 137.2, 130.3, 129.5, 127.9, 127.6, 127.4, 127.1, 80.2 (d, *J*<sub>C-F</sub> = 171.4 Hz), 72.1 (d, *J*<sub>C-F</sub> = 19.9 Hz); HRMS (ESI): *m/z* [M+H]<sup>+</sup> calcd for C<sub>12</sub>H<sub>11</sub>FNOS<sub>2</sub>: 268.0261; found: 268.0263.

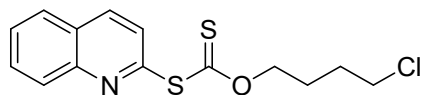

***O*-(4-chlorobutyl) *S*-quinolin-2-yl carbonodithioate (3al):** Yellow oil (110.4 mg, 71%). <sup>1</sup>H NMR (400 MHz, CDCl<sub>3</sub>) δ 8.21 (d, *J* = 8.5 Hz, 1H), 8.14 (d, *J* = 8.5 Hz, 1H), 7.87 (d, *J* = 8.1 Hz, 1H), 7.77 (t, *J* = 7.7 Hz, 1H), 7.69 (d, *J* = 8.4 Hz, 1H), 7.63 (t, *J* = 7.5 Hz, 1H), 4.59 (t, *J* = 6.1 Hz, 2H), 3.40 (t, *J* = 6.3 Hz, 2H), 1.88 – 1.80 (m, 2H), 1.75 – 1.67 (m, 2H); <sup>13</sup>C NMR (100 MHz, CDCl<sub>3</sub>) δ 210.4, 152.6, 148.4, 137.2, 130.3, 129.6, 128.0, 127.6, 127.4, 127.1, 73.2, 44.1, 28.9, 25.5; HRMS (ESI): *m/z* [M+H]<sup>+</sup> calcd for C<sub>14</sub>H<sub>15</sub>ClNOS<sub>2</sub>: 312.0278; found: 312.0282.

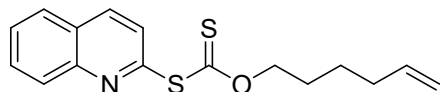

***O*-hex-5-en-1-yl *S*-quinolin-2-yl carbonodithioate (3am):** Yellow oil (115.2 mg, 76%). <sup>1</sup>H NMR (400 MHz, CDCl<sub>3</sub>) δ 8.17 (d, *J* = 8.5 Hz, 1H), 8.12 (d, *J* = 8.5 Hz, 1H), 7.84 (d, *J* = 8.1 Hz, 1H), 7.74 (t, *J* = 7.6 Hz, 1H), 7.67 (d, *J* = 8.5 Hz, 1H), 7.60 (t, *J* = 7.5 Hz, 1H), 5.61 (td, *J* = 16.9, 6.7 Hz, 1H), 4.95 – 4.83 (m, 2H), 4.54 (t, *J* = 6.4 Hz, 2H), 1.92 (q, *J* = 7.1 Hz, 2H), 1.66 (dt, *J* = 14.4, 6.6 Hz, 2H), 1.30 (q, *J* = 7.6 Hz, 2H); <sup>13</sup>C NMR (100 MHz, CDCl<sub>3</sub>) δ 210.3, 152.7, 148.3, 137.8, 137.0, 130.2, 129.5, 127.8, 127.5, 127.2, 127.1, 114.8, 74.2, 32.9, 27.3, 24.9; HRMS (ESI): *m/z* [M+H]<sup>+</sup> calcd for C<sub>16</sub>H<sub>18</sub>NOS<sub>2</sub>: 304.0824; found: 304.0827.

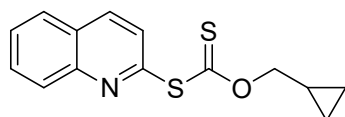

***O*-(cyclopropylmethyl) *S*-quinolin-2-yl carbonodithioate (3an):** Yellow oil (101.8 mg, 74%). <sup>1</sup>H NMR (400 MHz, CDCl<sub>3</sub>) δ 8.18 (d, *J* = 8.5 Hz, 1H), 8.12 (d, *J* = 8.5 Hz, 1H), 7.84 (d, *J* = 8.1 Hz, 1H), 7.79 – 7.69 (m, 2H), 7.60 (t, *J* = 7.5 Hz, 1H), 4.42 (d, *J* = 7.4 Hz, 2H), 1.19 (tt, *J* = 8.0, 4.8 Hz, 1H), 0.55 (q, *J* = 5.4 Hz, 2H), 0.28 (q, *J* = 5.1 Hz, 2H); <sup>13</sup>C NMR (100 MHz, CDCl<sub>3</sub>) δ 210.6, 153.2, 148.3, 136.9, 130.1, 129.5, 127.8, 127.5, 127.3, 127.2, 79.2, 9.1, 3.4; HRMS (ESI): *m/z* [M+H]<sup>+</sup> calcd for C<sub>14</sub>H<sub>14</sub>NOS<sub>2</sub>: 276.0511; found: 276.0508.

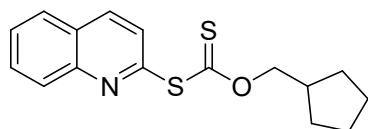

***O*-(cyclopentylmethyl) *S*-quinolin-2-yl carbonodithioate (3ao):** Yellow oil (130.3 mg, 86%). <sup>1</sup>H NMR (400 MHz, CDCl<sub>3</sub>) δ 8.17 (d, *J* = 8.5 Hz, 1H), 8.11 (d, *J* = 8.5 Hz, 1H), 7.84 (d, *J* = 8.1 Hz, 1H), 7.74 (t, *J* = 7.7 Hz, 1H), 7.68 (d, *J* = 8.4 Hz, 1H), 7.60 (t, *J* = 7.5 Hz, 1H), 4.42 (d, *J* = 6.9 Hz, 2H), 2.24 – 2.15 (m, 1H), 1.59 (dd, *J* = 11.8, 6.7 Hz, 2H), 1.42 (s, 4H), 1.13 (dt, *J* = 12.3, 7.3 Hz, 2H); <sup>13</sup>C

NMR (100 MHz, CDCl<sub>3</sub>) δ 210.3, 152.7, 148.3, 136.9, 130.1, 129.5, 127.8, 127.5, 127.2, 127.1, 78.1, 37.9, 29.1, 25.2; HRMS (ESI): m/z [M+H]<sup>+</sup> calcd for C<sub>16</sub>H<sub>18</sub>NOS<sub>2</sub>: 304.0824; found: 304.0826.

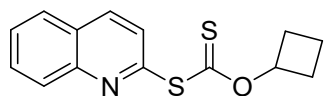

**O-cyclobutyl S-quinolin-2-yl carbonodithioate (3ap):** Yellow oil (107.3 mg, 78%). <sup>1</sup>H NMR (400 MHz, CDCl<sub>3</sub>) δ 8.18 (d, *J* = 8.5 Hz, 1H), 8.12 (d, *J* = 8.5 Hz, 1H), 7.84 (d, *J* = 8.1 Hz, 1H), 7.77 – 7.66 (m, 2H), 7.60 (t, *J* = 7.5 Hz, 1H), 5.55 – 5.46 (m, 1H), 2.47 – 2.36 (m, 2H), 5.55 – 5.46 (m, 2H), 1.85 – 1.74 (m, 1H), 1.66 – 1.55 (m, 1H); <sup>13</sup>C NMR (100 MHz, CDCl<sub>3</sub>) δ 208.8, 153.2, 148.2, 136.9, 130.1, 129.5, 127.8, 127.5, 127.2, 127.1, 77.8, 29.9, 13.5; HRMS (ESI): m/z [M+H]<sup>+</sup> calcd for C<sub>14</sub>H<sub>14</sub>NOS<sub>2</sub>: 276.0511; found: 276.0506.

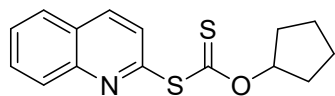

**O-cyclopentyl S-quinolin-2-yl carbonodithioate (3aq):** Yellow oil (124.3 mg, 86%). <sup>1</sup>H NMR (400 MHz, CDCl<sub>3</sub>) δ 8.18 (d, *J* = 8.5 Hz, 1H), 8.12 (d, *J* = 8.5 Hz, 1H), 7.84 (d, *J* = 8.1 Hz, 1H), 7.75 (t, *J* = 7.6 Hz, 1H), 7.66 (d, *J* = 8.5 Hz, 1H), 7.61 (t, *J* = 7.5 Hz, 1H), 5.92 – 5.77 (m, 1H), 1.90 – 1.75 (m, 4H), 1.61 – 1.45 (m, 4H); <sup>13</sup>C NMR (100 MHz, CDCl<sub>3</sub>) δ 209.4, 153.1, 148.3, 136.8, 130.2, 129.5, 127.8, 127.5, 127.2, 127.0, 88.0, 32.4, 23.7; HRMS (ESI): m/z [M+H]<sup>+</sup> calcd for C<sub>15</sub>H<sub>16</sub>NOS<sub>2</sub>: 290.0668; found: 290.0667.

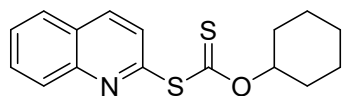

**O-cyclohexyl S-quinolin-2-yl carbonodithioate (3ar):** Yellow oil (125.8 mg, 83%). <sup>1</sup>H NMR (400 MHz, CDCl<sub>3</sub>) δ 8.18 (d, *J* = 8.5 Hz, 1H), 8.12 (d, *J* = 8.5 Hz, 1H), 7.84 (d, *J* = 8.1 Hz, 1H), 7.75 (t, *J* = 7.6 Hz, 1H), 7.68 (d, *J* = 8.5 Hz, 1H), 7.60 (t, *J* = 7.4 Hz, 1H), 5.59 – 5.52 (m, 1H), 1.93 – 1.79 (m, 2H), 1.60 – 1.17 (m, 8H); <sup>13</sup>C NMR (100 MHz, CDCl<sub>3</sub>) δ 209.4, 153.0, 148.3, 136.8, 130.1, 129.5, 127.7, 127.5, 127.2, 127.1, 82.9, 30.5, 25.0, 23.0; HRMS (ESI): m/z [M+H]<sup>+</sup> calcd for C<sub>16</sub>H<sub>18</sub>NOS<sub>2</sub>: 304.0824; found: 304.0827.

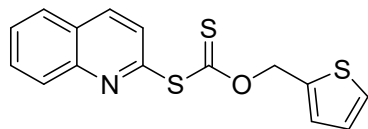

**O-(thiophen-2-ylmethyl) S-quinolin-2-yl carbonodithioate (3as):** Yellow oil (101.4 mg, 64%). <sup>1</sup>H NMR (400 MHz, CDCl<sub>3</sub>) δ 8.19 (d, *J* = 8.5 Hz, 1H), 8.10 (d, *J* = 8.5 Hz, 1H), 7.85 (d, *J* = 8.1 Hz, 1H), 7.75 (t, *J* = 8.0 Hz, 2H), 7.60 (t, *J* = 7.5 Hz, 1H), 7.20 (d, *J* = 5.1 Hz, 1H), 6.99 (s, 1H), 6.91 (t, *J* = 4.1 Hz, 1H), 4.47 (s, 2H); <sup>13</sup>C NMR (100 MHz, CDCl<sub>3</sub>) δ 186.9, 151.3, 148.5, 138.6, 137.2, 130.3, 129.4, 127.8, 127.6, 127.5, 127.3, 127.0, 126.4, 125.7, 29.7; HRMS (ESI): m/z [M+H]<sup>+</sup> calcd for C<sub>15</sub>H<sub>12</sub>NOS<sub>3</sub>: 318.0076; found: 318.0079.

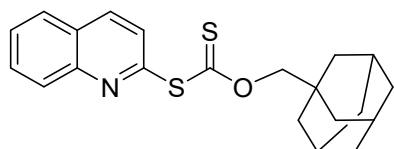

**O-(adamantan-1-ylmethyl) S-quinolin-2-yl carbonodithioate (3at):** Yellow oil (144.0 mg, 78%). <sup>1</sup>H NMR (400 MHz, CDCl<sub>3</sub>) δ 8.21 (d, *J* = 8.4 Hz, 1H), 8.15 (d, *J* = 8.5 Hz, 1H), 7.86 (d, *J* = 8.1 Hz, 1H), 7.77 (t, *J* = 7.7 Hz, 1H), 7.71 (d, *J* = 8.4 Hz, 1H), 7.62 (t, *J* = 7.5 Hz, 1H), 4.03 (s, 2H), 1.79 – 1.71 (m, 3H), 1.60 – 1.49 (m, 3H), 1.33 – 1.20 (m, 9H); <sup>13</sup>C NMR (100 MHz, CDCl<sub>3</sub>) δ 210.1, 152.0, 148.4, 137.1, 130.3, 129.6, 128.0, 127.5, 127.4, 127.4, 83.7, 38.8, 36.5, 33.3, 27.7; HRMS (ESI): *m/z* [M+H]<sup>+</sup> calcd for C<sub>21</sub>H<sub>24</sub>NOS<sub>2</sub>: 370.1294; found: 370.1299.

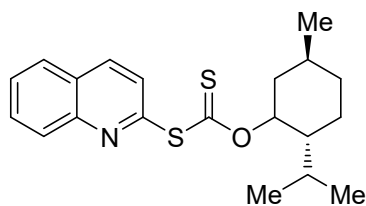

**O-((2R,5S)-2-isopropyl-5-methylcyclohexyl) S-quinolin-2-yl carbonodithioate (3au):** Yellow oil (129.3 mg, 72%). <sup>1</sup>H NMR (400 MHz, CDCl<sub>3</sub>) δ 8.18 (d, *J* = 8.5 Hz, 1H), 8.12 (d, *J* = 8.5 Hz, 1H), 7.84 (d, *J* = 8.1 Hz, 1H), 7.75 (t, *J* = 7.7 Hz, 1H), 7.69 (d, *J* = 8.5 Hz, 1H), 7.60 (t, *J* = 7.5 Hz, 1H), 5.45 (td, *J* = 10.8, 4.4 Hz, 1H), 2.28 – 2.20 (m, 1H), 1.84 – 1.74 (m, 1H), 1.69 – 1.58 (m, 2H), 1.52 – 1.34 (m, 2H), 1.10 – 0.72 (m, 12H); <sup>13</sup>C NMR (100 MHz, CDCl<sub>3</sub>) δ 209.9, 152.9, 148.3, 136.7, 130.1, 129.6, 127.8, 127.5, 127.3, 127.3, 85.0, 47.0, 39.4, 33.9, 31.2, 26.2, 23.4, 21.9, 20.5, 16.7; HRMS (ESI): *m/z* [M+H]<sup>+</sup> calcd for C<sub>20</sub>H<sub>26</sub>NOS<sub>2</sub>: 360.1450; found: 360.1457.

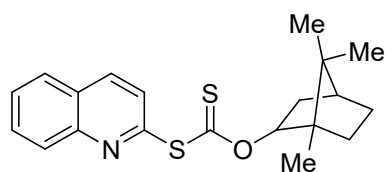

**O-1,7,7-trimethylbicyclo[2.2.1]heptan-2-yl S-quinolin-2-yl carbonodithioate (3av):** Yellow oil (150.0 mg, 84%). <sup>1</sup>H NMR (400 MHz, CDCl<sub>3</sub>) δ 8.20 (d, *J* = 8.4 Hz, 1H), 8.14 (d, *J* = 8.5 Hz, 1H), 7.86 (d, *J* = 8.1 Hz, 1H), 7.76 (t, *J* = 7.6 Hz, 1H), 7.70 (d, *J* = 8.4 Hz, 1H), 7.62 (t, *J* = 7.5 Hz, 1H), 5.42 (d, *J* = 9.5 Hz, 1H), 2.47 – 2.36 (m, 1H), 1.69 – 1.63 (m, 1H), 1.62 – 1.49 (m, 1H), 1.23 – 1.18 (m, 1H), 1.11 – 0.95 (m, 3H), 0.86 (s, 3H), 0.77 (d, *J* = 5.9 Hz, 6H); <sup>13</sup>C NMR (100 MHz, CDCl<sub>3</sub>) δ 210.0, 152.6, 148.4, 136.9, 130.2, 129.6, 127.8, 127.6, 127.3, 127.2, 91.0, 49.3, 47.8, 44.7, 36.3, 27.5, 27.0, 19.4, 18.8, 13.5; HRMS (ESI): *m/z* [M+H]<sup>+</sup> calcd for C<sub>20</sub>H<sub>24</sub>NOS<sub>2</sub>: 358.1294; found: 358.1298.

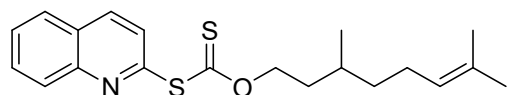

**O-(3,7-dimethyloct-6-en-1-yl) S-quinolin-2-yl carbonodithioate (3aw):** Yellow oil (104.2 mg, 58%). <sup>1</sup>H NMR (400 MHz, CDCl<sub>3</sub>) δ 8.18 (d, *J* = 8.5 Hz, 1H), 8.12 (d, *J* = 8.5 Hz, 1H), 7.84 (d, *J* = 8.1 Hz, 1H), 7.75 (t, *J* = 7.6 Hz, 1H), 7.68 (d, *J* = 8.4 Hz, 1H), 7.60 (t, *J* = 7.5 Hz, 1H), 4.99 (t, *J* = 6.6 Hz, 1H), 4.64 – 4.54 (m, 2H), 1.88 – 1.76 (m, 2H), 1.73 – 1.67 (m, 1H), 1.65 (s, 3H), 1.55 (s, 3H), 1.50 – 1.32 (m, 2H), 1.26 – 1.16 (m, 1H), 1.13 – 1.02 (m, 1H), 0.79 (d, *J* = 6.5 Hz, 3H); <sup>13</sup>C NMR (100 MHz,

CDCl<sub>3</sub>)  $\delta$  210.4, 152.8, 148.3, 136.9, 131.3, 130.2, 129.5, 127.8, 127.5, 127.3, 127.1, 124.3, 72.9, 36.8, 34.7, 29.3, 25.6, 25.3, 19.1, 17.6; HRMS (ESI):  $m/z$  [M+H]<sup>+</sup> calcd for C<sub>20</sub>H<sub>26</sub>NOS<sub>2</sub>: 360.1450; found: 360.1454.

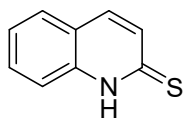

**quinoline-2(1H)-thione (4a):** Yellow solid (70.0 mg, 87%). mp: 172–174 °C. <sup>1</sup>H NMR (400 MHz, CDCl<sub>3</sub>)  $\delta$  13.29 (s, 1H), 7.66 (d,  $J$  = 8.6 Hz, 2H), 7.61 (d,  $J$  = 7.9 Hz, 1H), 7.56 (t,  $J$  = 7.6 Hz, 1H), 7.46 (d,  $J$  = 8.9 Hz, 1H), 7.32 (t,  $J$  = 7.4 Hz, 1H); <sup>13</sup>C NMR (100 MHz, CDCl<sub>3</sub>)  $\delta$  180.5, 139.0, 135.7, 131.4, 127.7, 124.9, 122.9, 116.1. The compound spectra data is in accord with the previous literature.<sup>4</sup>

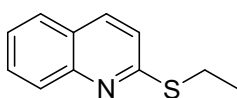

**2-(ethylthio)quinoline (5a):** Yellow oil (87.9 mg, 93%). <sup>1</sup>H NMR (400 MHz, CDCl<sub>3</sub>)  $\delta$  7.94 (d,  $J$  = 8.4 Hz, 1H), 7.87 (d,  $J$  = 8.6 Hz, 1H), 7.71 (d,  $J$  = 8.0 Hz, 1H), 7.64 (t,  $J$  = 7.6 Hz, 1H), 7.42 (t,  $J$  = 7.4 Hz, 1H), 7.20 (d,  $J$  = 8.6 Hz, 1H), 3.36 (q,  $J$  = 7.3 Hz, 2H), 1.45 (t,  $J$  = 7.3 Hz, 3H); <sup>13</sup>C NMR (100 MHz, CDCl<sub>3</sub>)  $\delta$  159.5, 148.3, 135.2, 129.5, 128.0, 127.6, 125.9, 125.1, 121.0, 24.2, 14.6. The compound spectra data is in accord with the previous literature.<sup>5</sup>

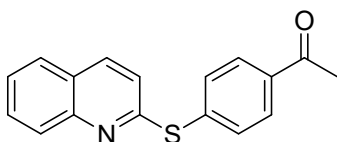

**1-(4-(quinolin-2-ylthio)phenyl)ethanone (6a):** Yellow solid (94.9 mg, 68%). mp: 112–113 °C. <sup>1</sup>H NMR (400 MHz, CDCl<sub>3</sub>)  $\delta$  7.96 (t,  $J$  = 9.6 Hz, 4H), 8.00 – 7.93 (m, 4H), 7.49 (t,  $J$  = 7.4 Hz, 1H), 7.15 (d,  $J$  = 8.7 Hz, 1H), 2.63 (s, 3H); <sup>13</sup>C NMR (100 MHz, CDCl<sub>3</sub>)  $\delta$  197.3, 158.9, 148.1, 138.1, 136.8, 136.7, 133.3, 130.2, 129.1, 128.5, 127.6, 126.3, 126.2, 120.8, 26.6; HRMS (ESI):  $m/z$  [M+H]<sup>+</sup> calcd for C<sub>17</sub>H<sub>14</sub>NOS: 280.0791; found: 280.0793.

#### 4. References

1. W.-H. Bao and X. Wu, *J. Org. Chem.*, 2023, **88**, 3975-3980.
2. D. I. Bugaenko, A. A. Volkov, V. V. Andreychev and A. V. Karchava, *Org. Lett.*, 2023, **25**, 272-276.
3. M. Zhang, B. Wang, Y. Cao, Y. Liu, Z. Wang and Q. Wang, *Org. Lett.*, 2022, **24**, 8895-8900.
4. D. I. Bugaenko, O. A. Tikhanova and A. V. Karchava, *J. Org. Chem.*, 2023, **88**, 1018-1023.
5. R. Beugelmans, M. Bois-Choussy and B. Boudet, *Tetrahedron*, 1983, **39**, 4153-4161.



## 5. $^1\text{H}$ and $^{13}\text{C}$ NMR spectra of products

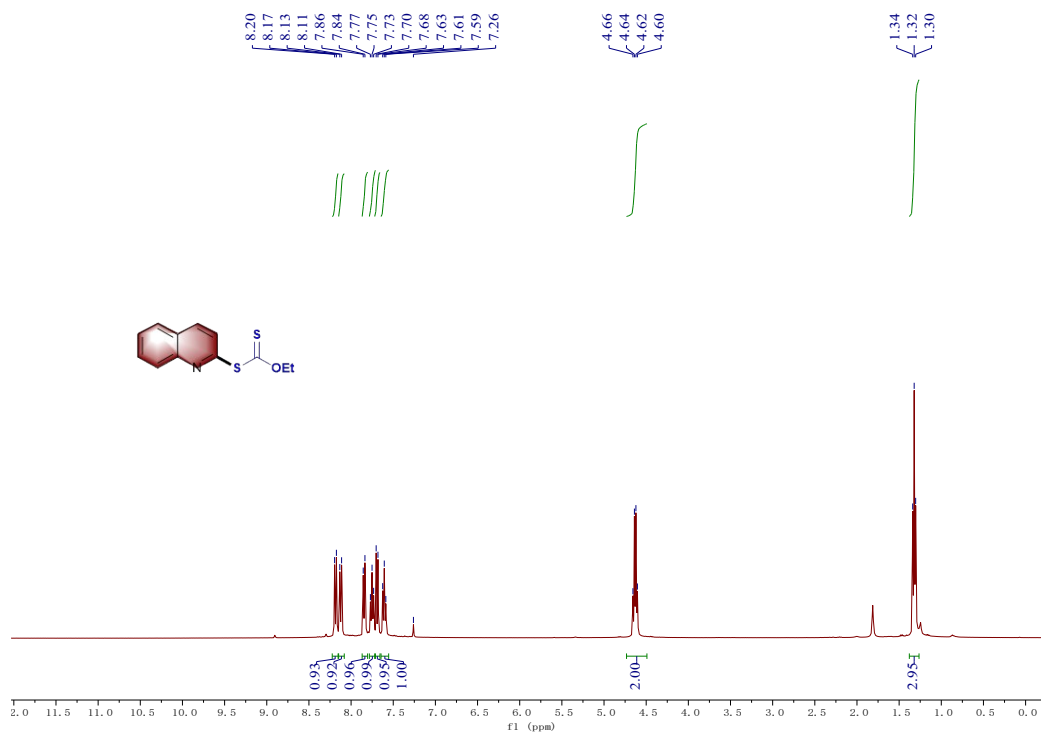

$^1\text{H}$  spectra of 3aa

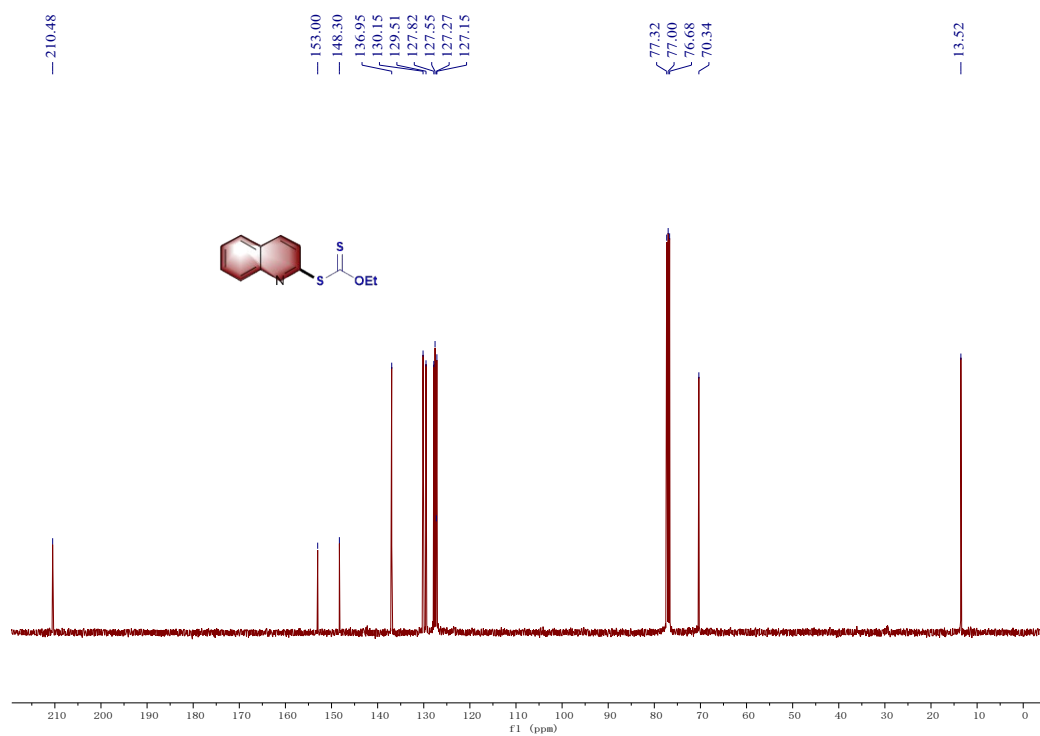

$^{13}\text{C}$  spectra of 3aa

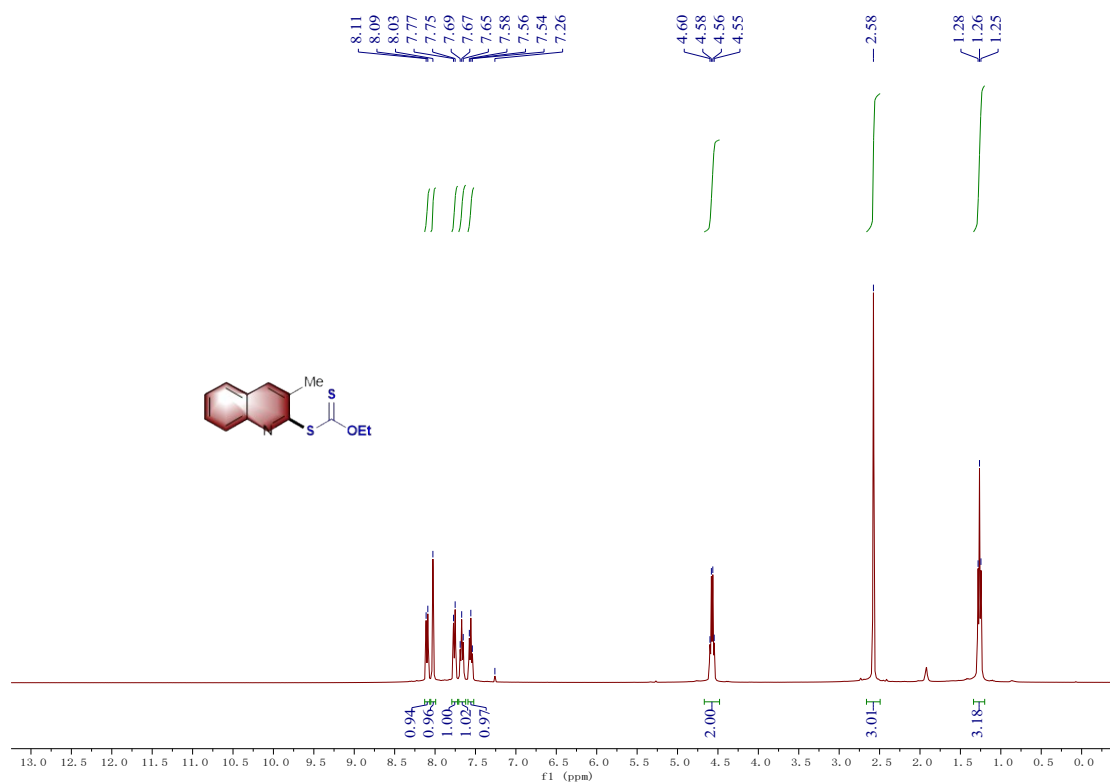

$^1\text{H}$  spectra of 3ba

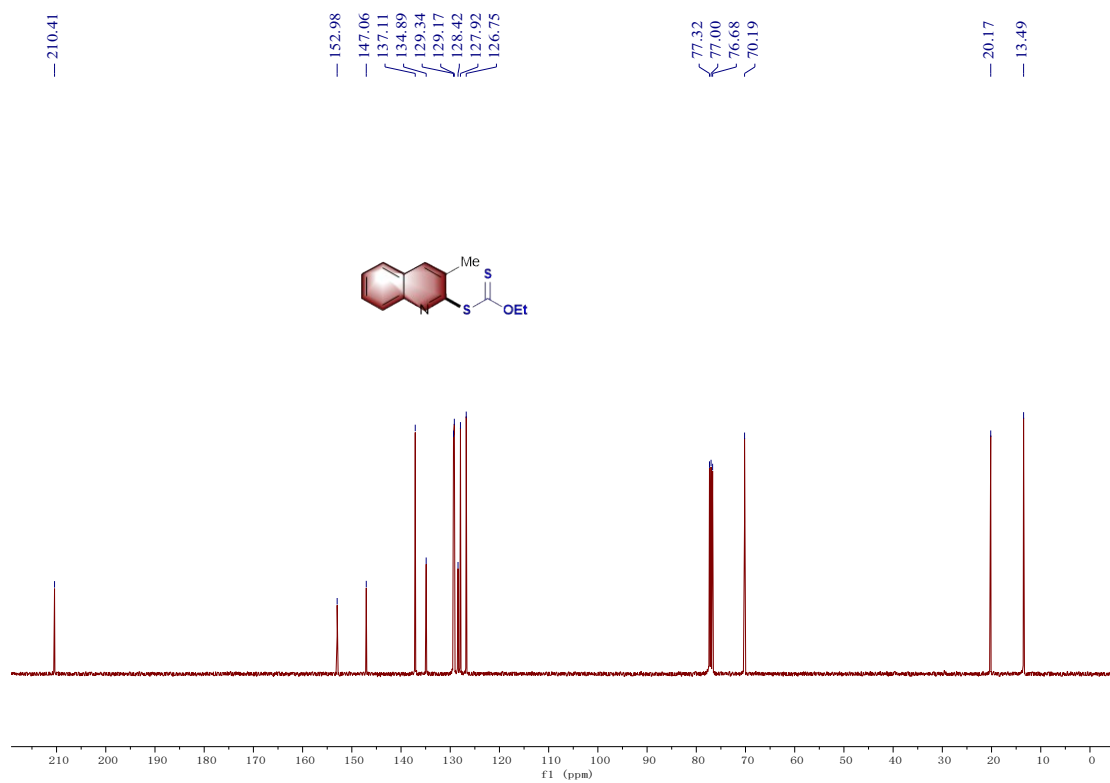

$^{13}\text{C}$  spectra of 3ba

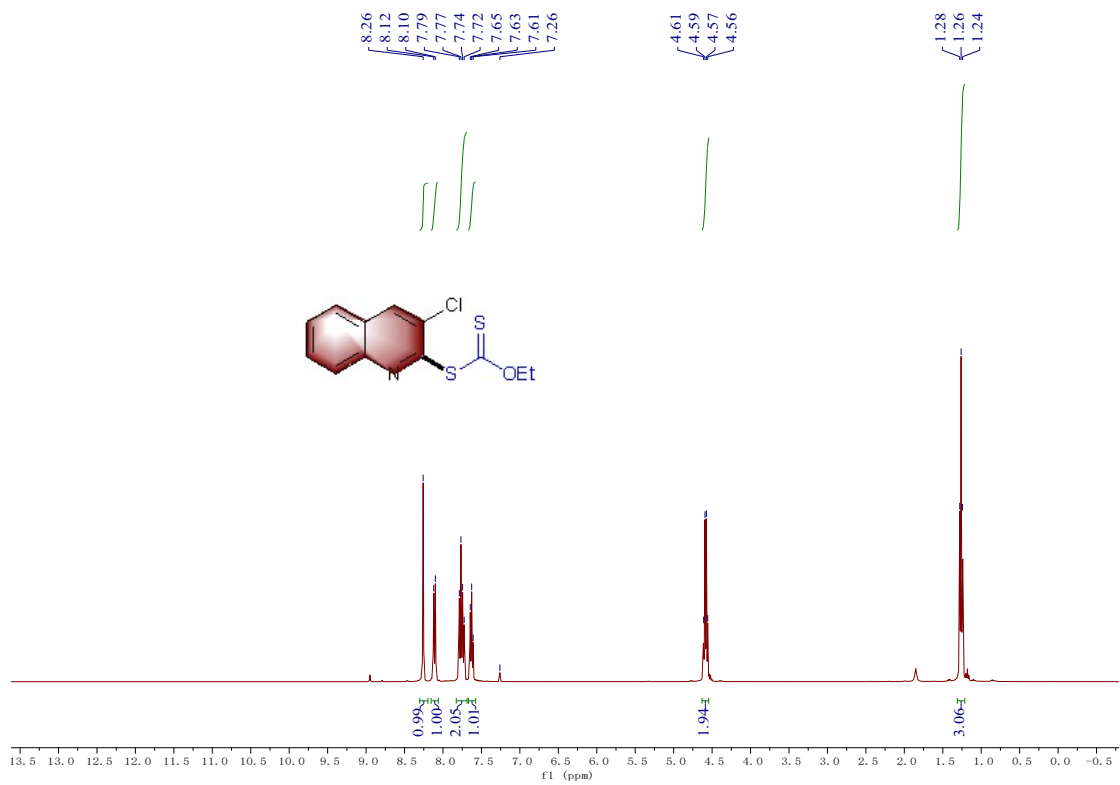

$^1\text{H}$  spectra of 3ca

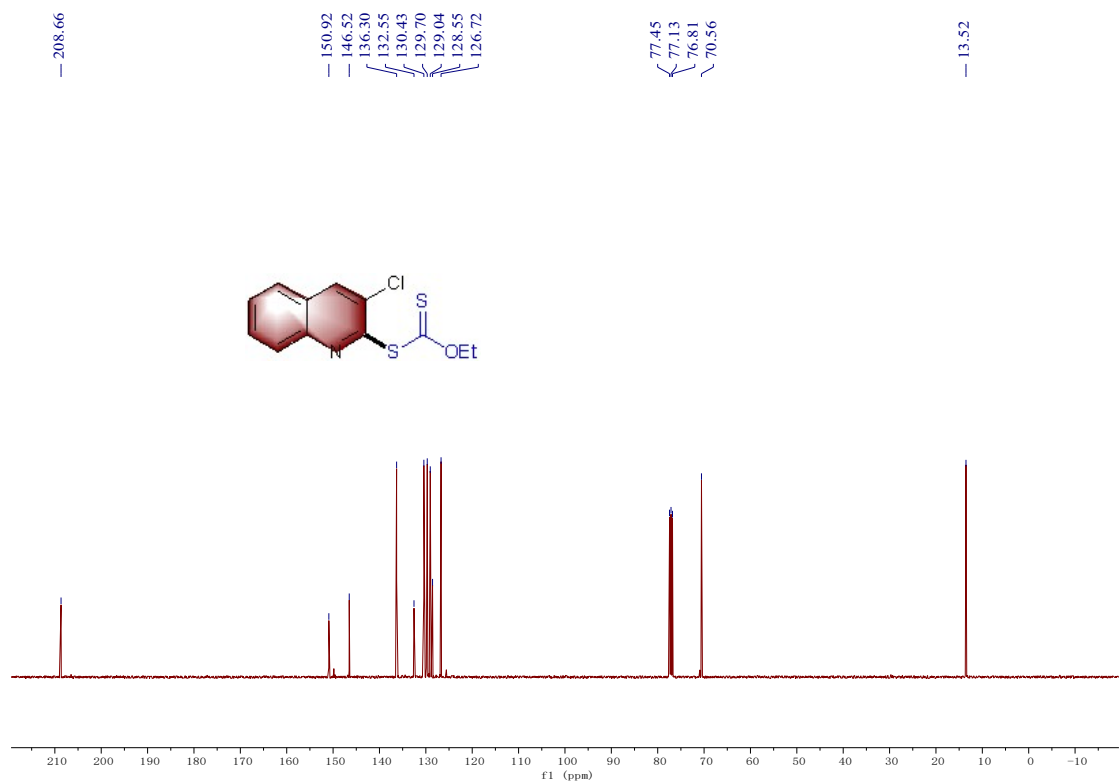

$^{13}\text{C}$  spectra of 3ca

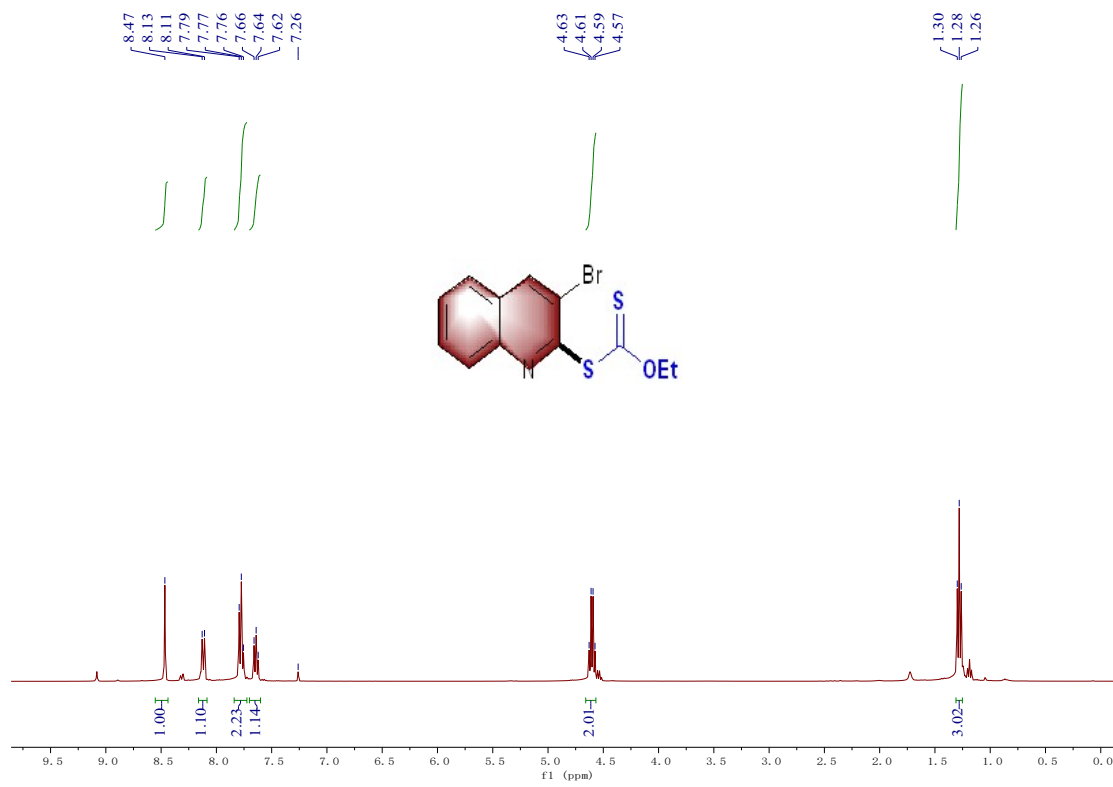

<sup>1</sup>H spectra of 3da

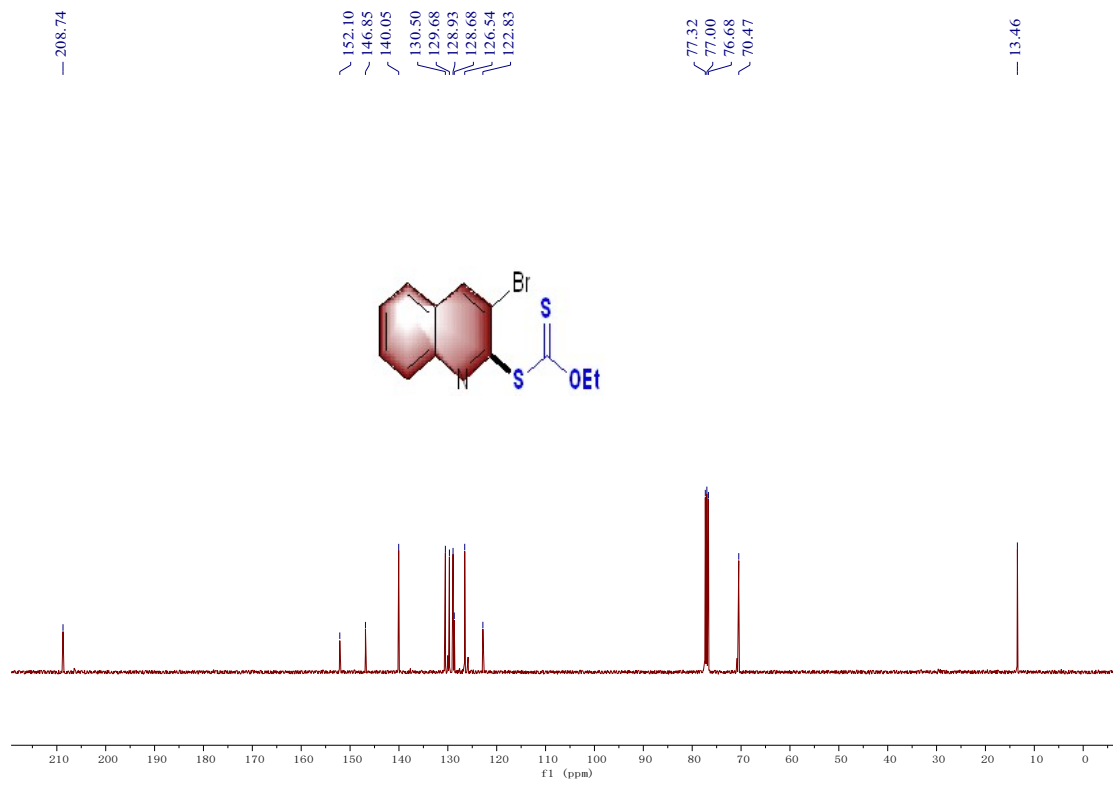

<sup>13</sup>C spectra of 3da

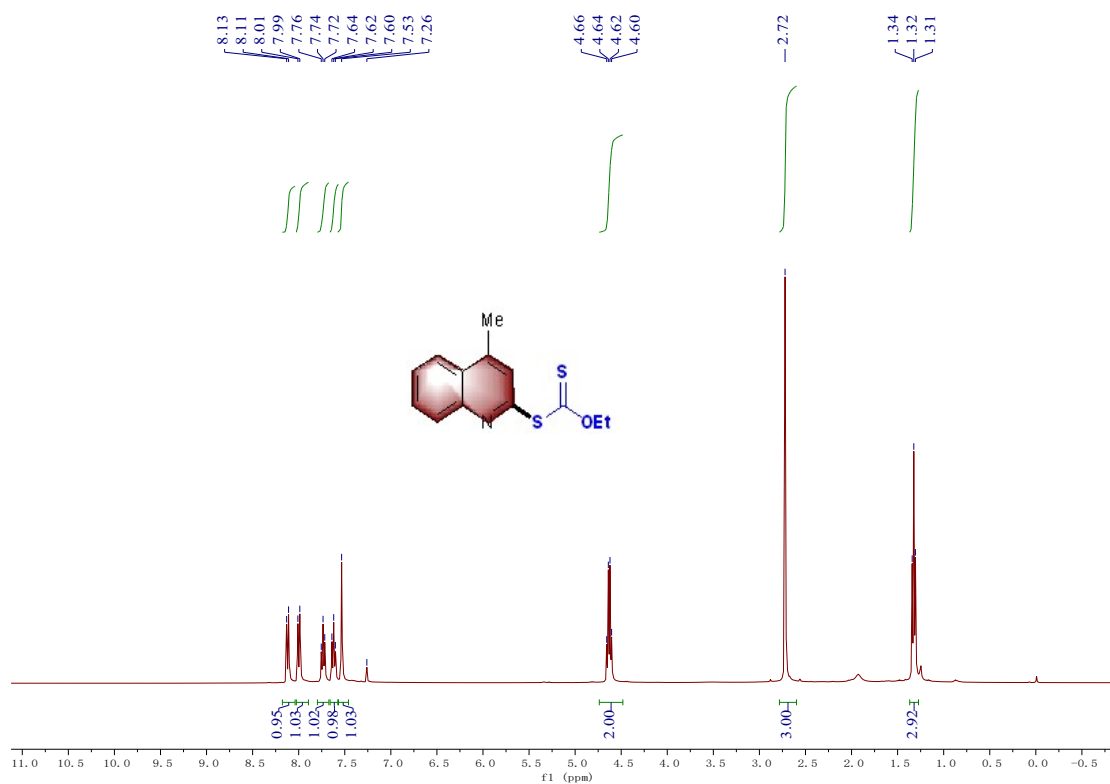

<sup>1</sup>H spectra of 3ea

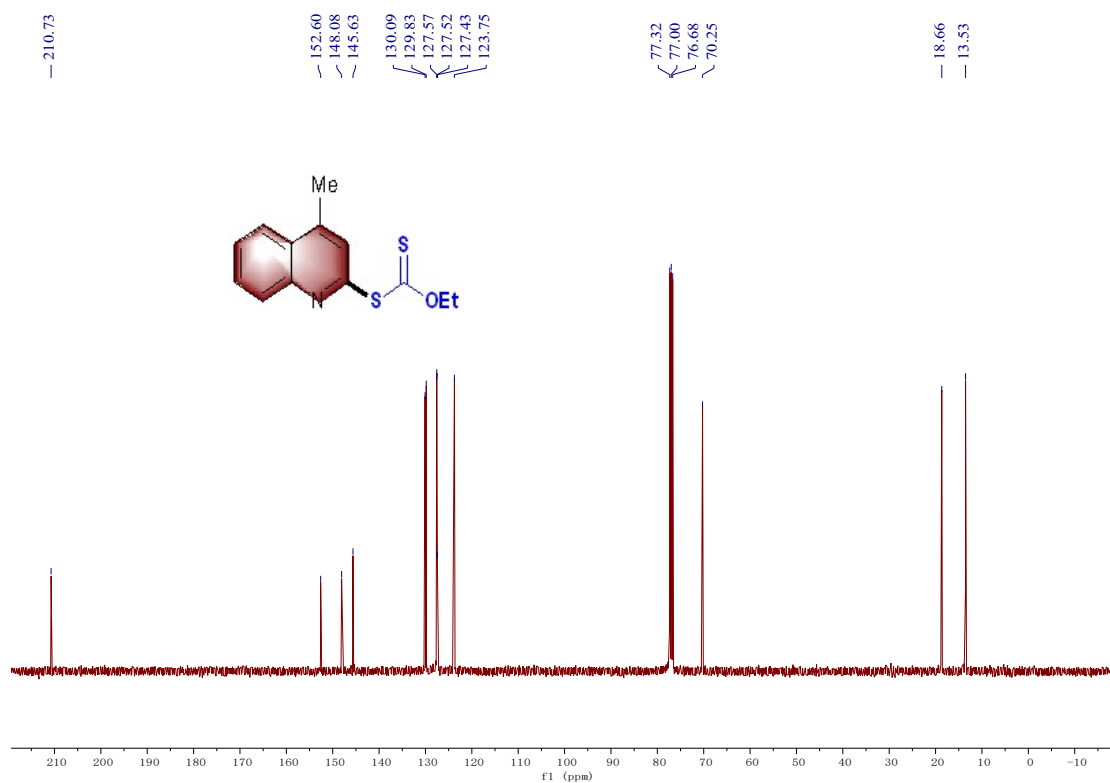

<sup>13</sup>C spectra of 3ea

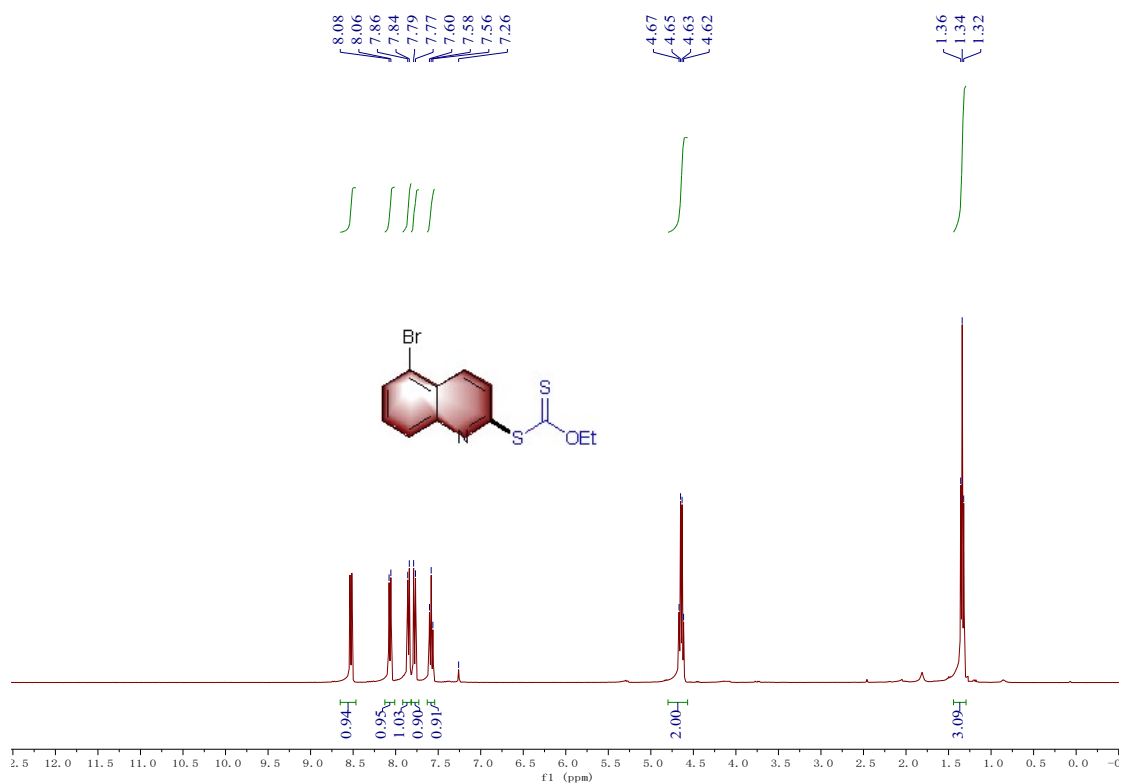

<sup>1</sup>H spectra of 3fa

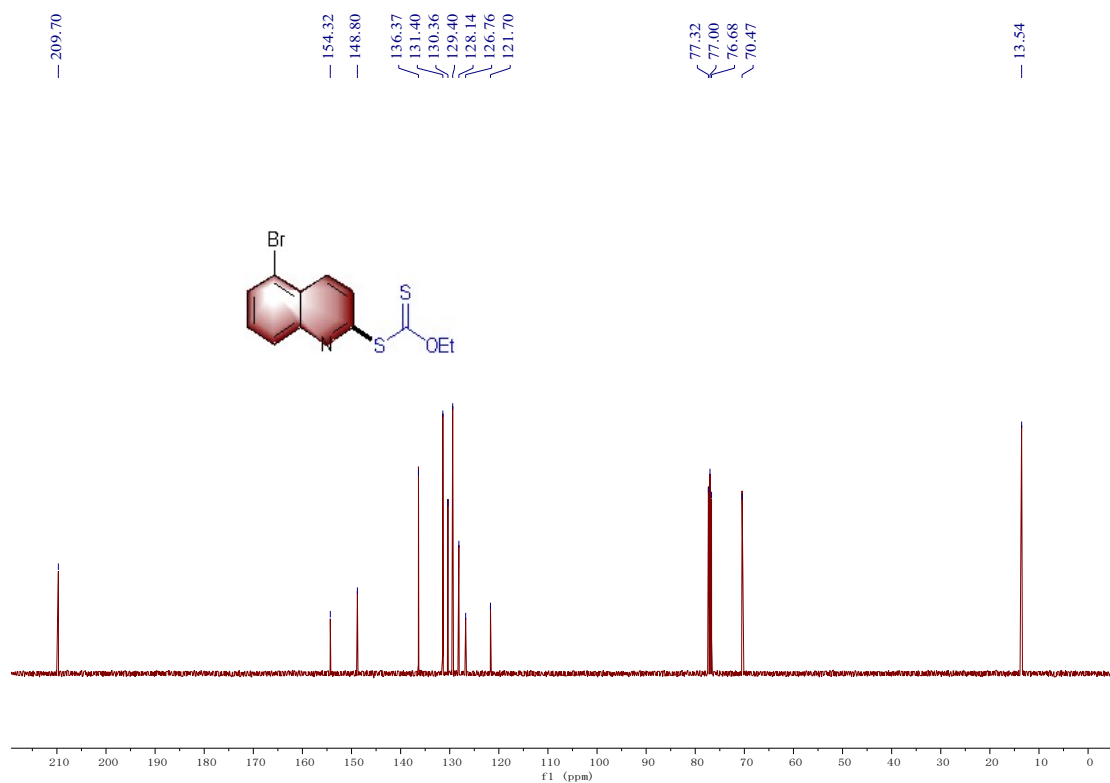

<sup>13</sup>C spectra of 3fa

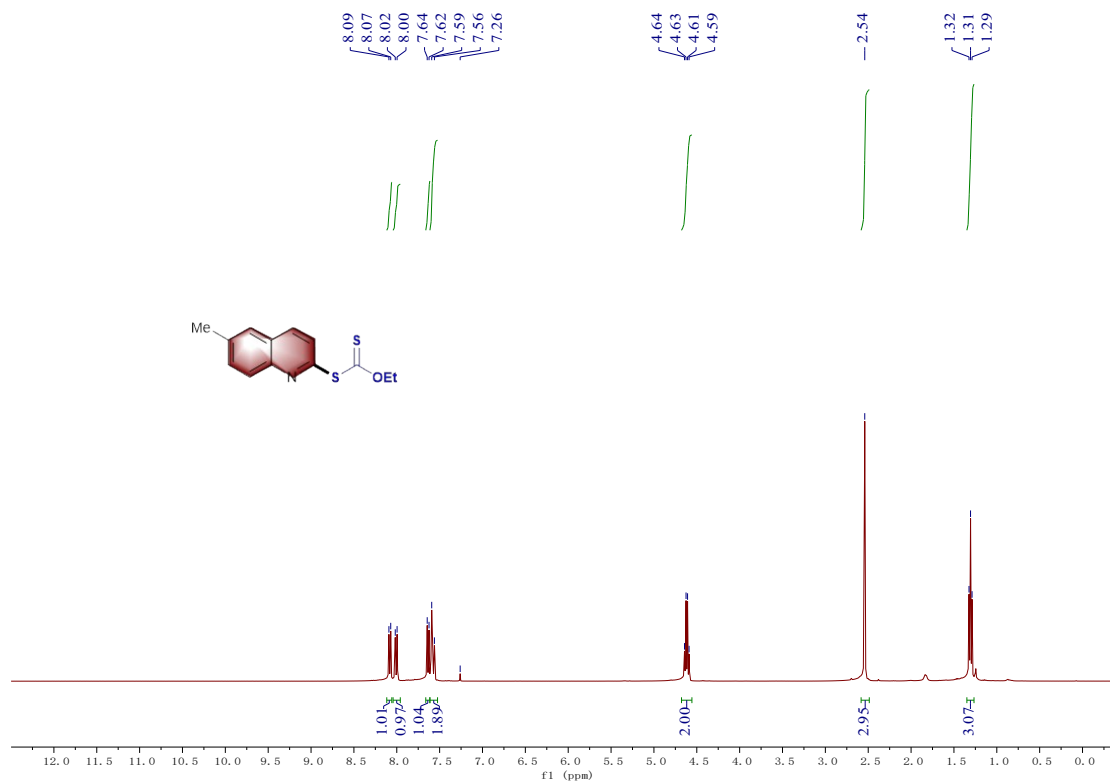

<sup>1</sup>H spectra of 3ga

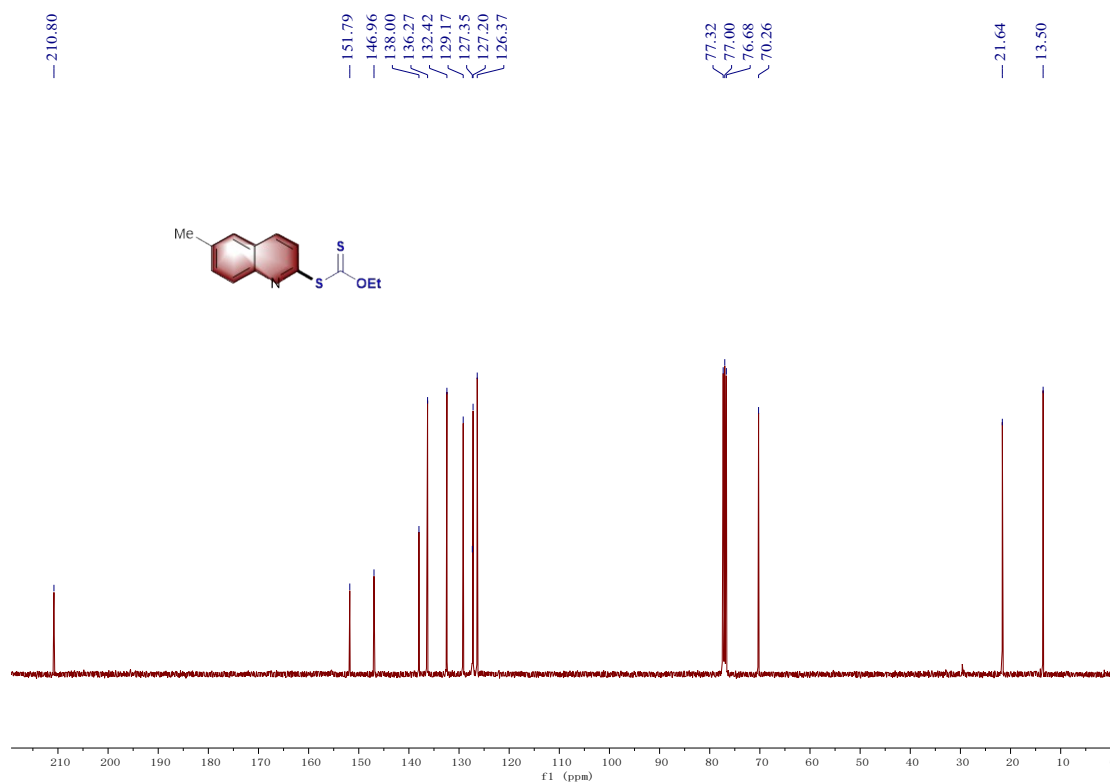

<sup>13</sup>C spectra of 3ga

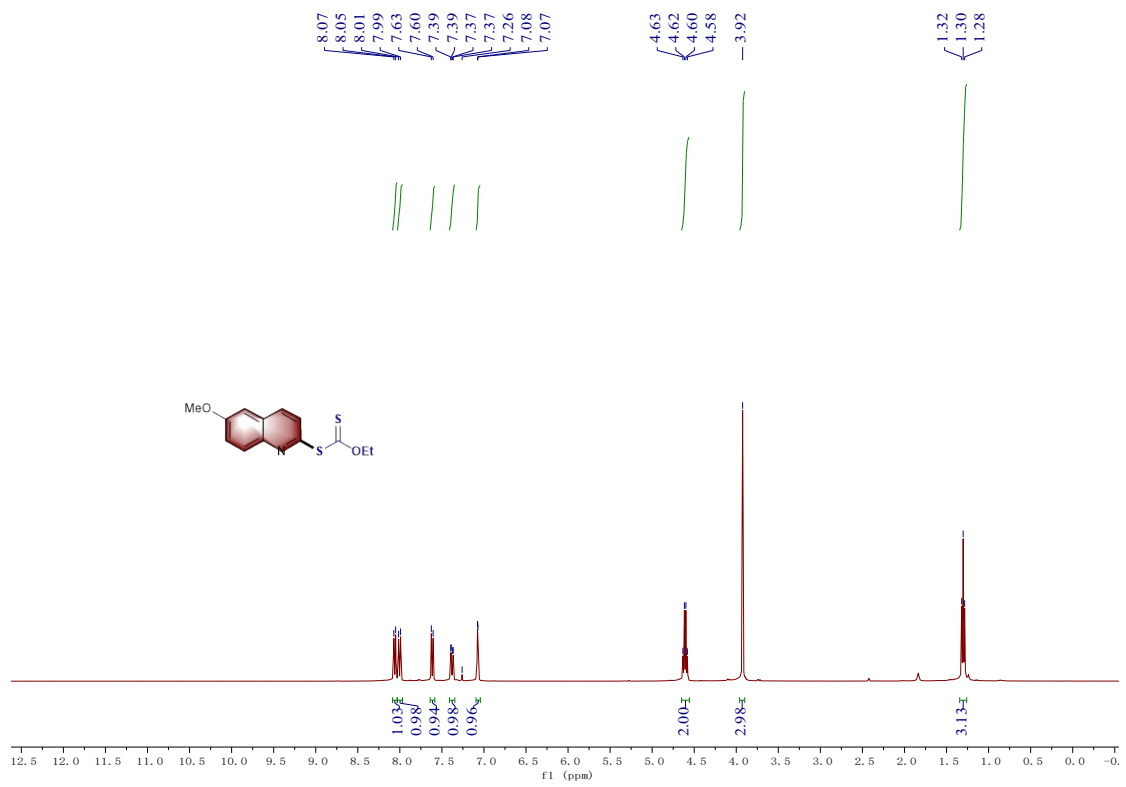

<sup>1</sup>H spectra of 3ha

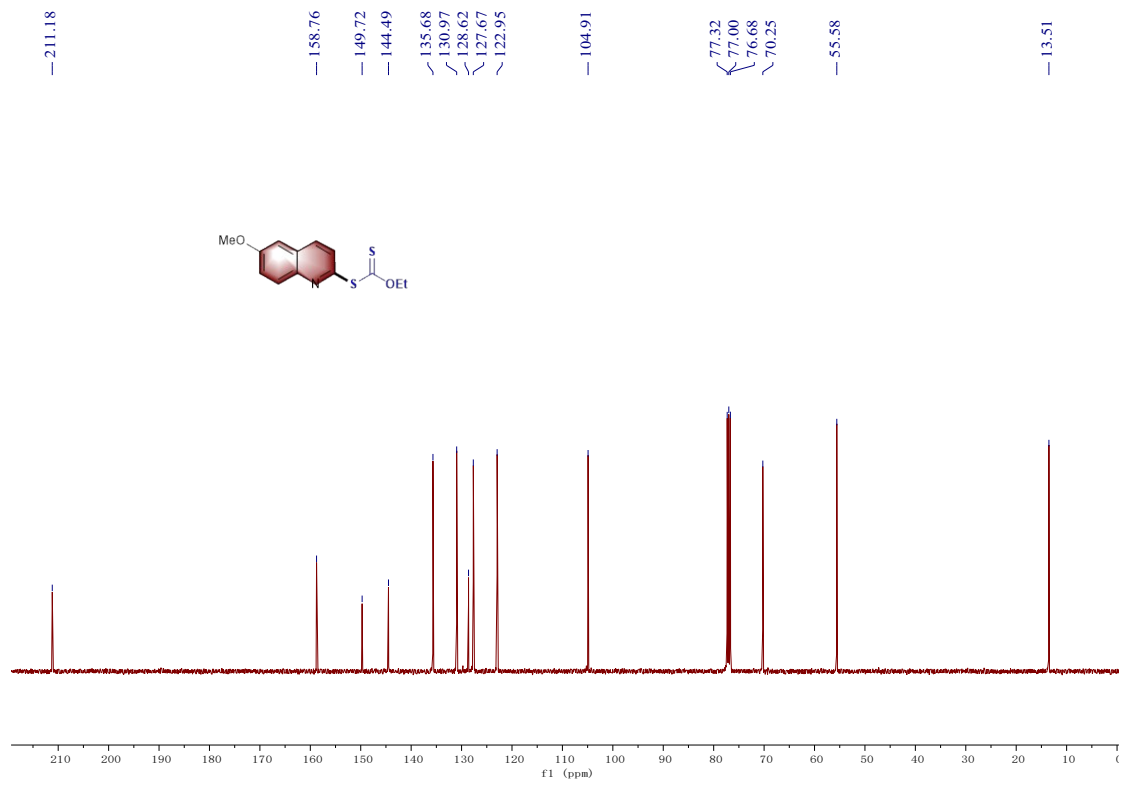

<sup>13</sup>C spectra of 3ha



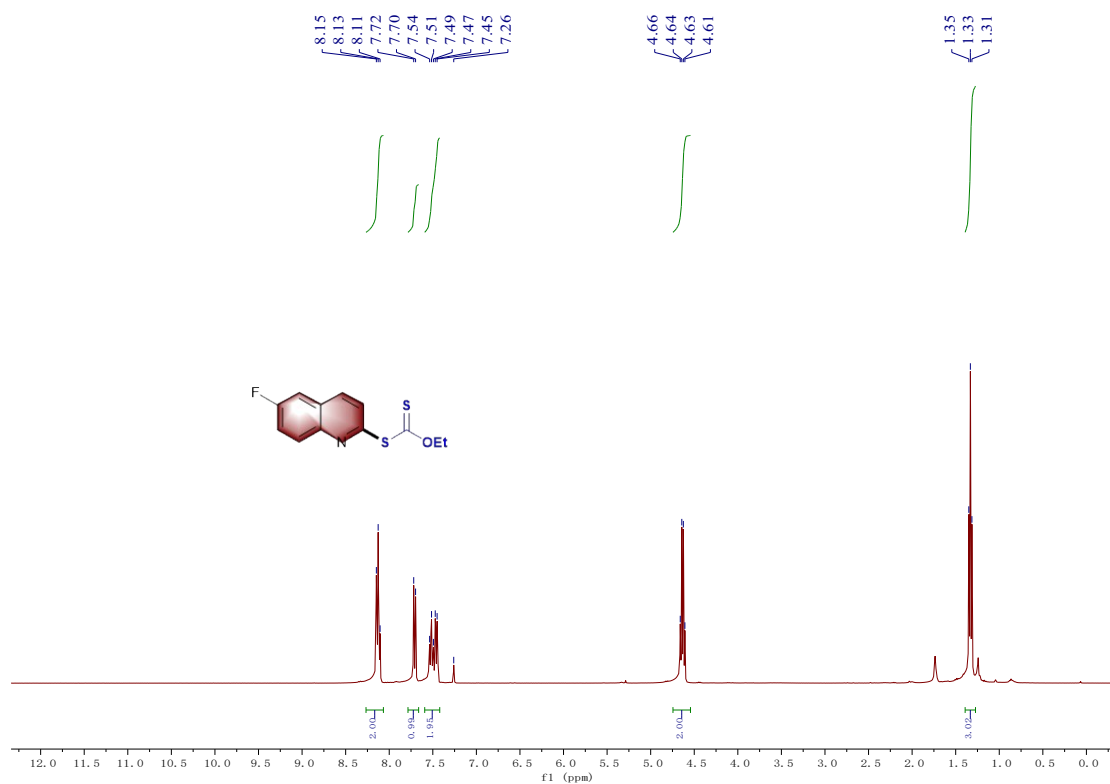

<sup>1</sup>H spectra of 3ia

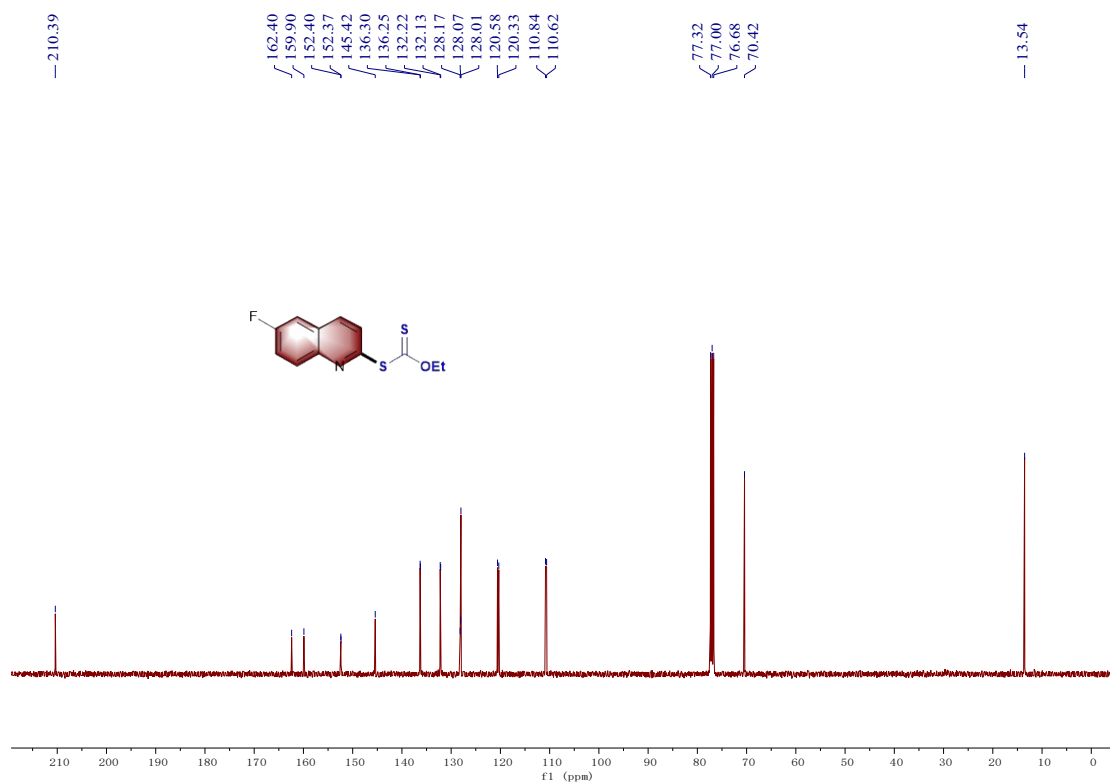

<sup>13</sup>C spectra of 3ia

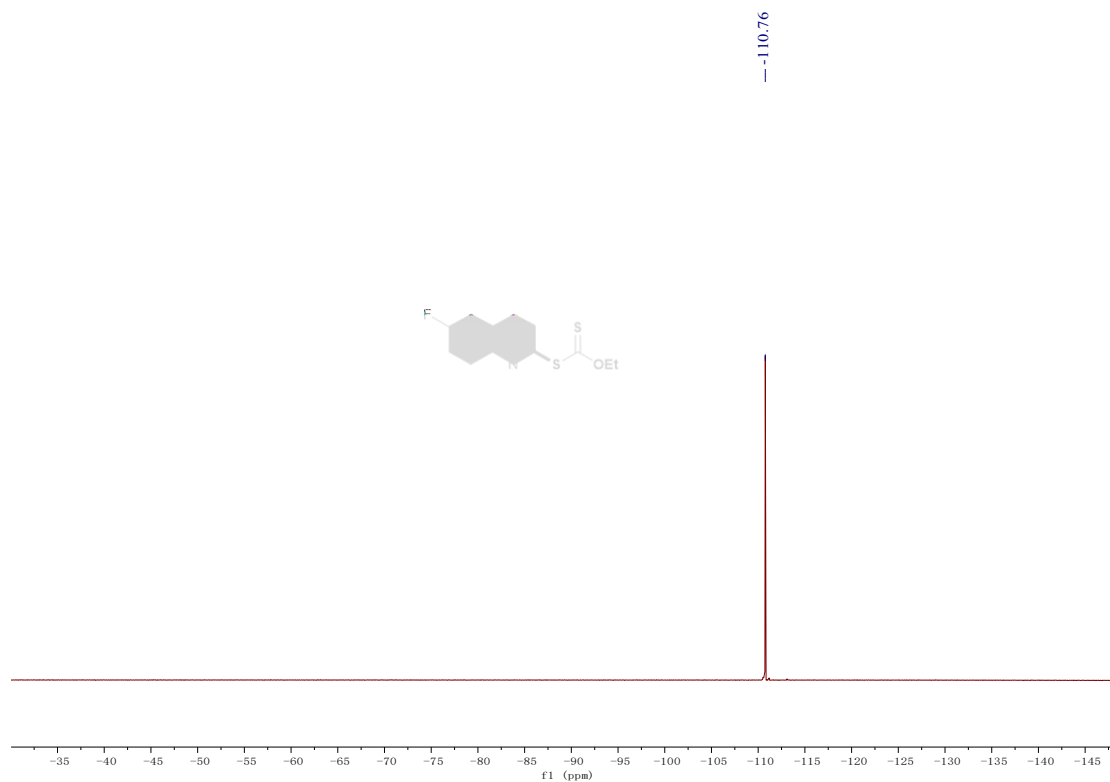

$^{19}\text{F}$  spectra of 3ia

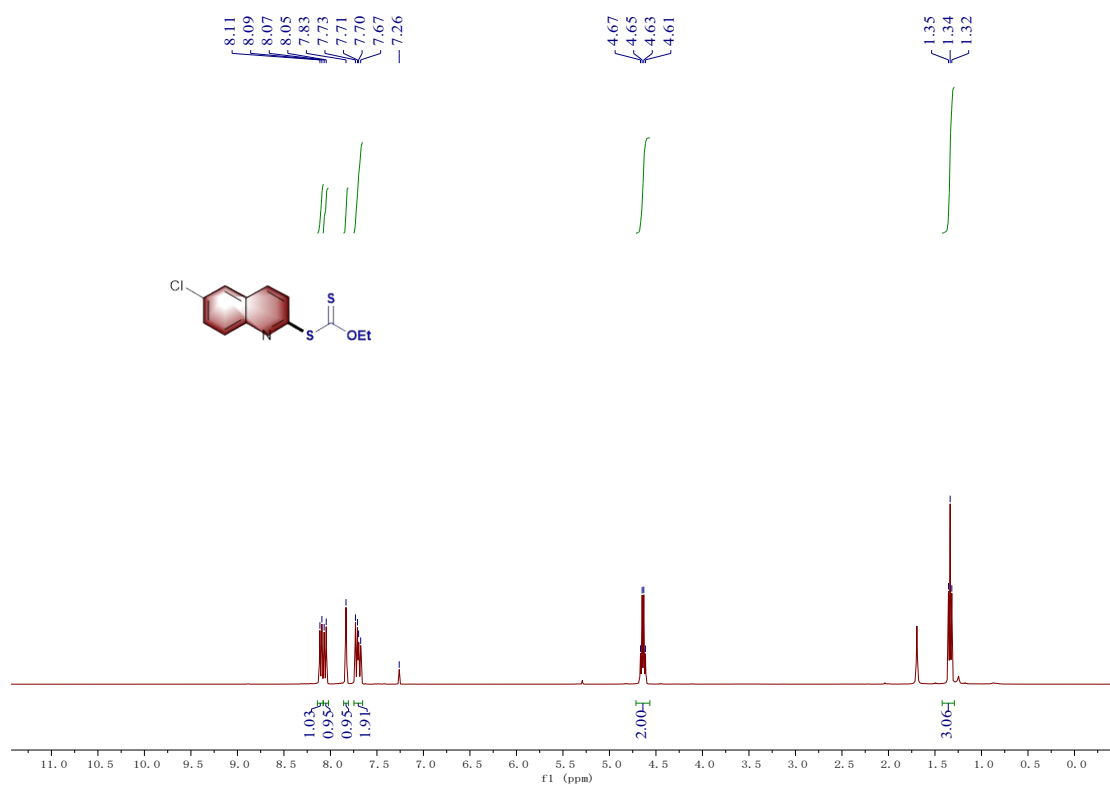

$^1\text{H}$  spectra of 3ja

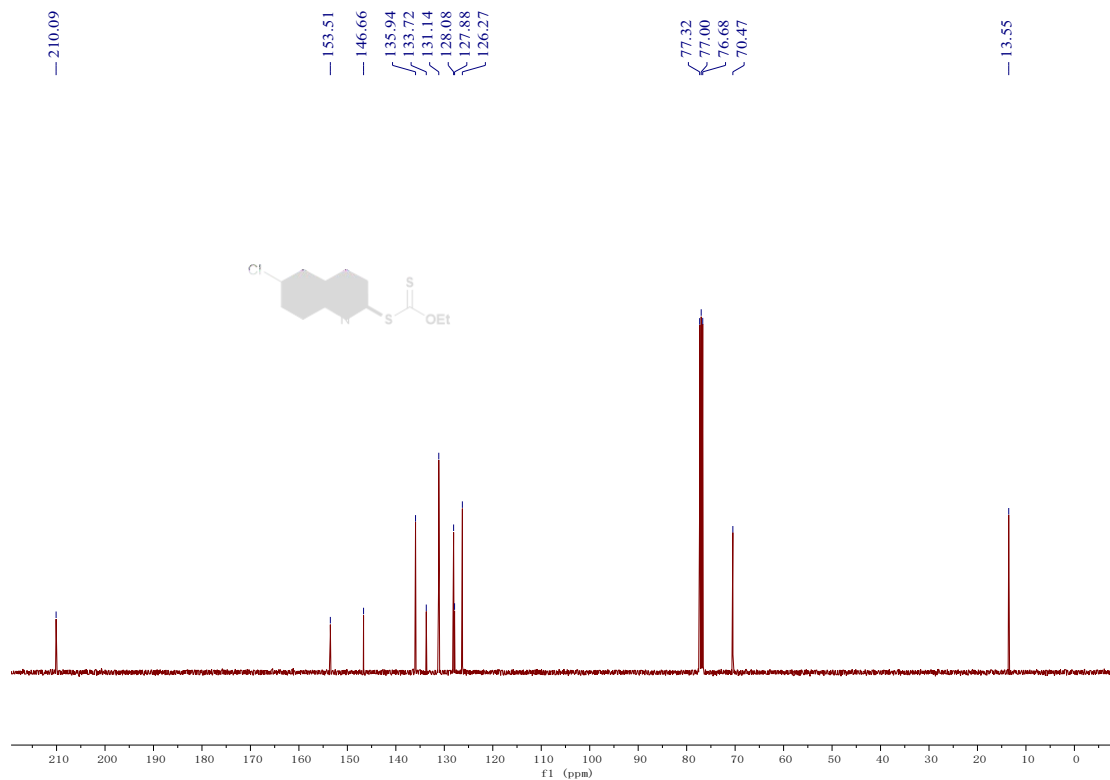

$^{13}\text{C}$  spectra of 3ja

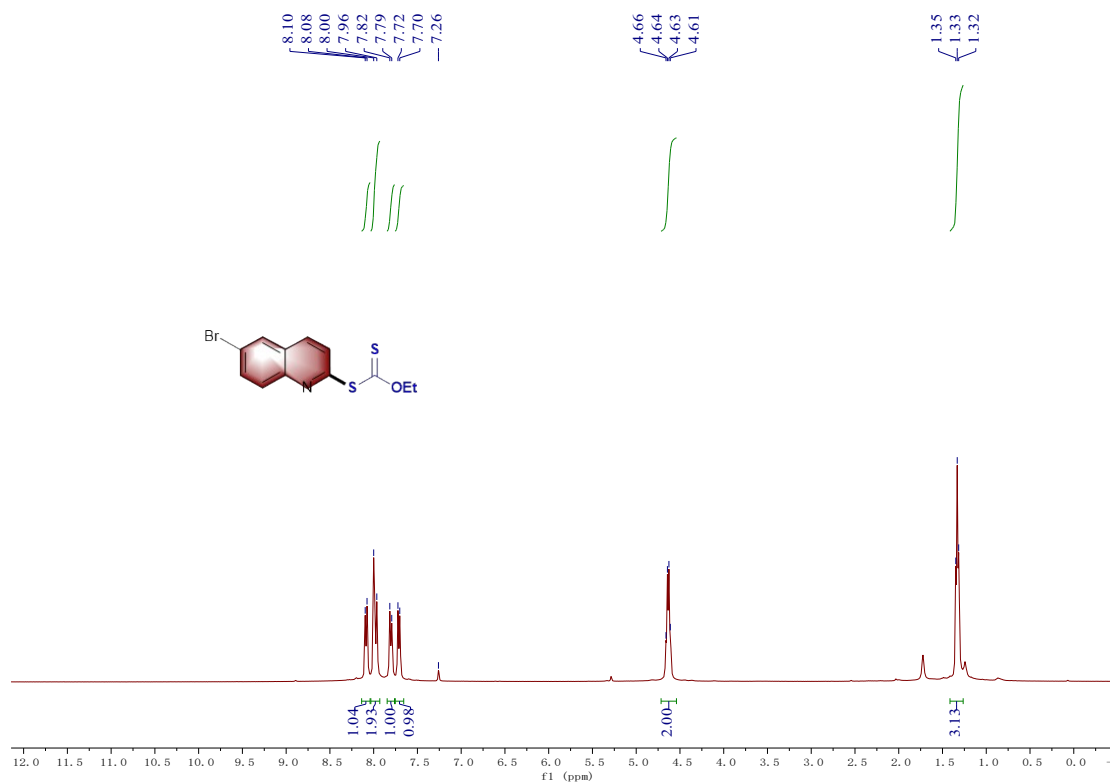

$^1\text{H}$  spectra of 3ka

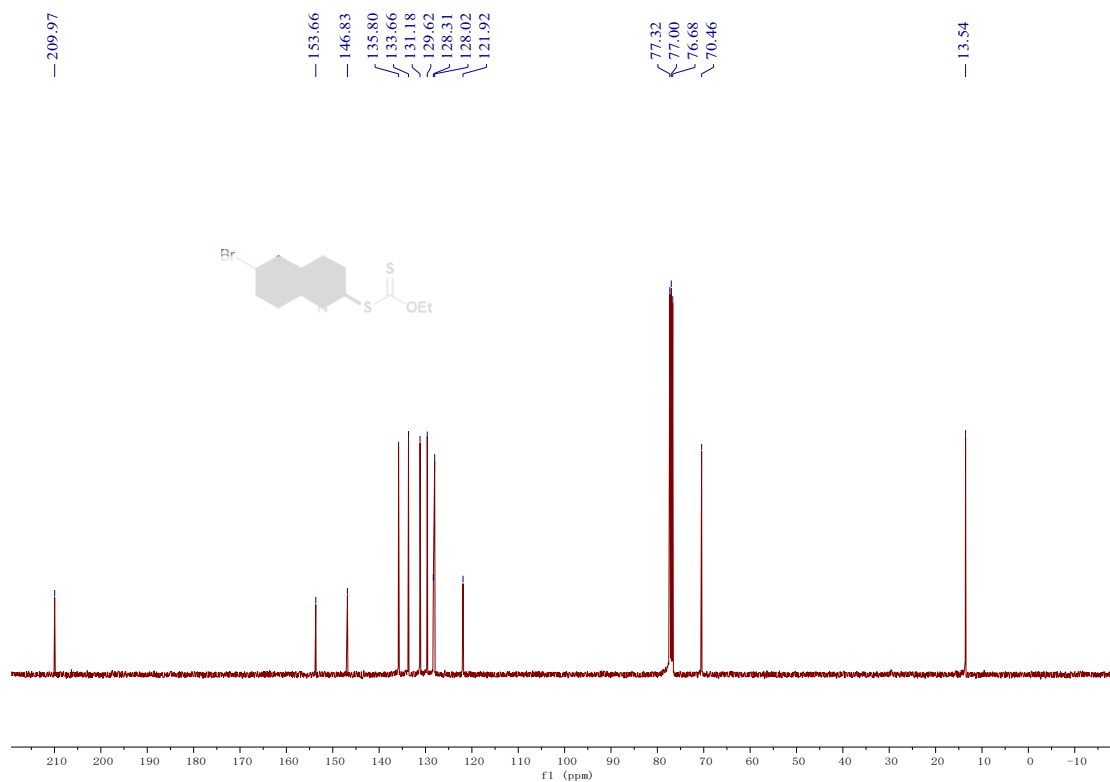

$^{13}\text{C}$  spectra of **3ka**

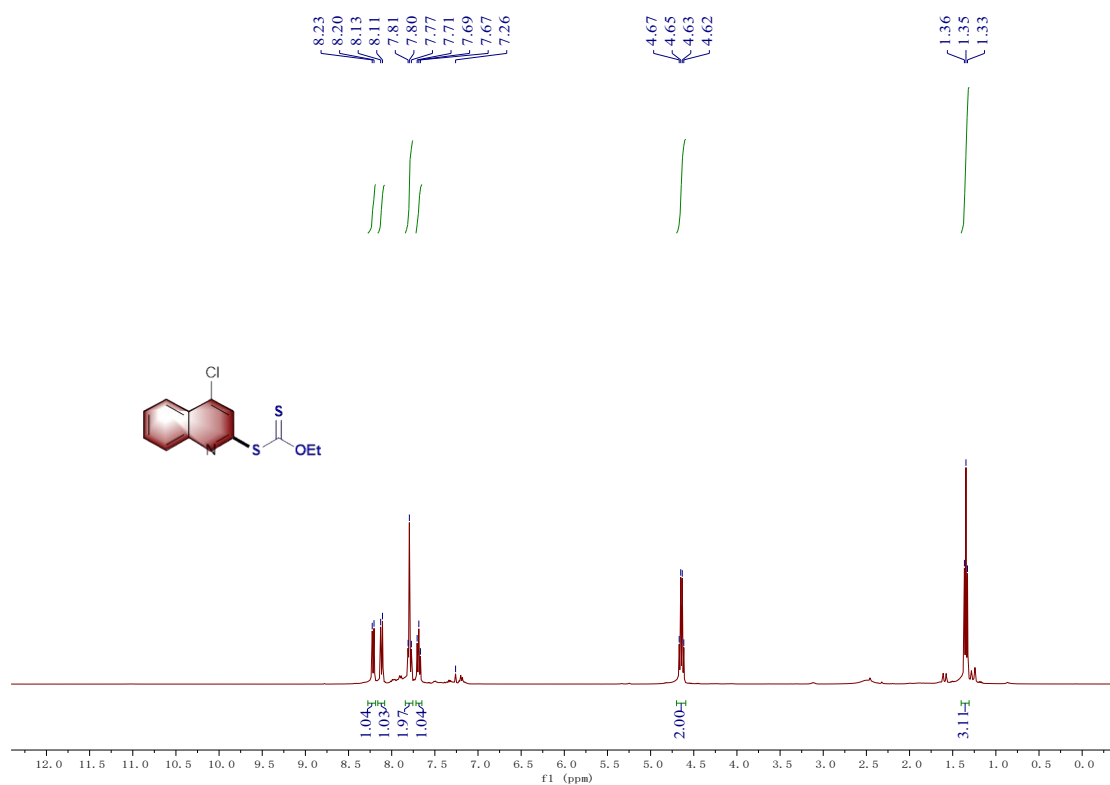

$^1\text{H}$  spectra of **3la**

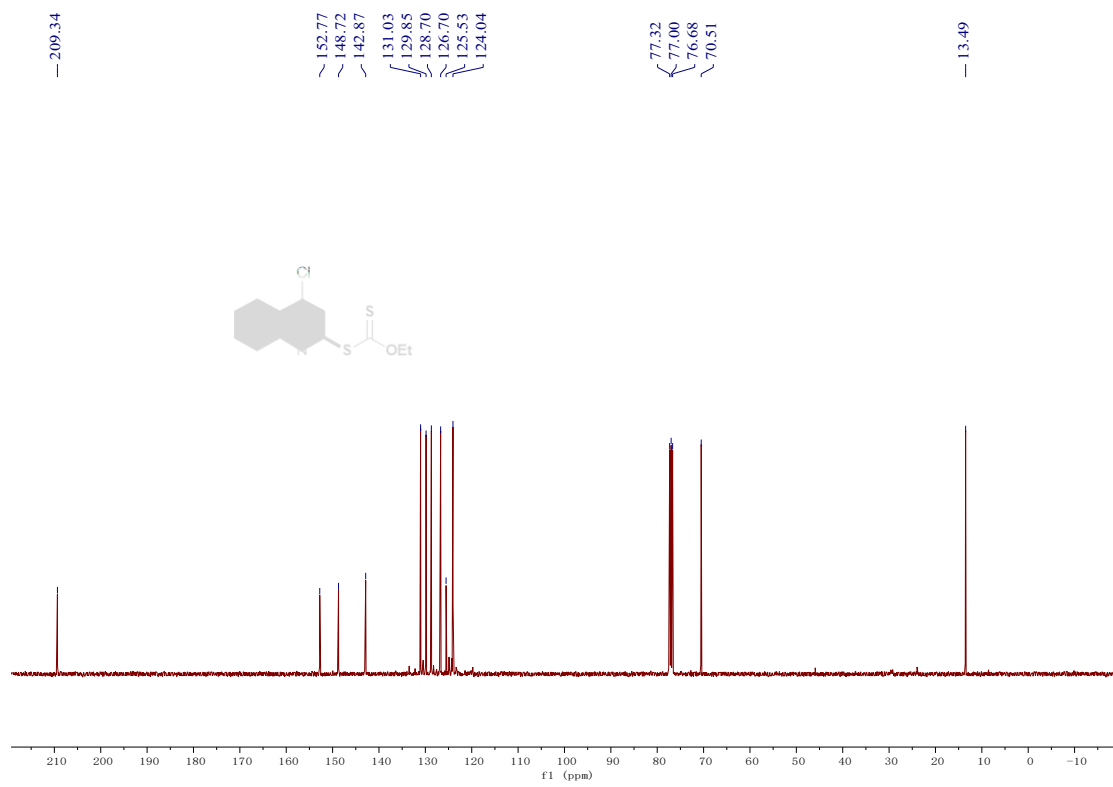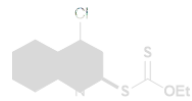

<sup>13</sup>C spectra of 3a

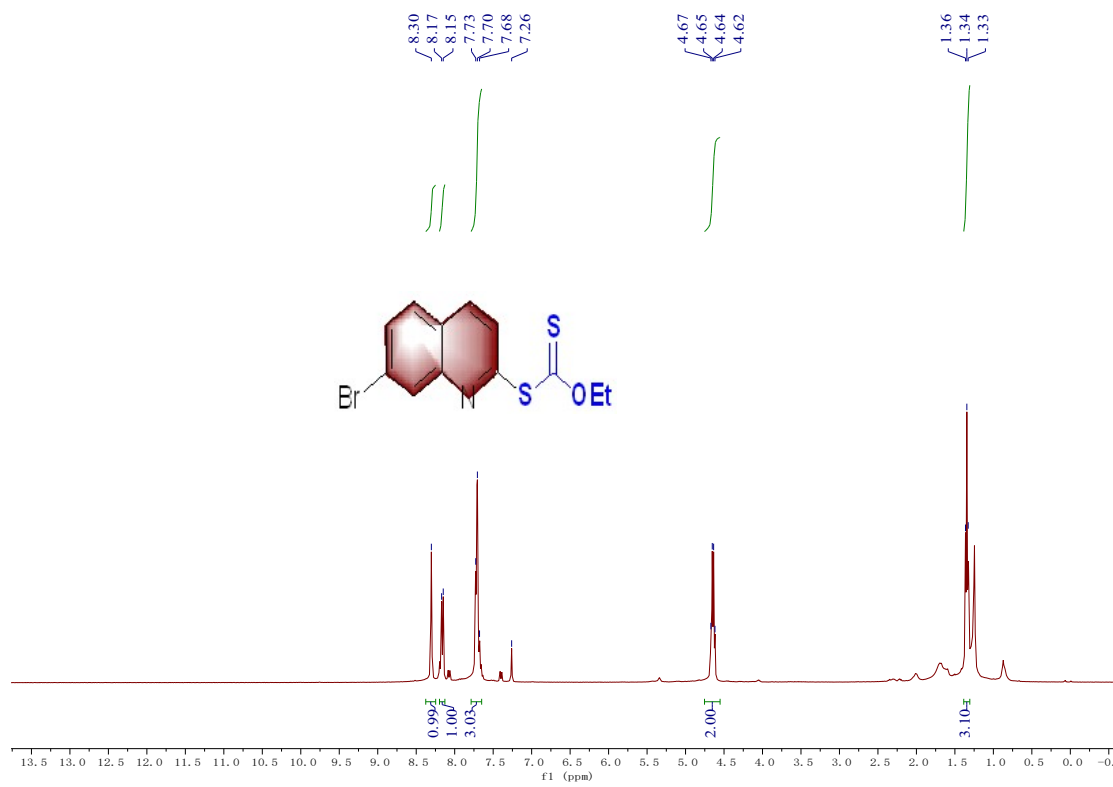

<sup>1</sup>H spectra of 3ma

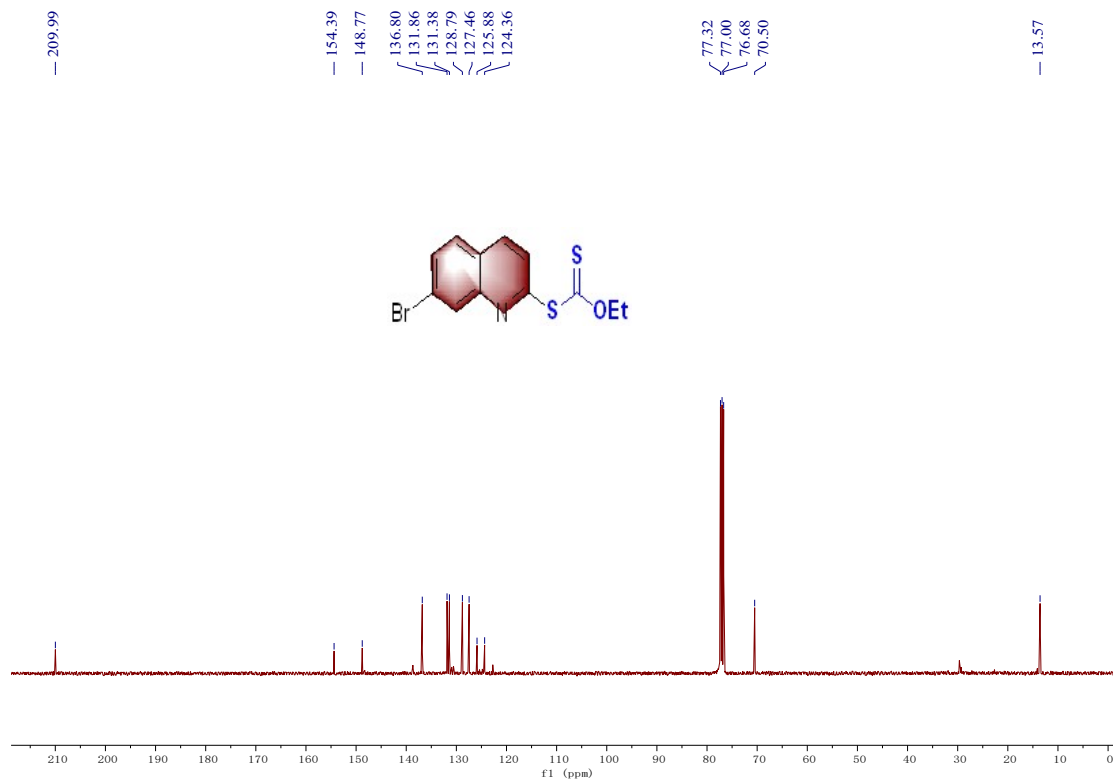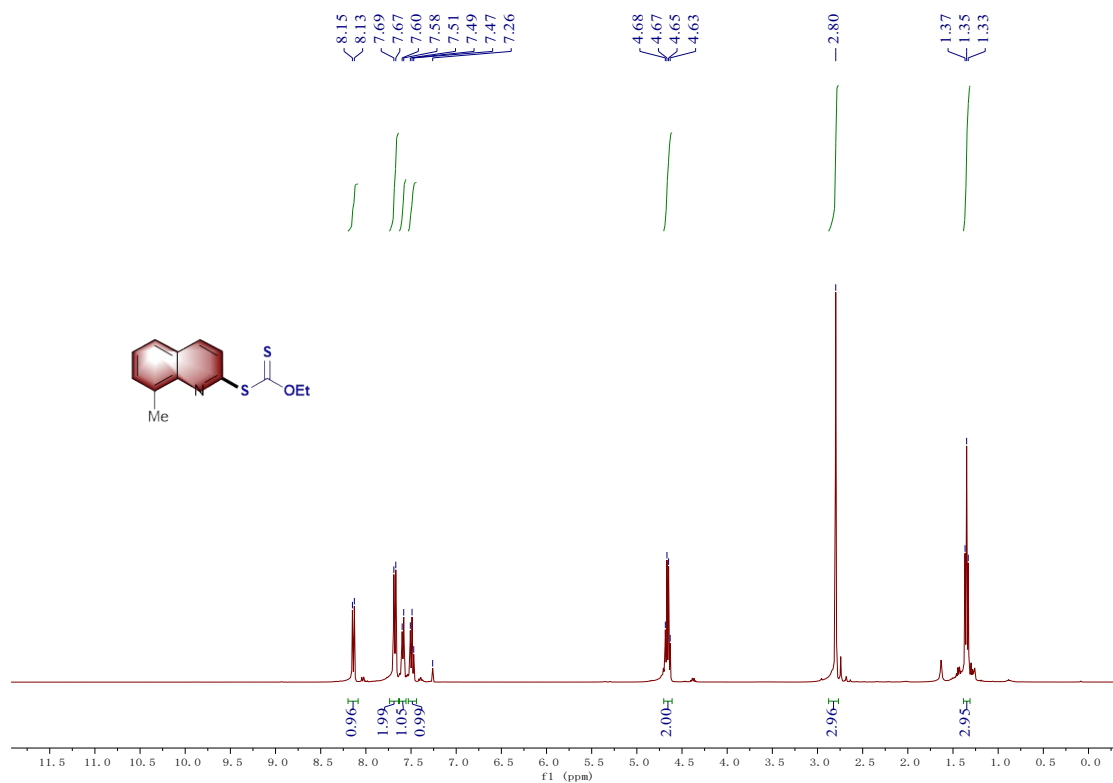

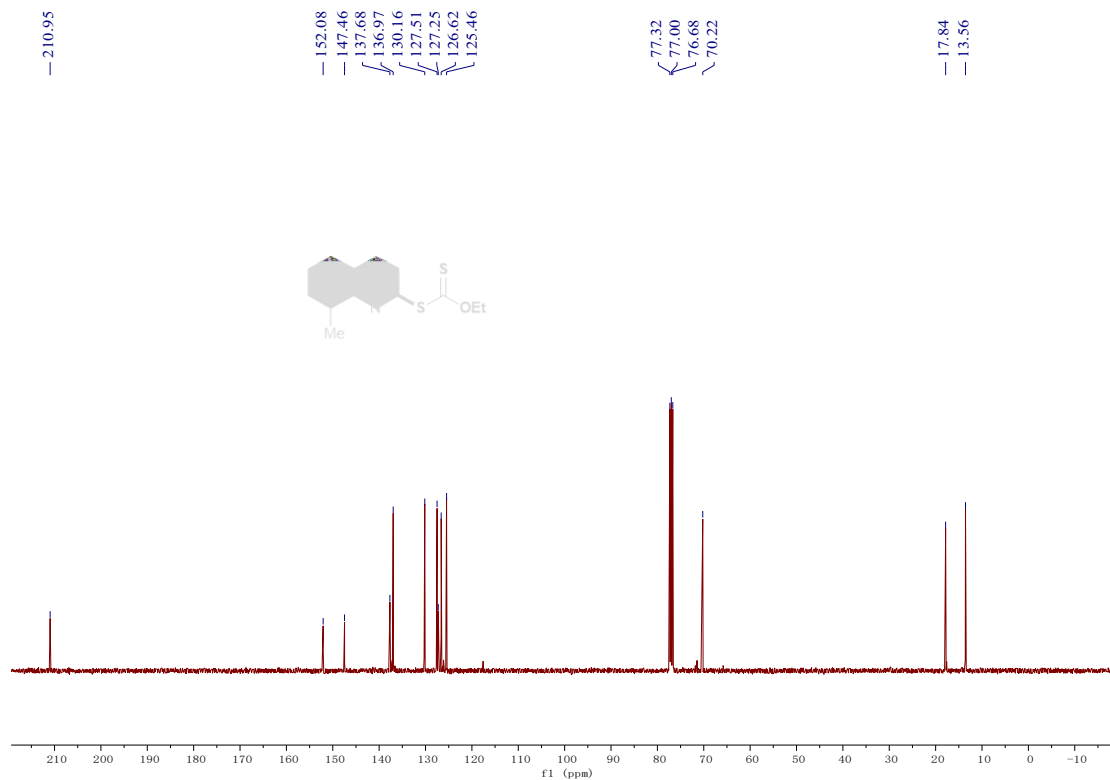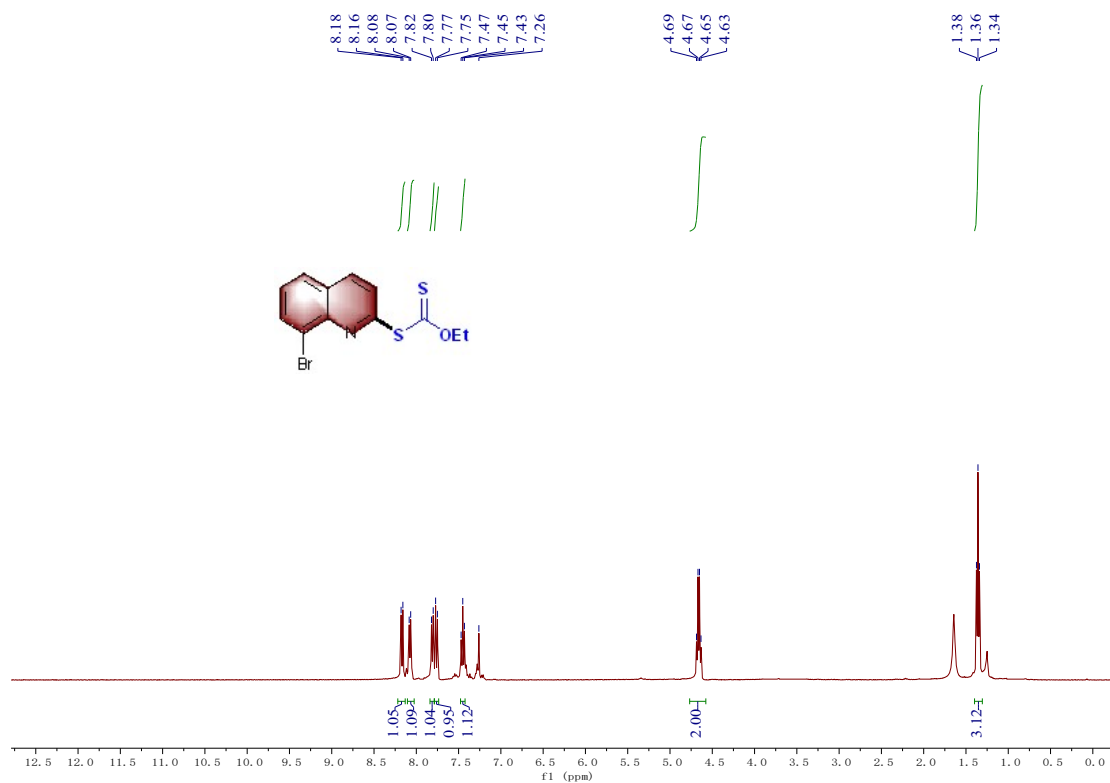

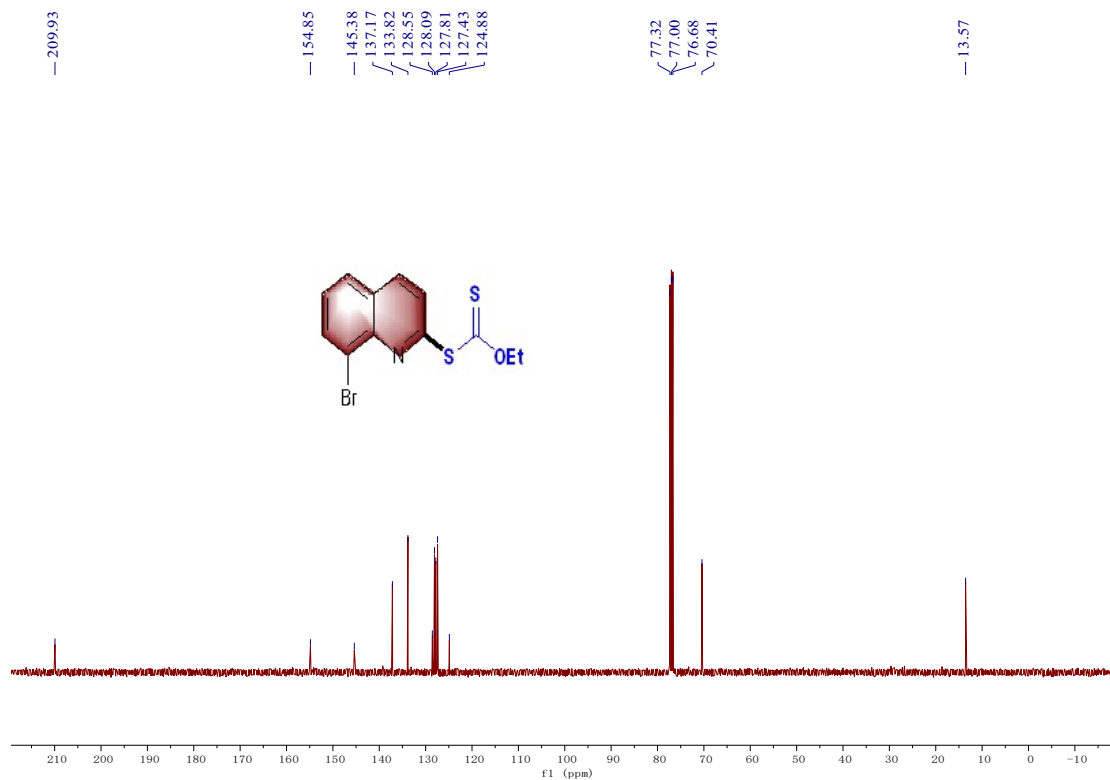

<sup>13</sup>C spectra of 30a

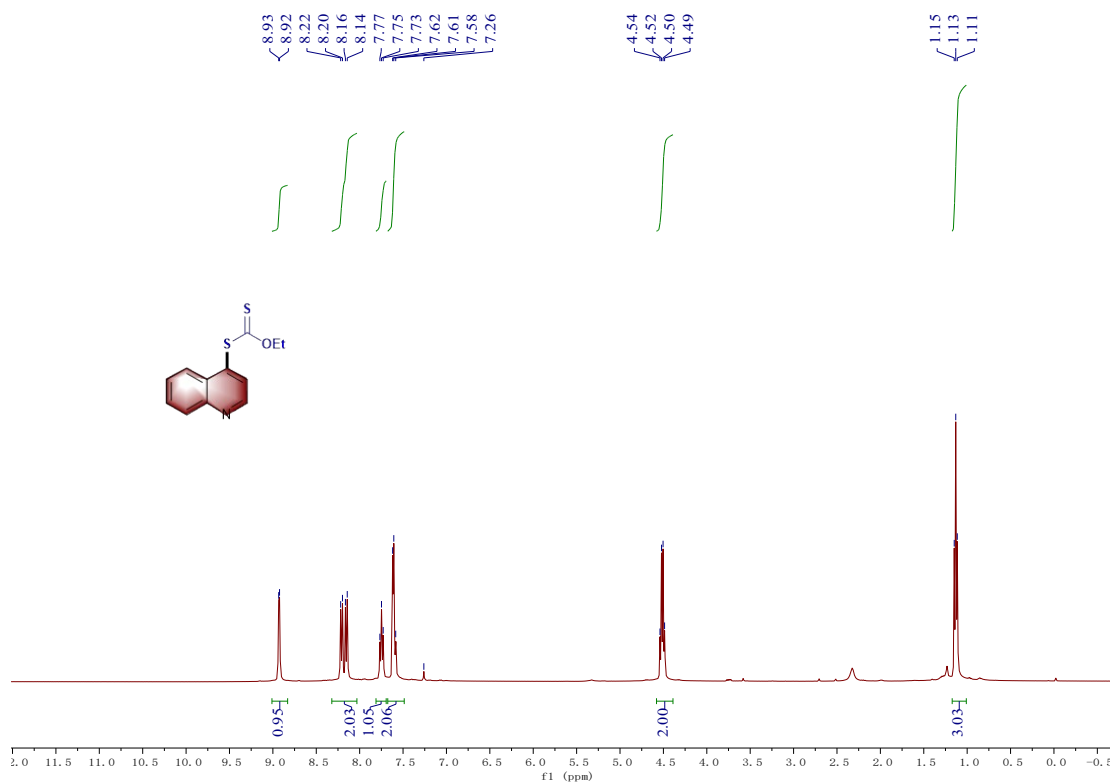

<sup>1</sup>H spectra of 30a



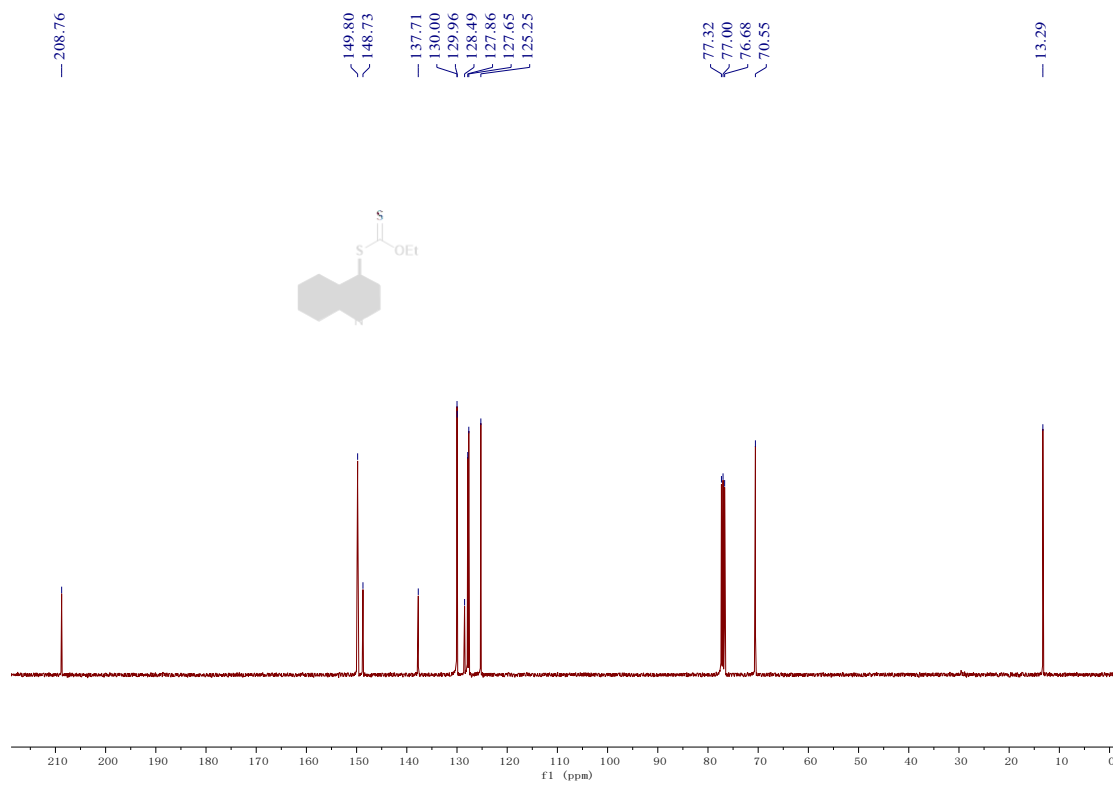

$^{13}\text{C}$  spectra of 3pa

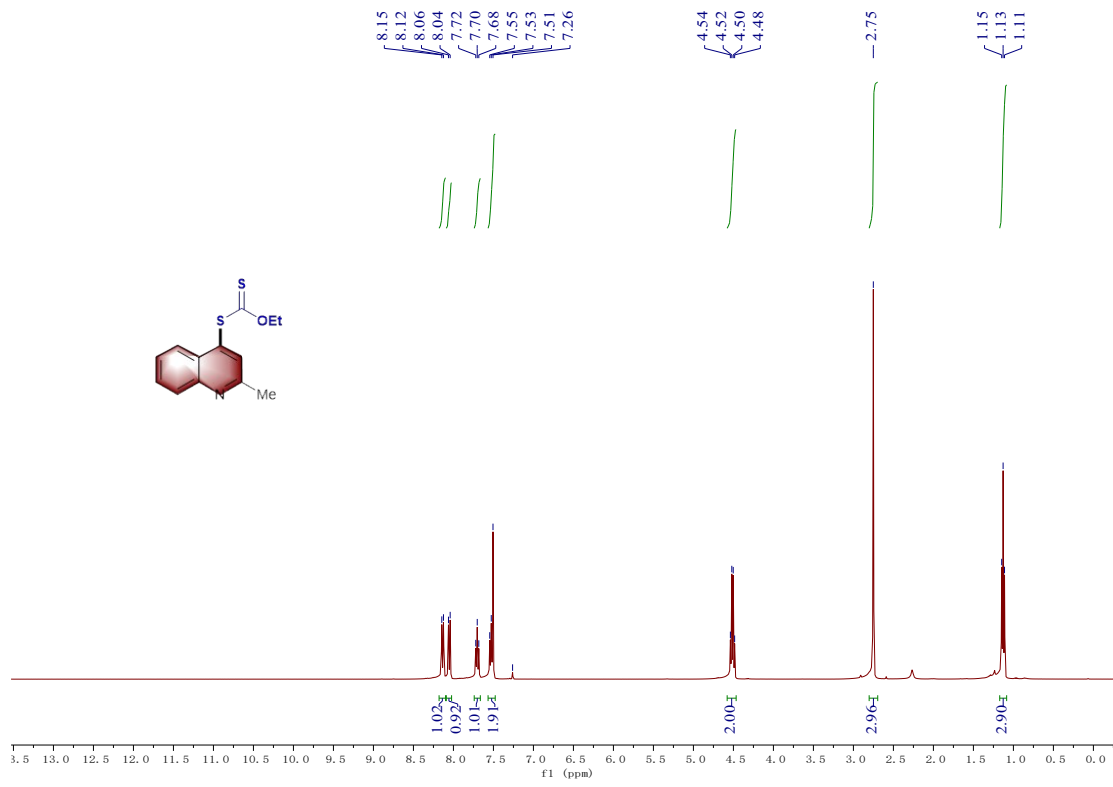

$^1\text{H}$  spectra of 3qa

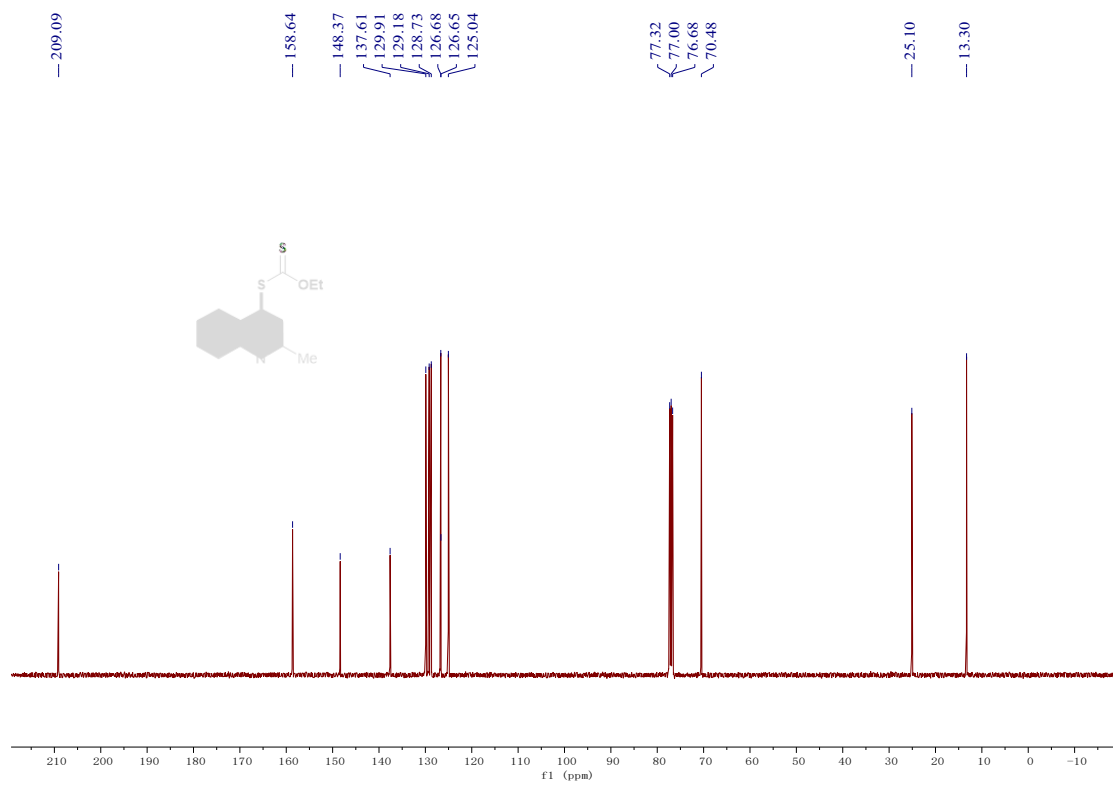

$^{13}\text{C}$  spectra of 3qa

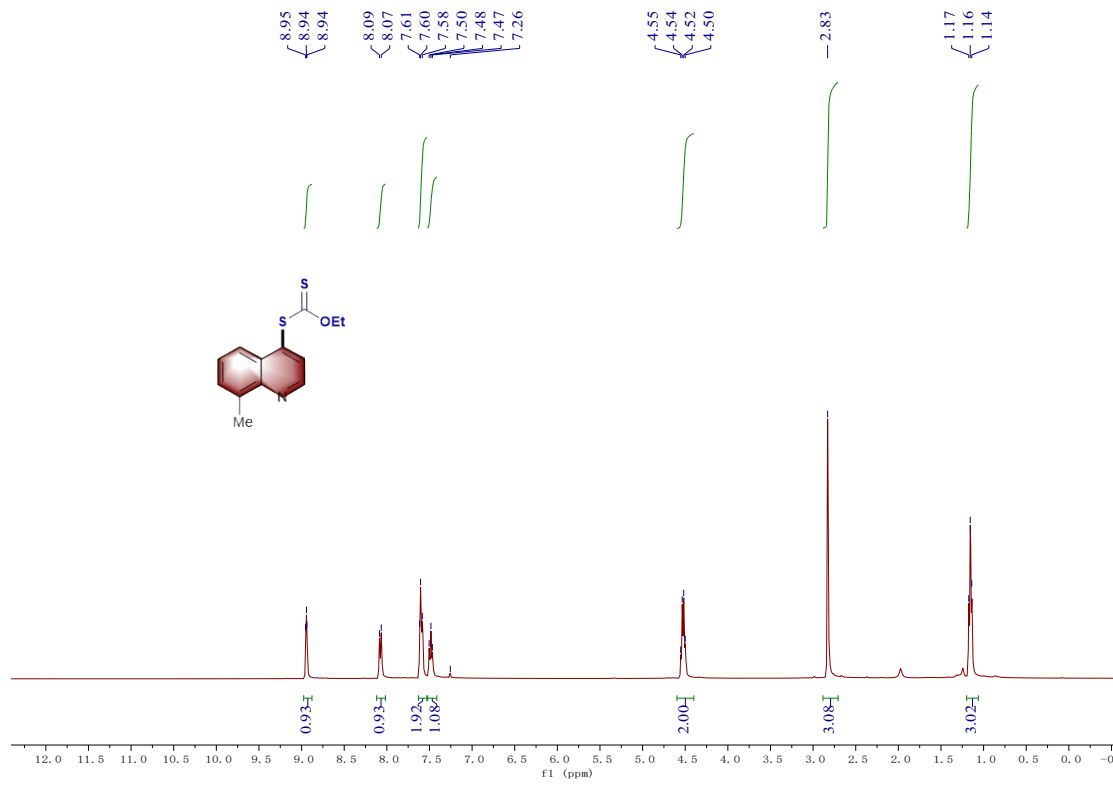

$^1\text{H}$  spectra of 3ra

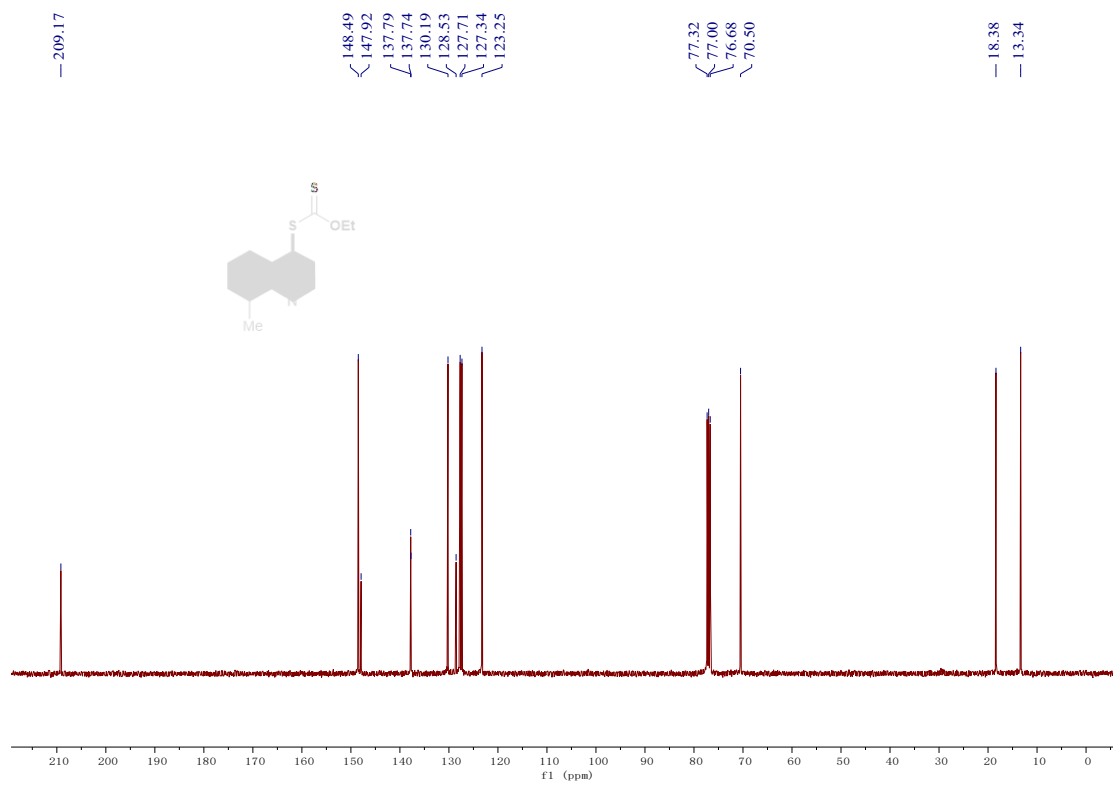

<sup>13</sup>C spectra of 3ra

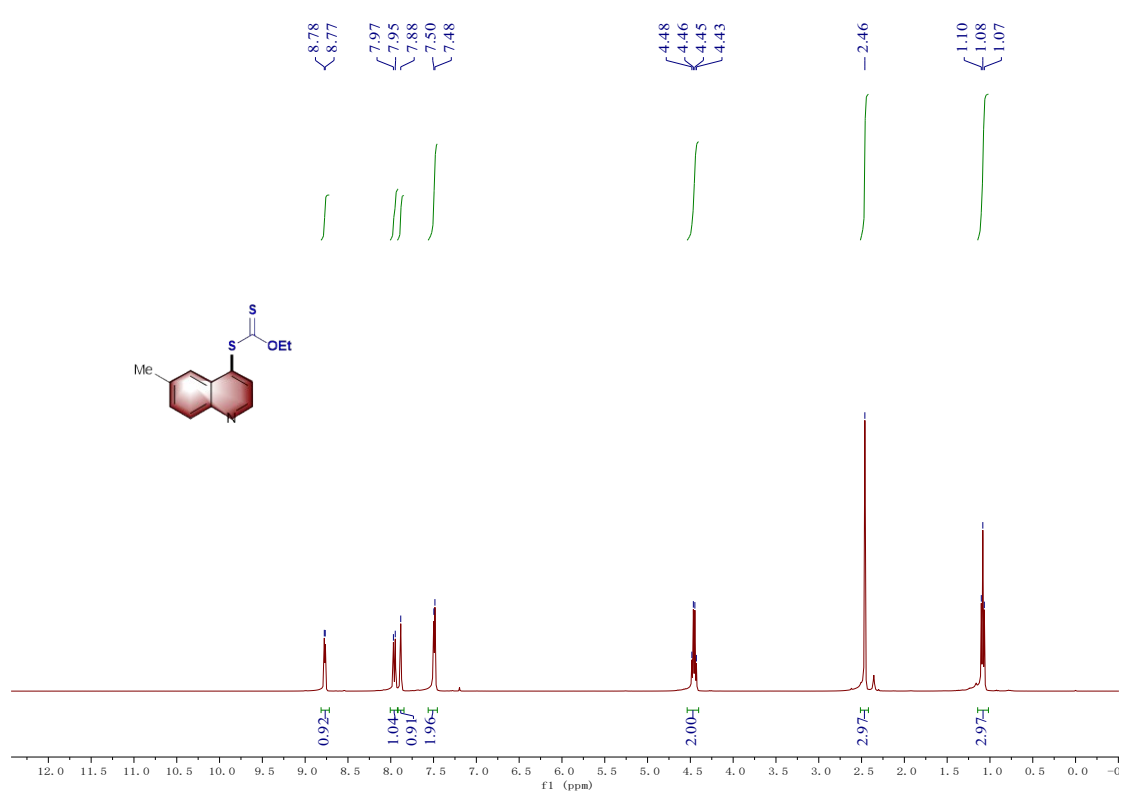

<sup>1</sup>H spectra of 3sa

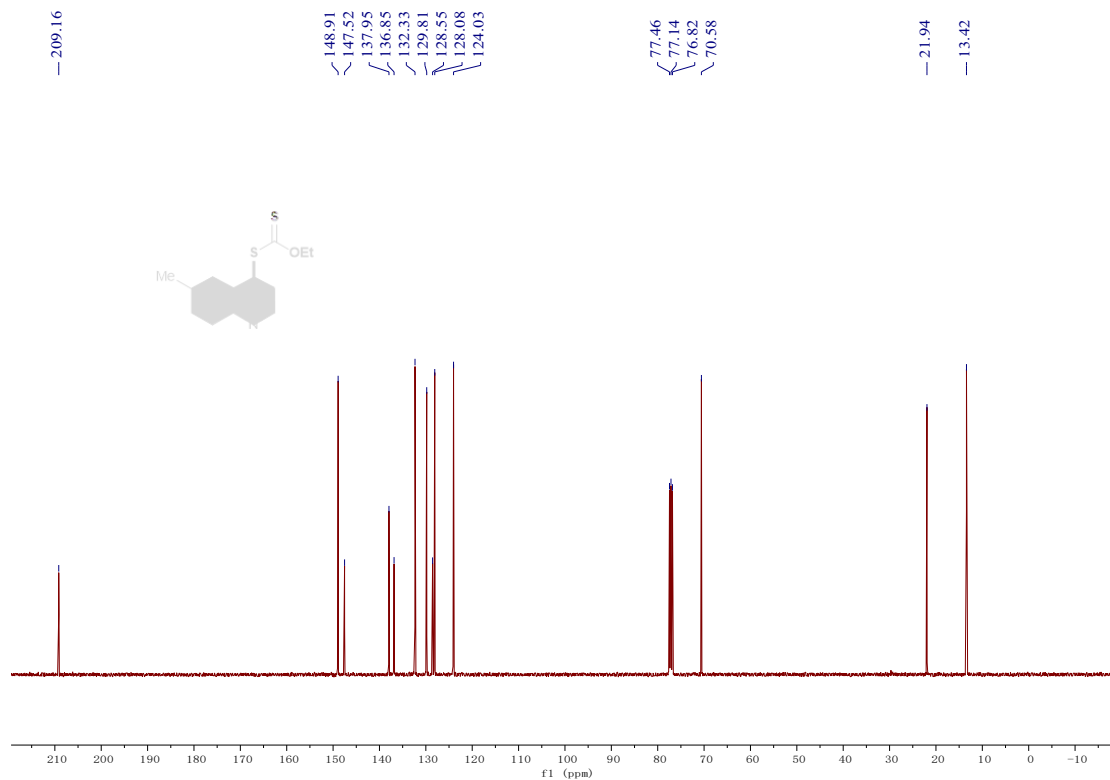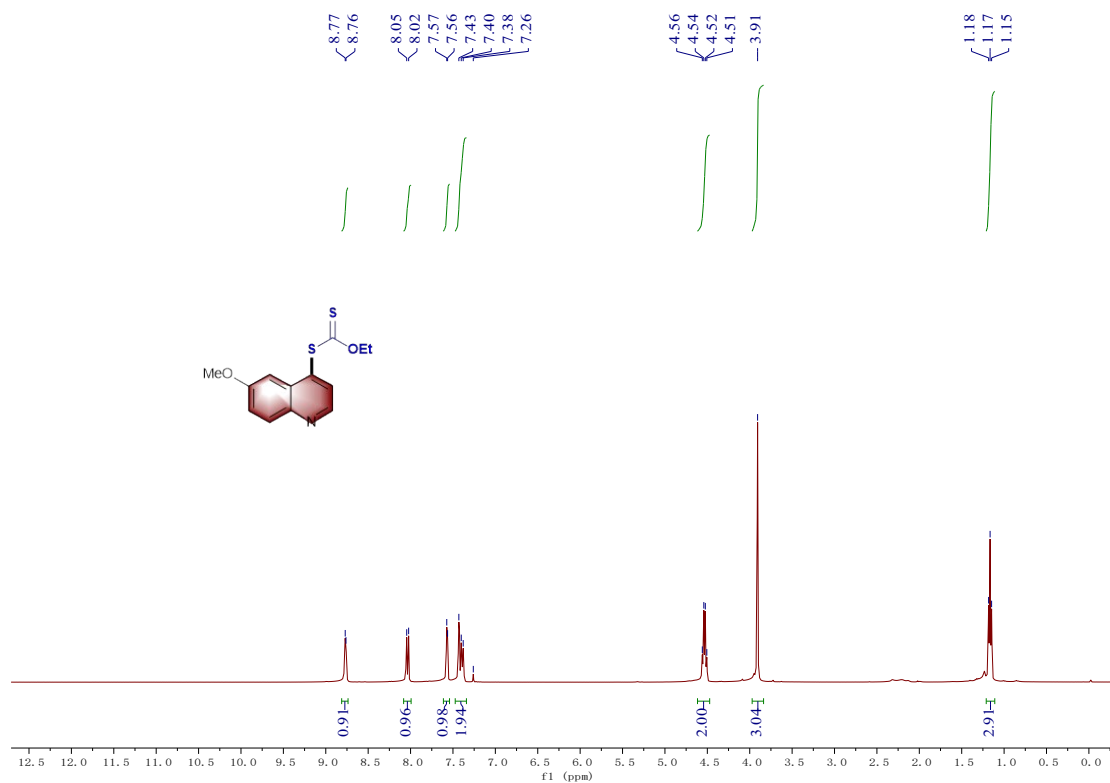

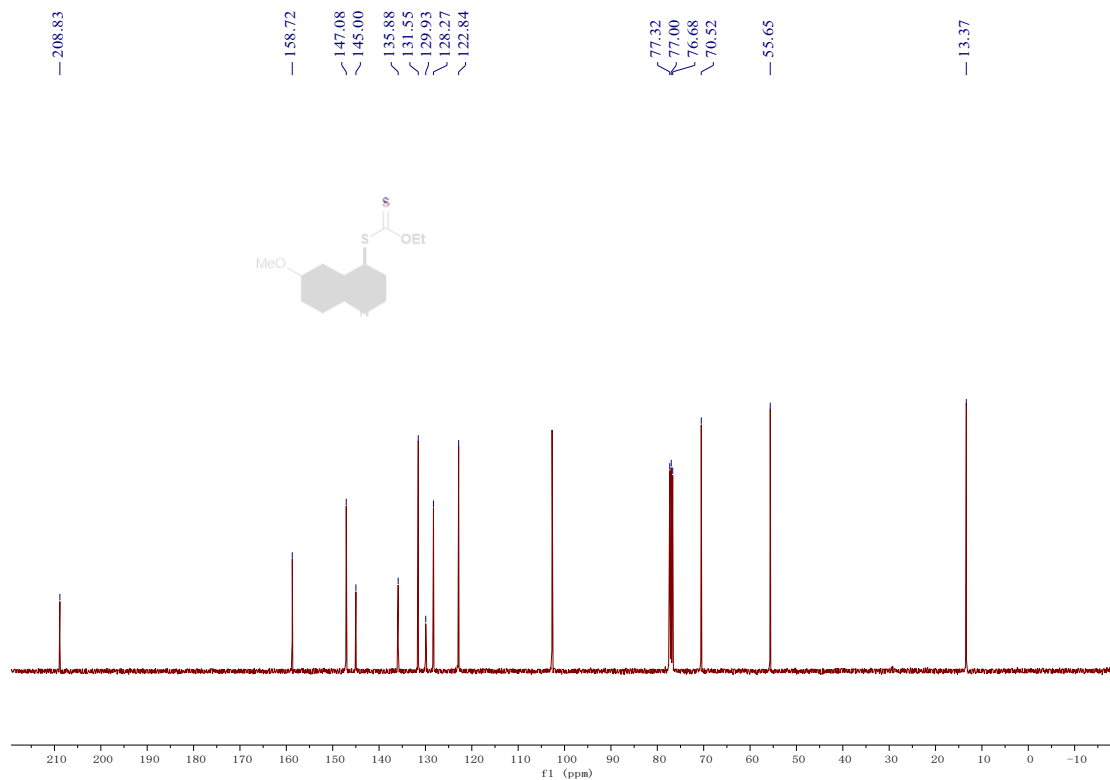

<sup>13</sup>C spectra of **3ta**

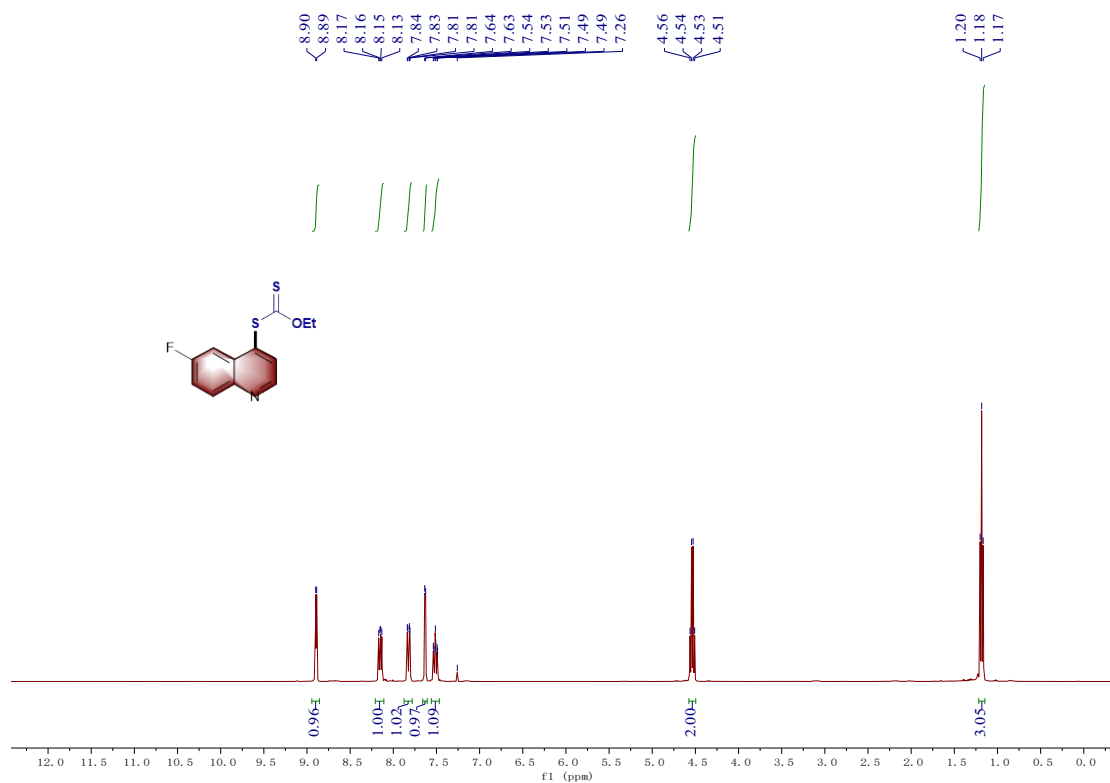

<sup>1</sup>H spectra of **3ua**

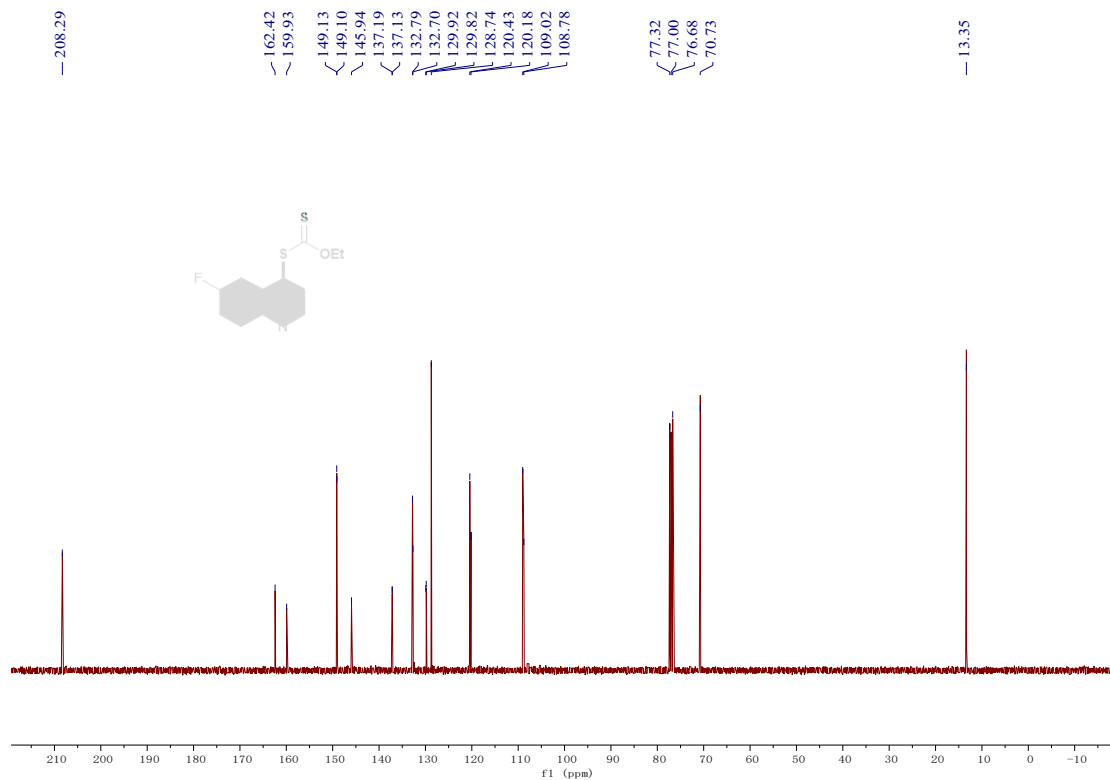

$^{13}\text{C}$  spectra of 3ua

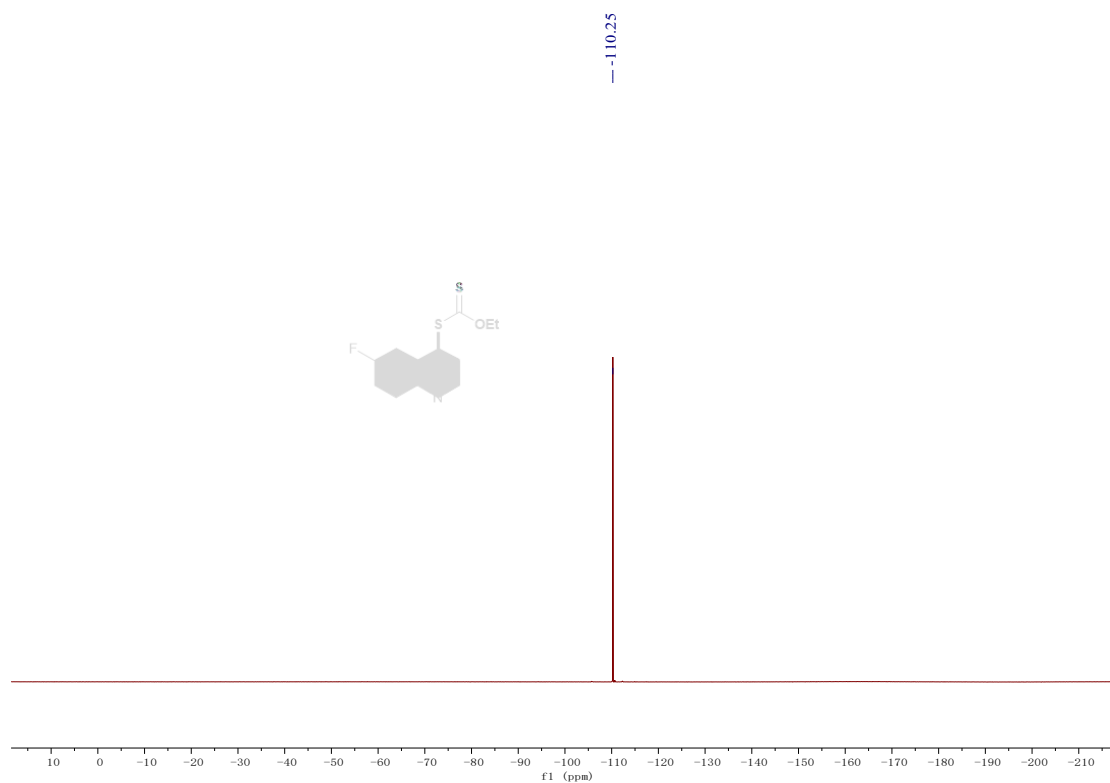

$^{19}\text{F}$  spectra of 3ua

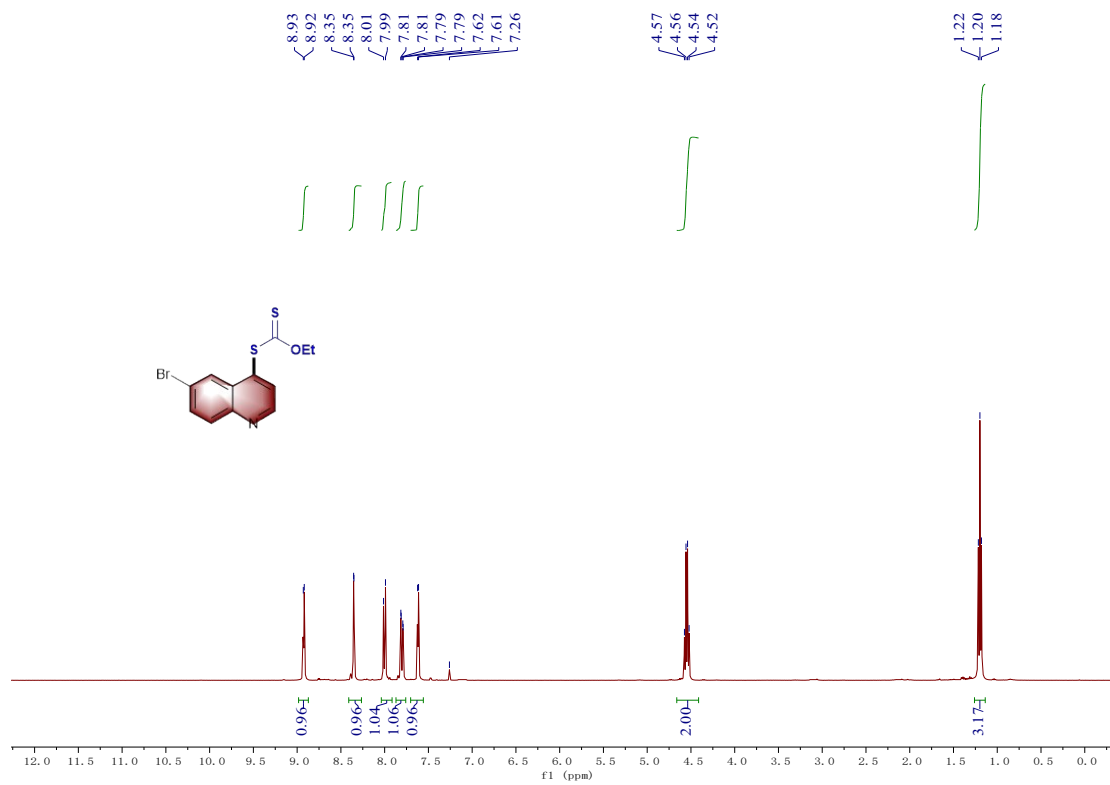

$^1\text{H}$  spectra of 3va

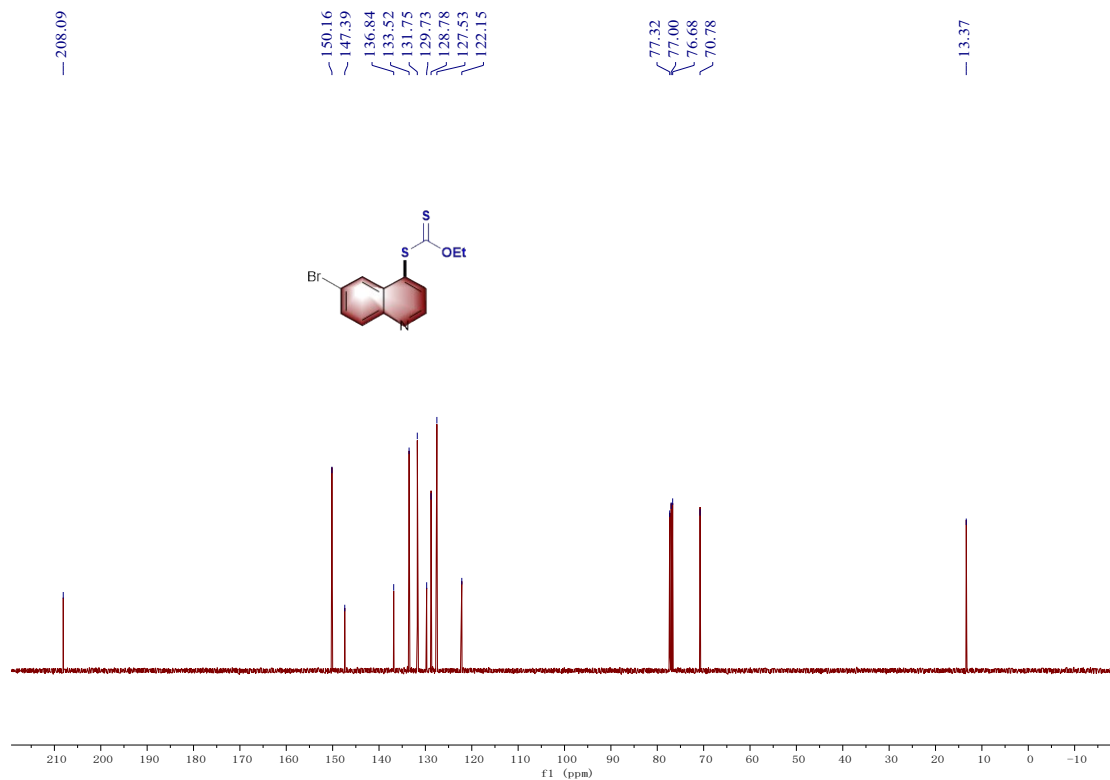

$^{13}\text{C}$  spectra of 3va

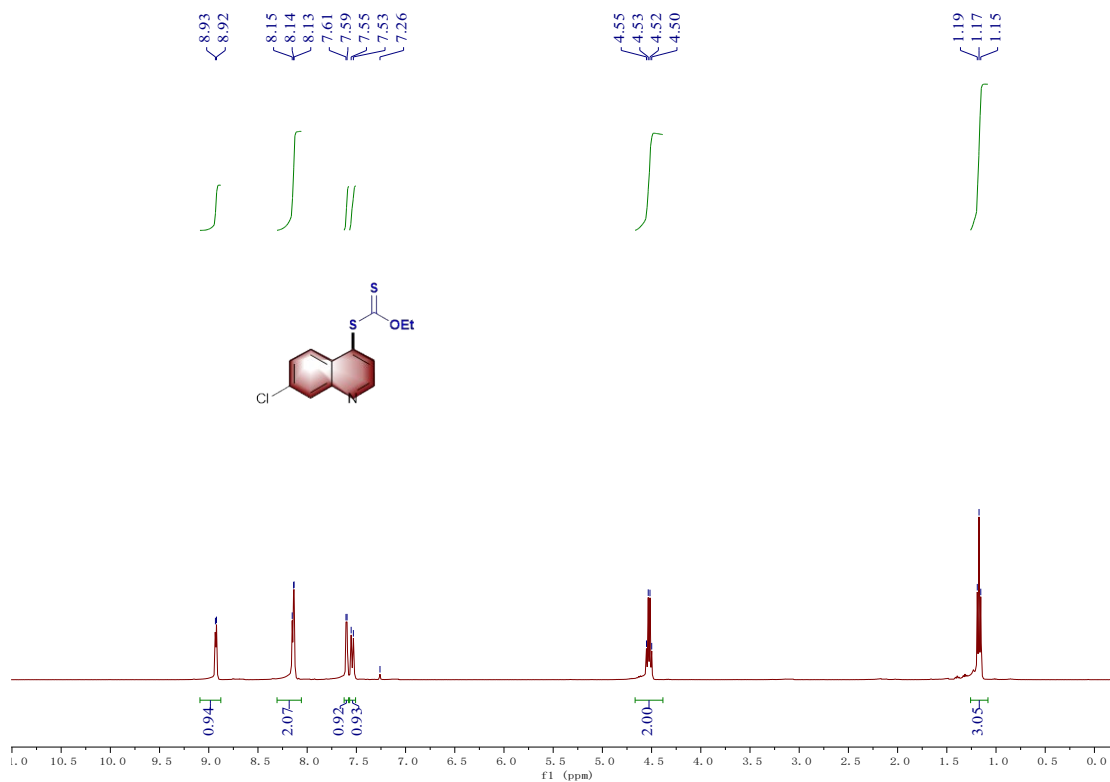

<sup>1</sup>H spectra of 3wa

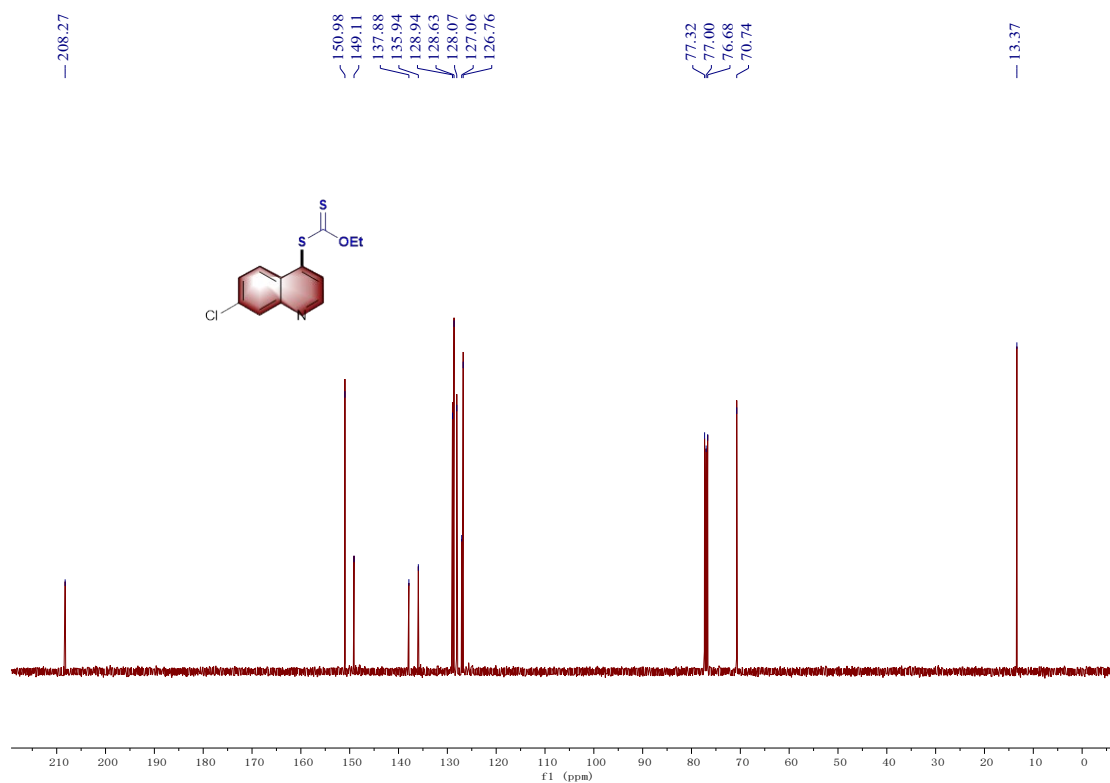

<sup>13</sup>C spectra of 3wa



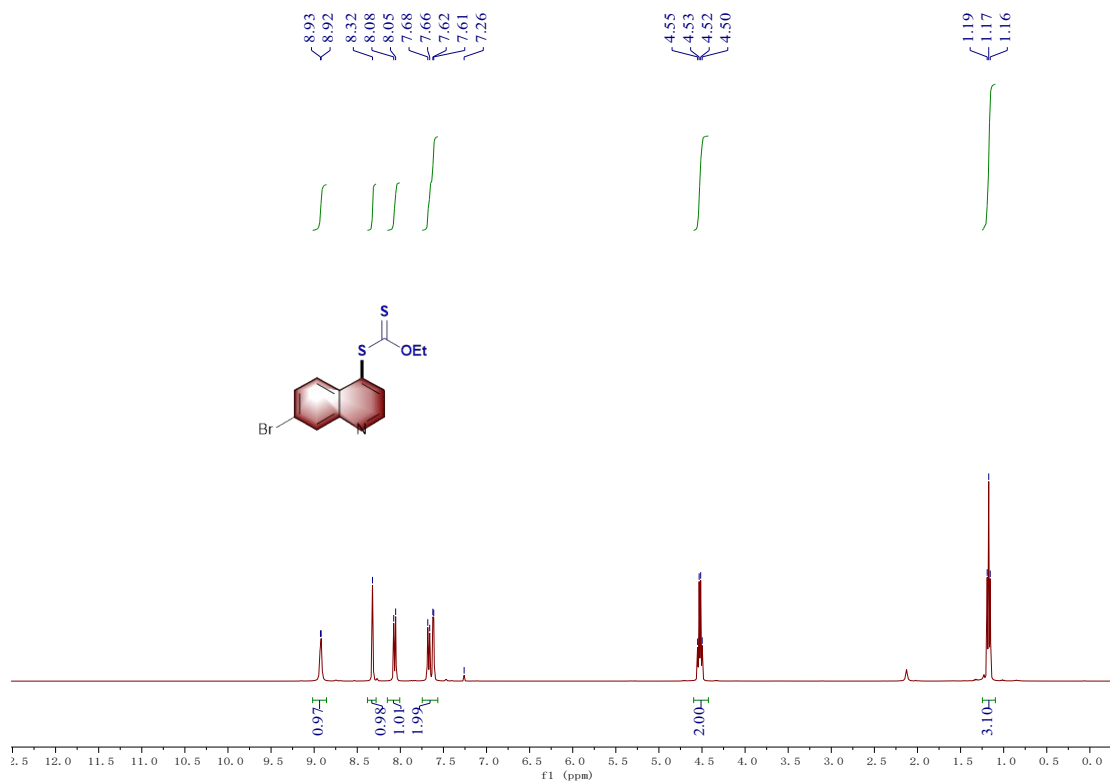

<sup>1</sup>H spectra of 3xa

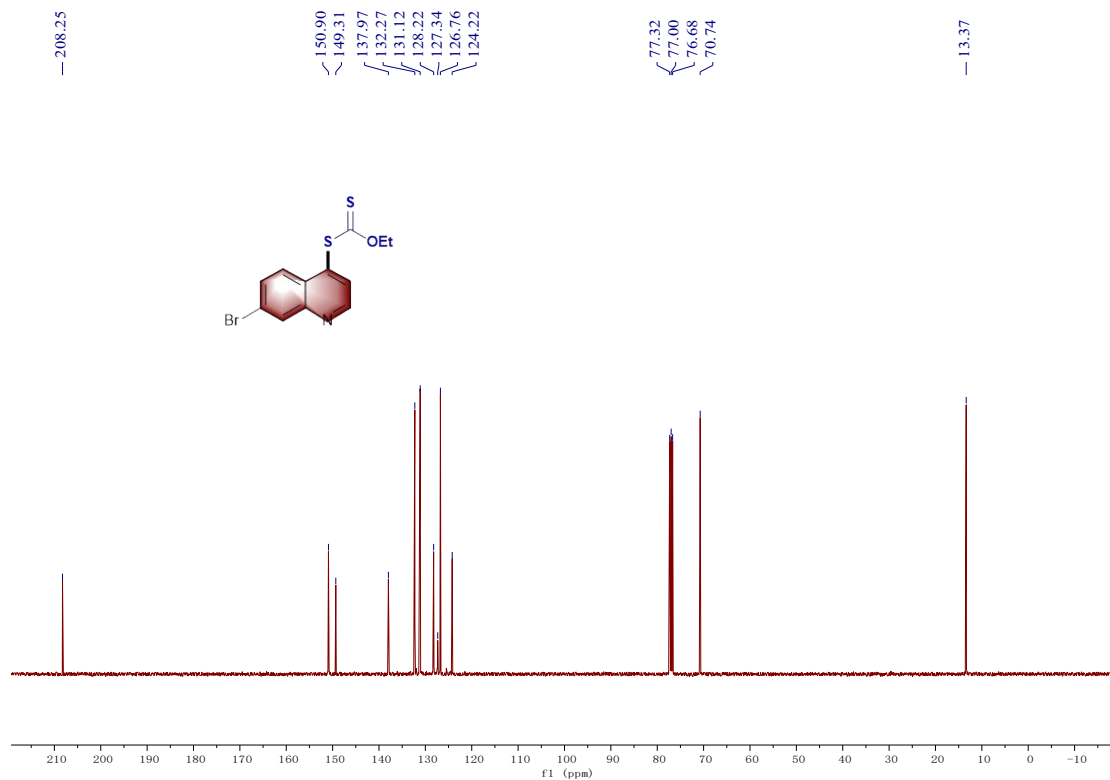

<sup>13</sup>C spectra of 3xa

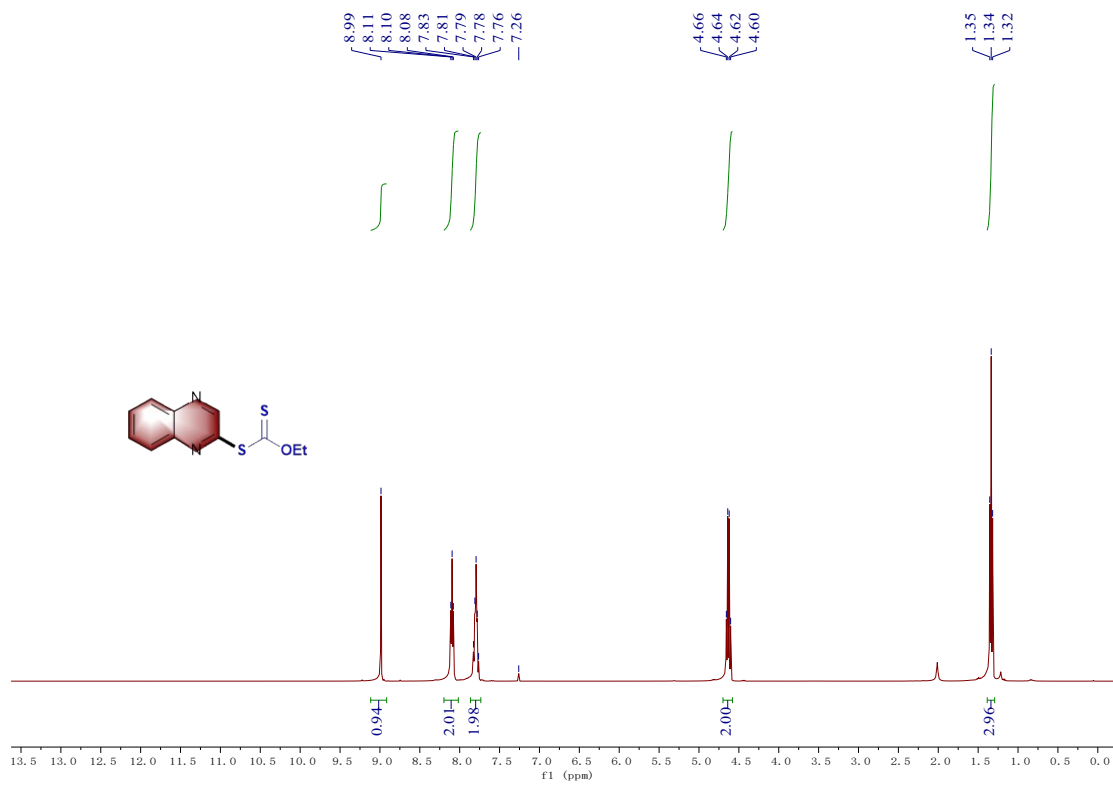

<sup>1</sup>H spectra of 3ya

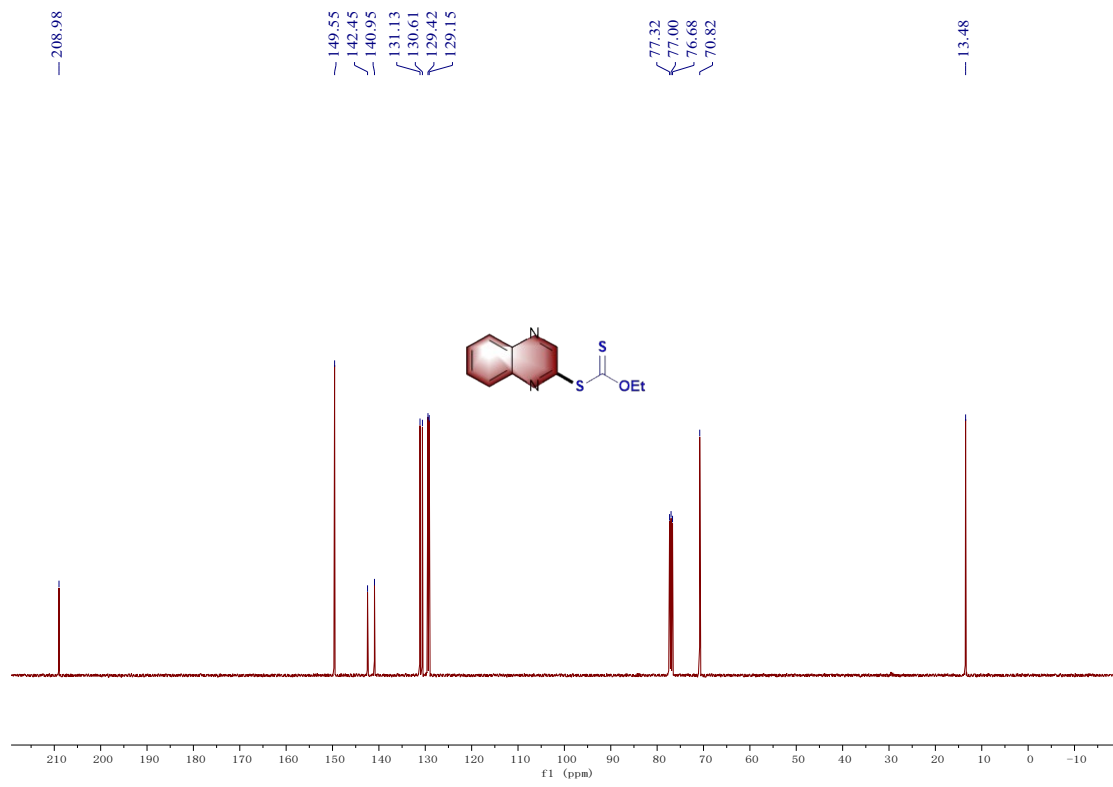

<sup>13</sup>C spectra of 3ya

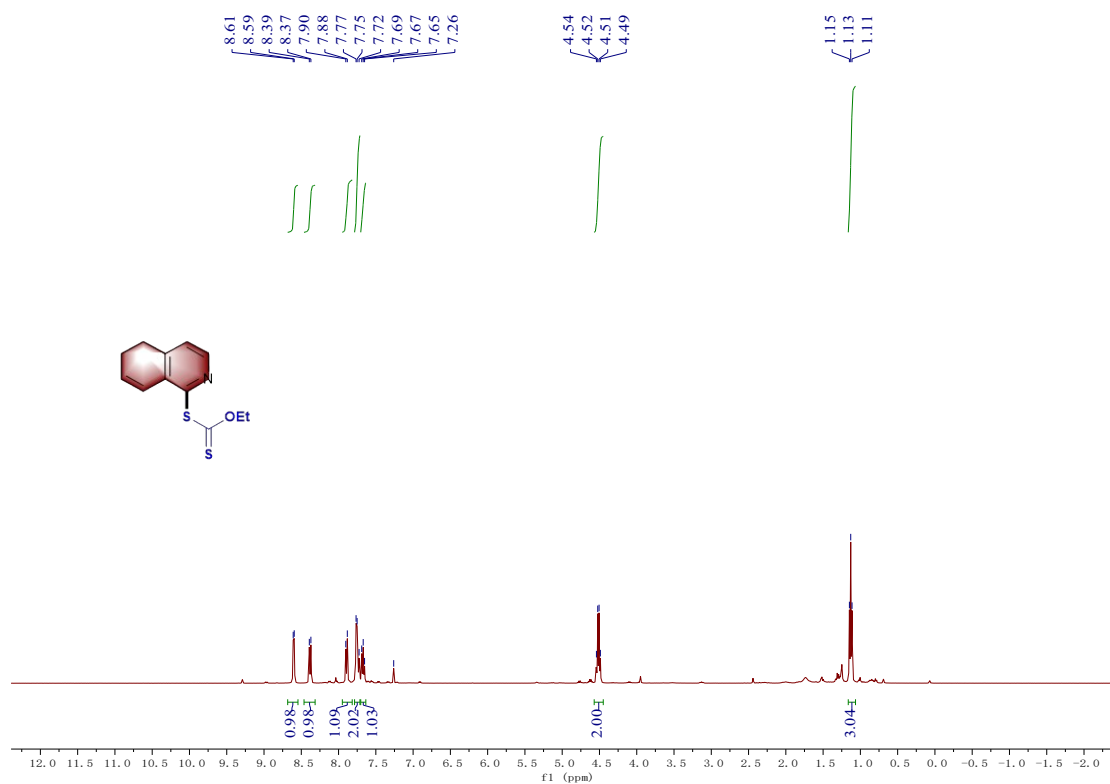

<sup>1</sup>H spectra of 3za

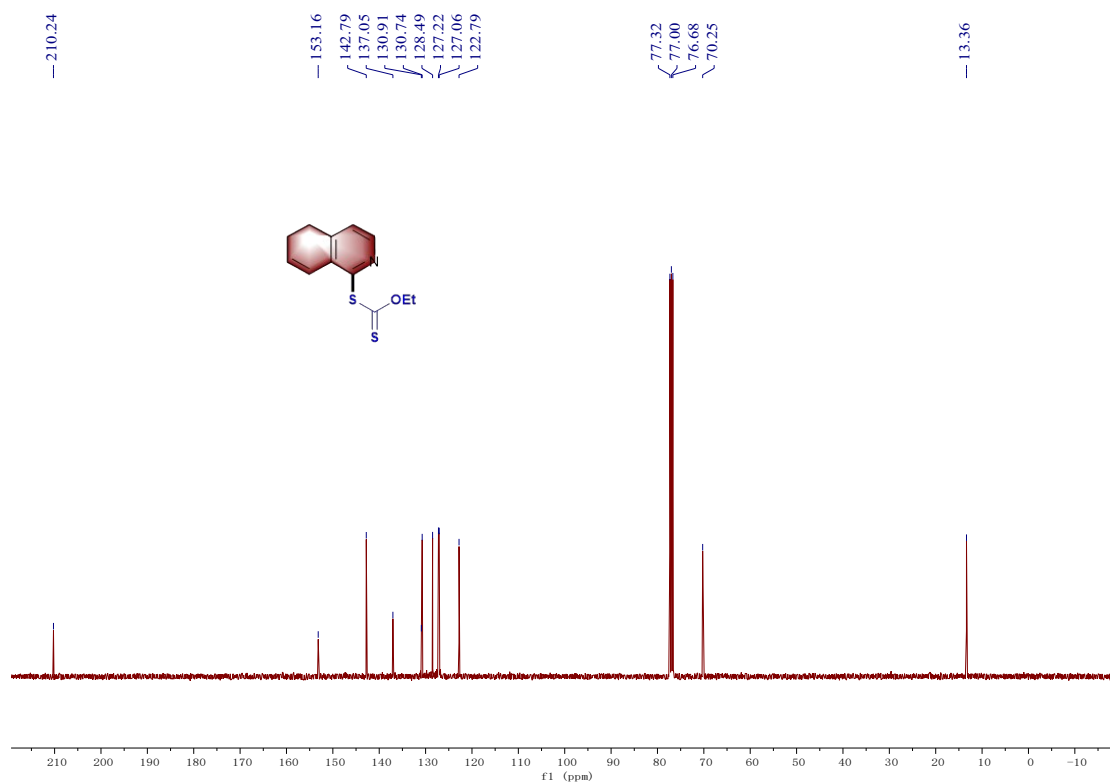

<sup>13</sup>C spectra of 3za

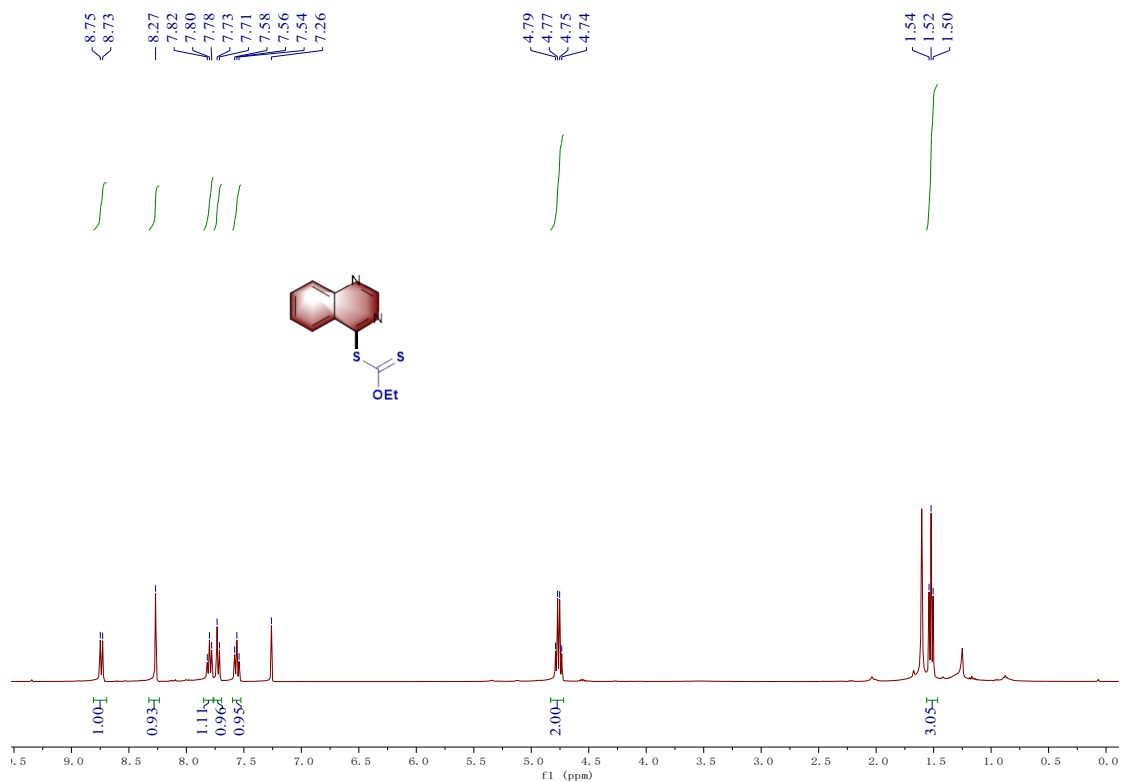

$^1\text{H}$  spectra of 4aa

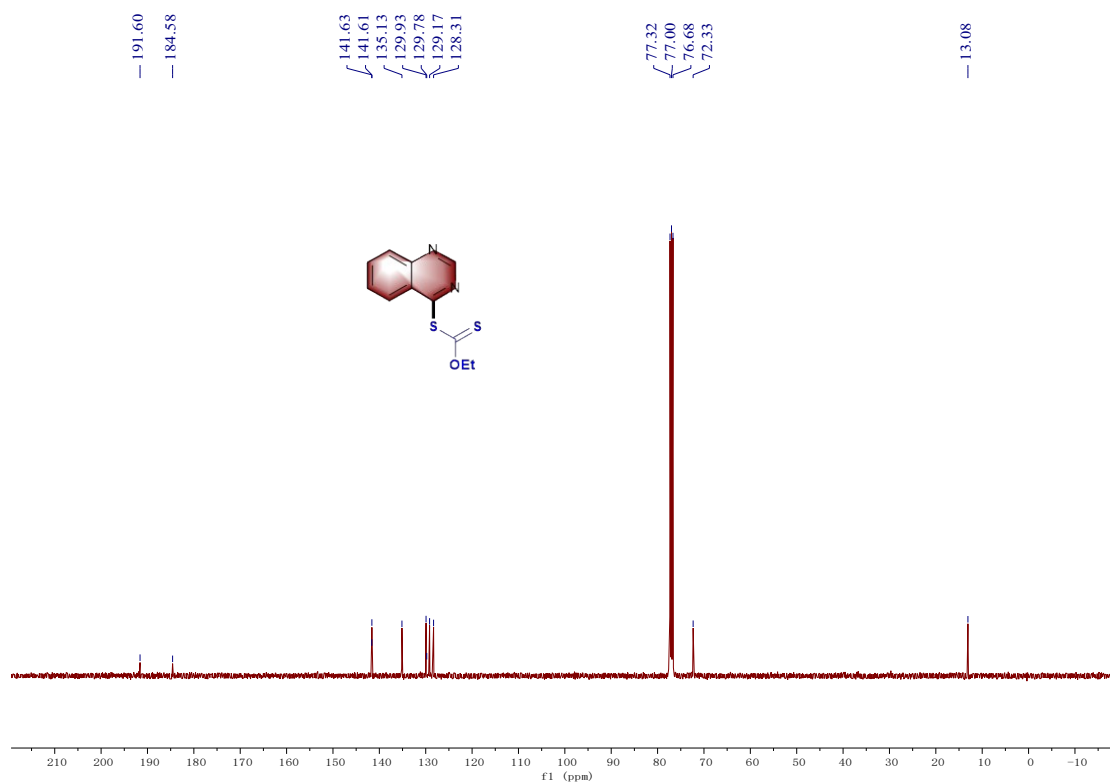

$^{13}\text{C}$  spectra of 4aa

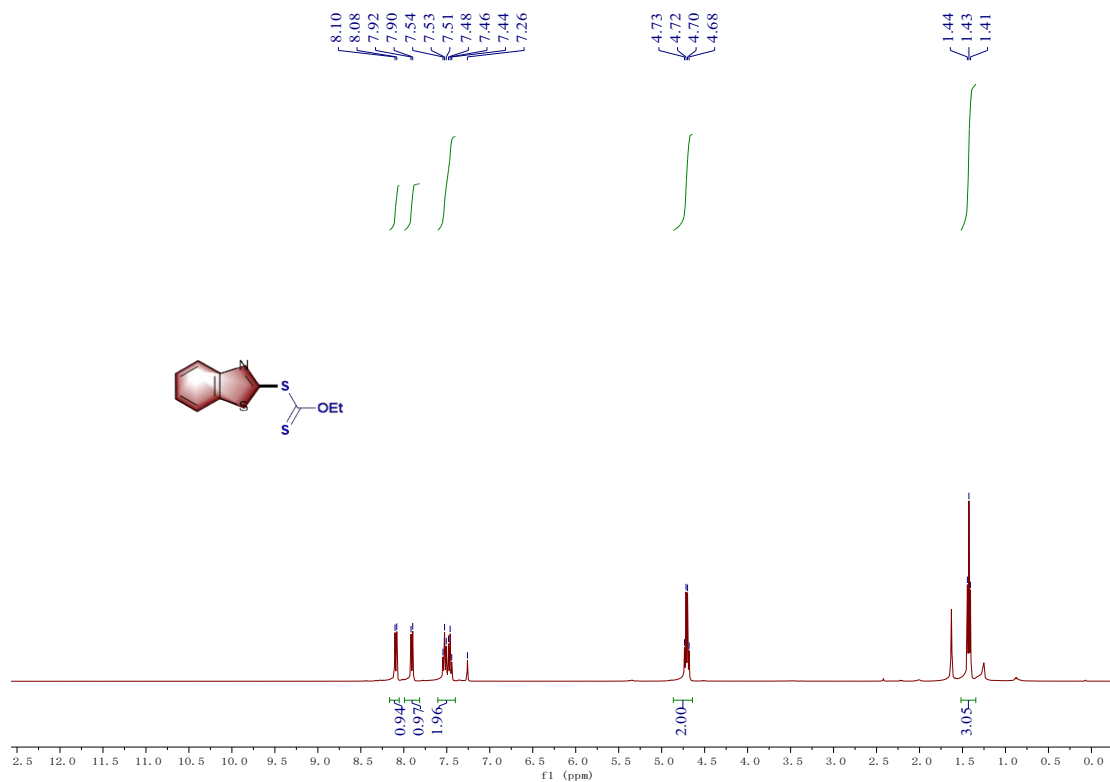

$^1\text{H}$  spectra of 4ba

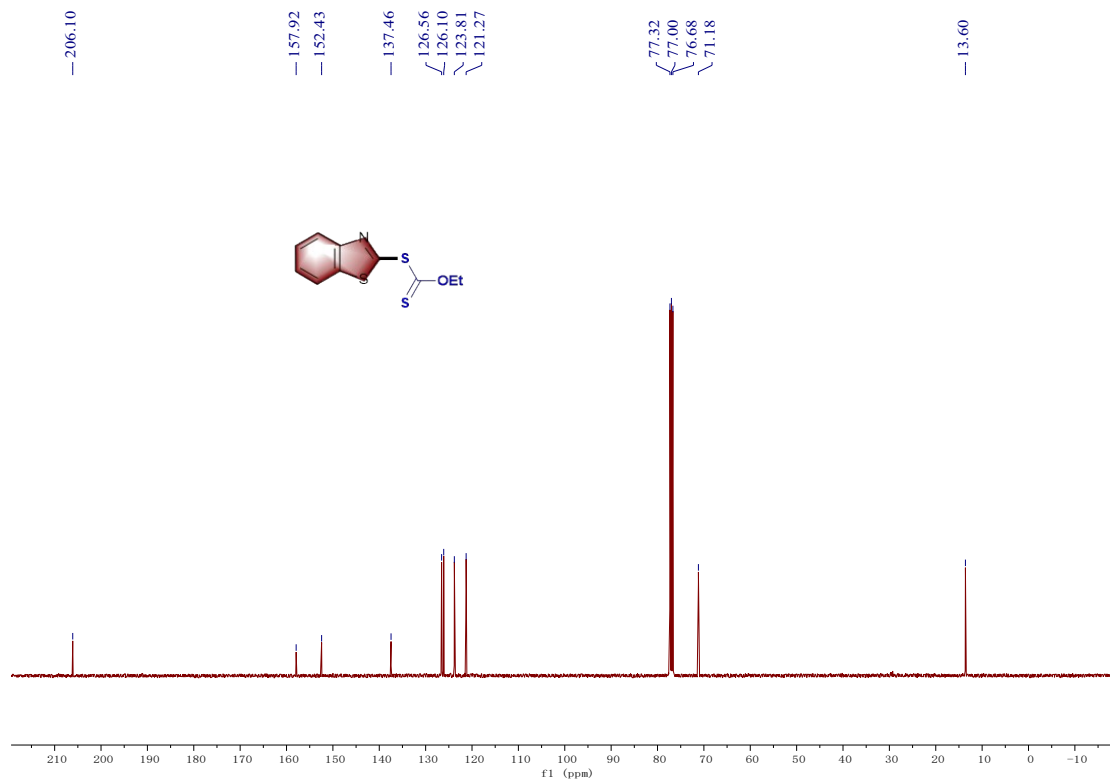

$^{13}\text{C}$  spectra of 4ba

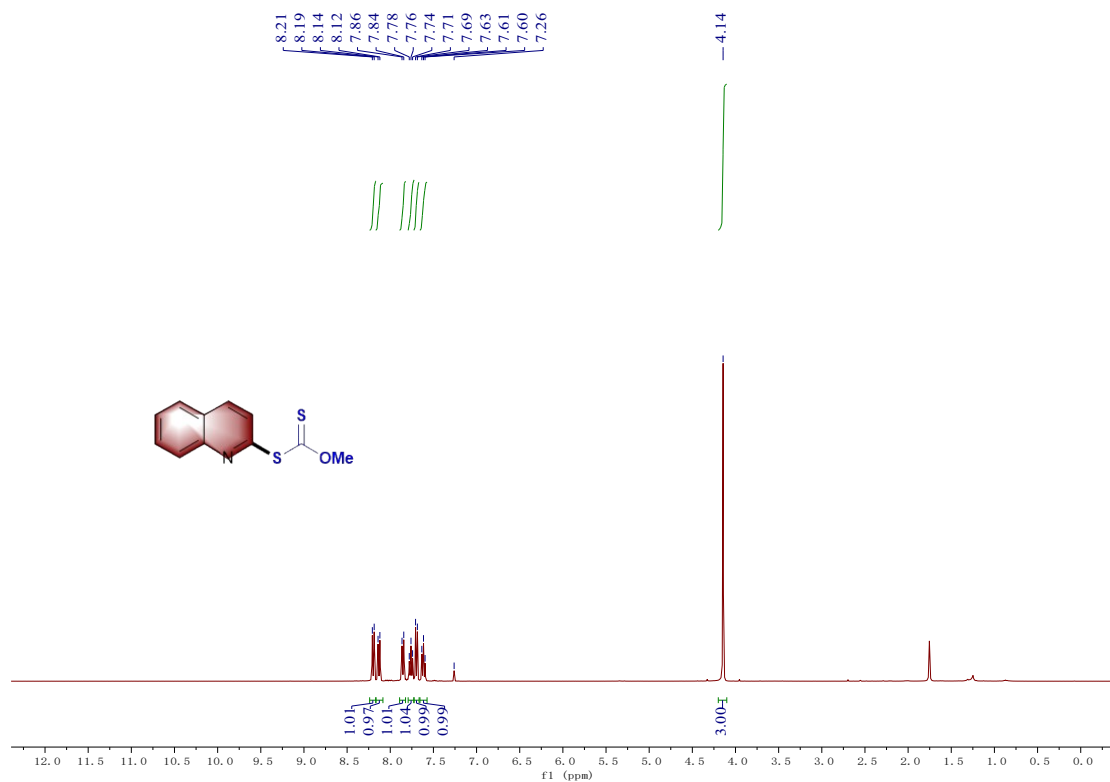

<sup>1</sup>H spectra of 3ab

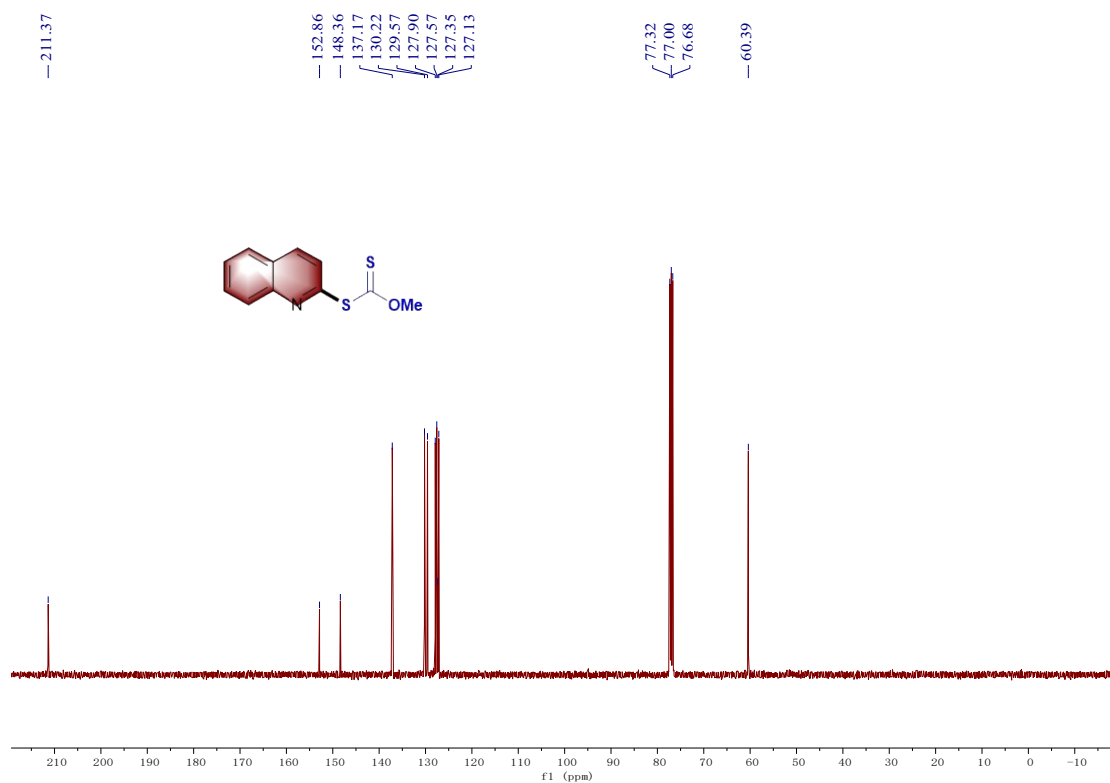

<sup>13</sup>C spectra of 3ab

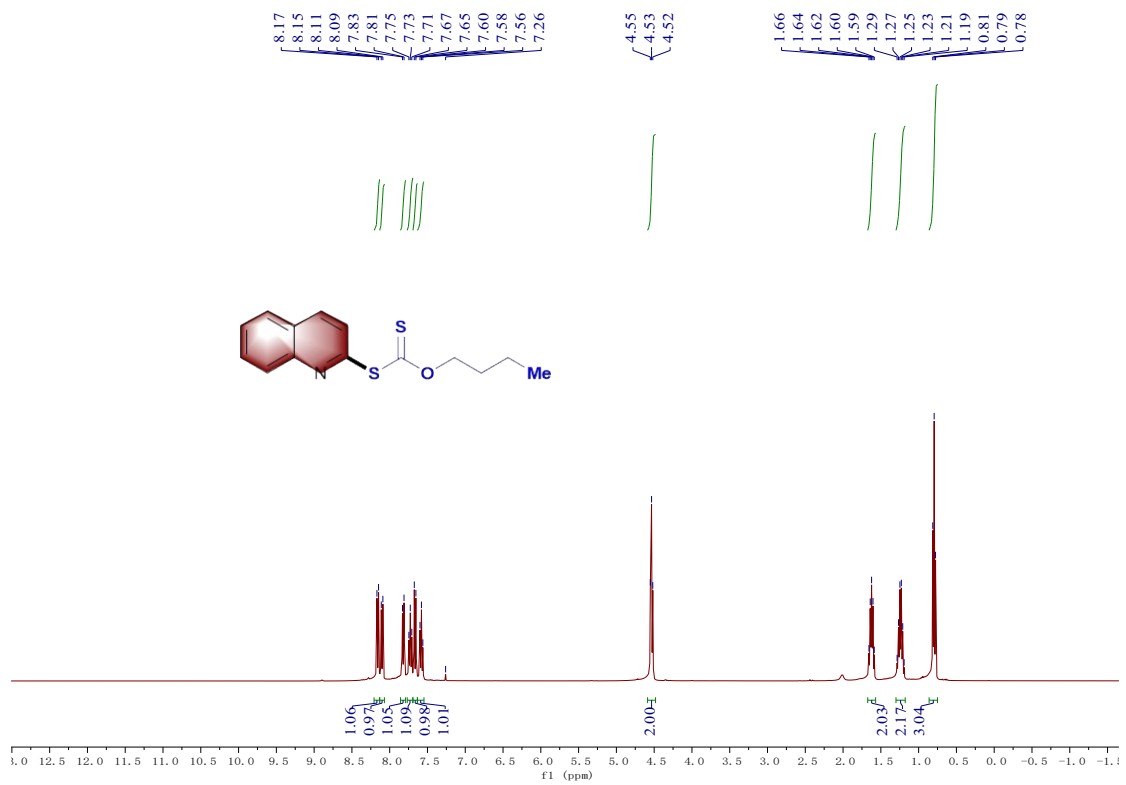

<sup>1</sup>H spectra of 3ac

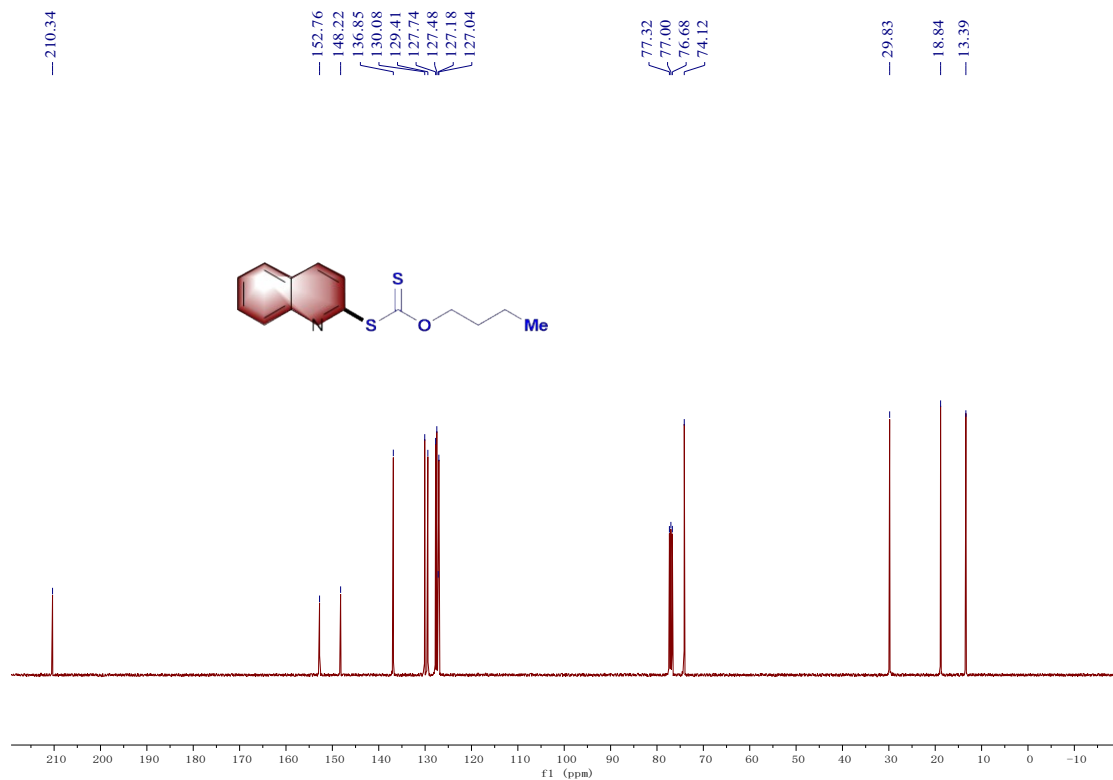

<sup>13</sup>C spectra of 3ac

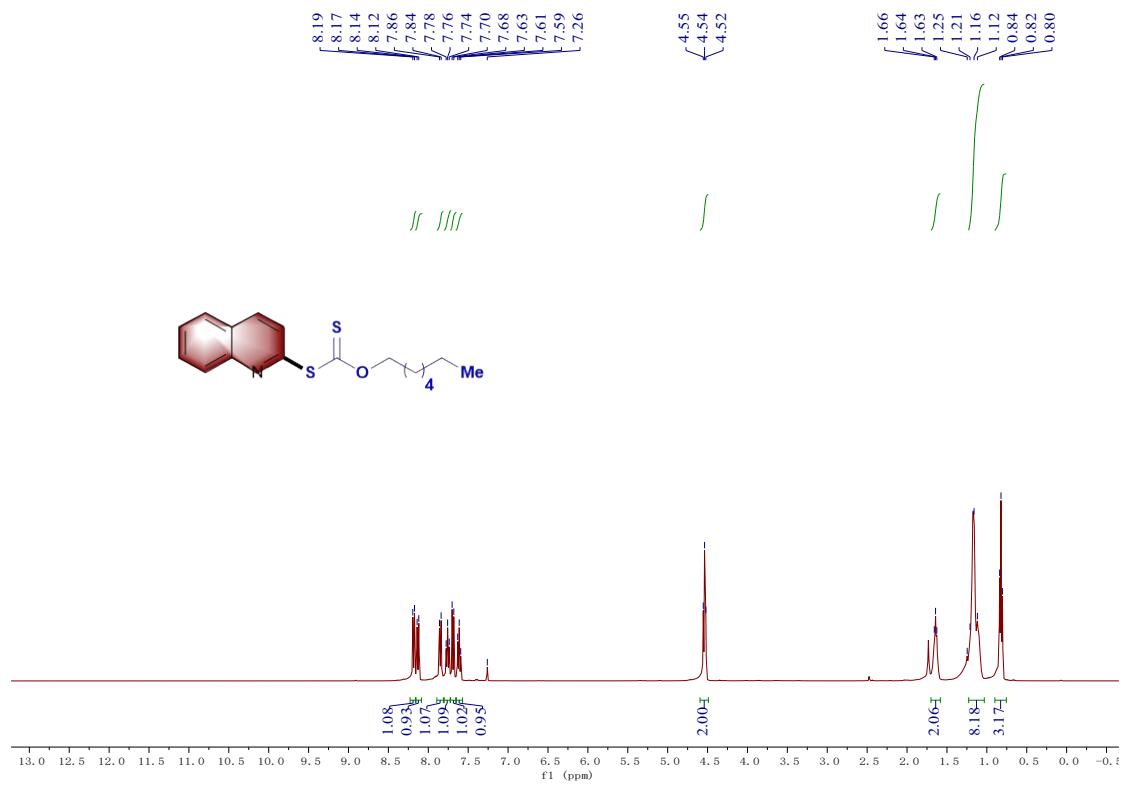

<sup>1</sup>H spectra of 3ad

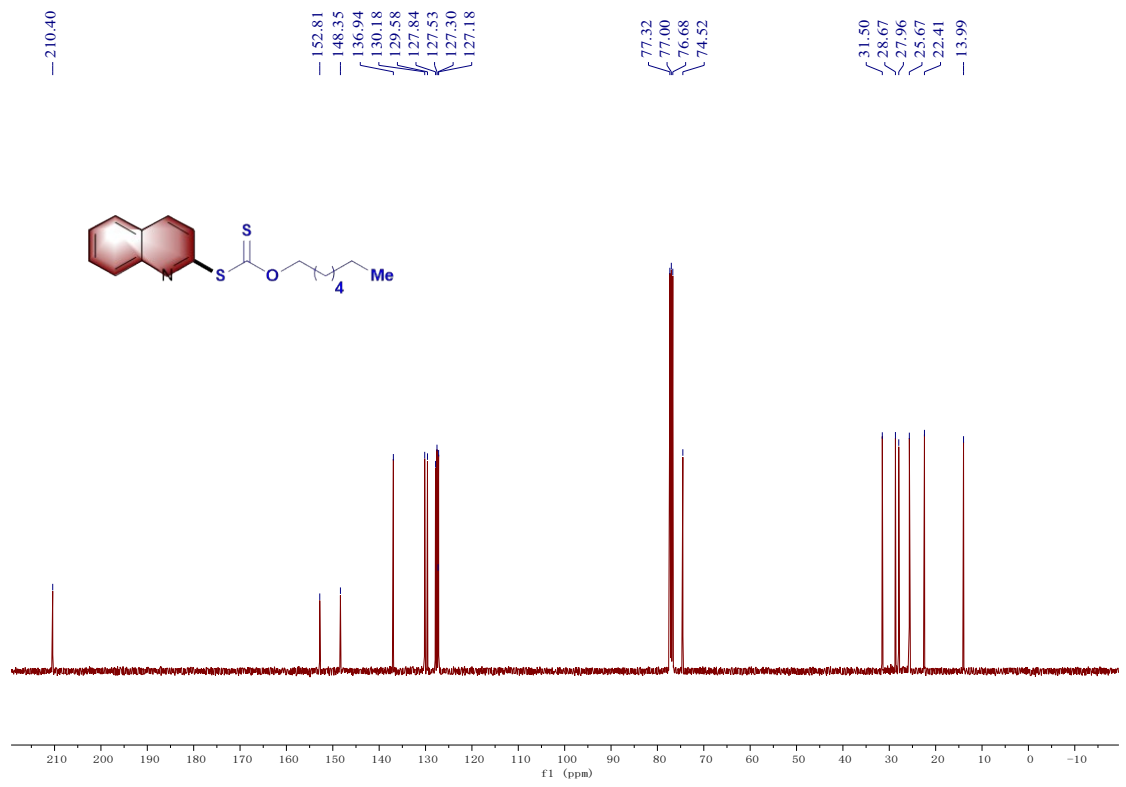

<sup>13</sup>C spectra of 3ad



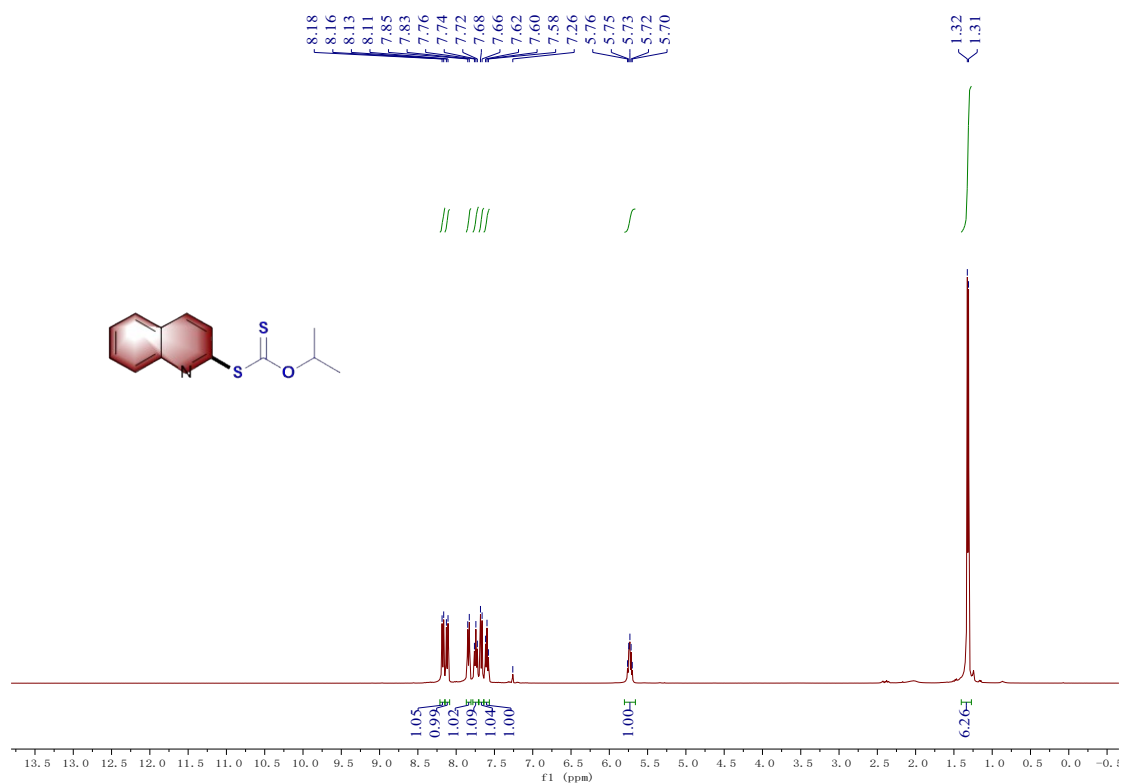

$^1\text{H}$  spectra of 3ae

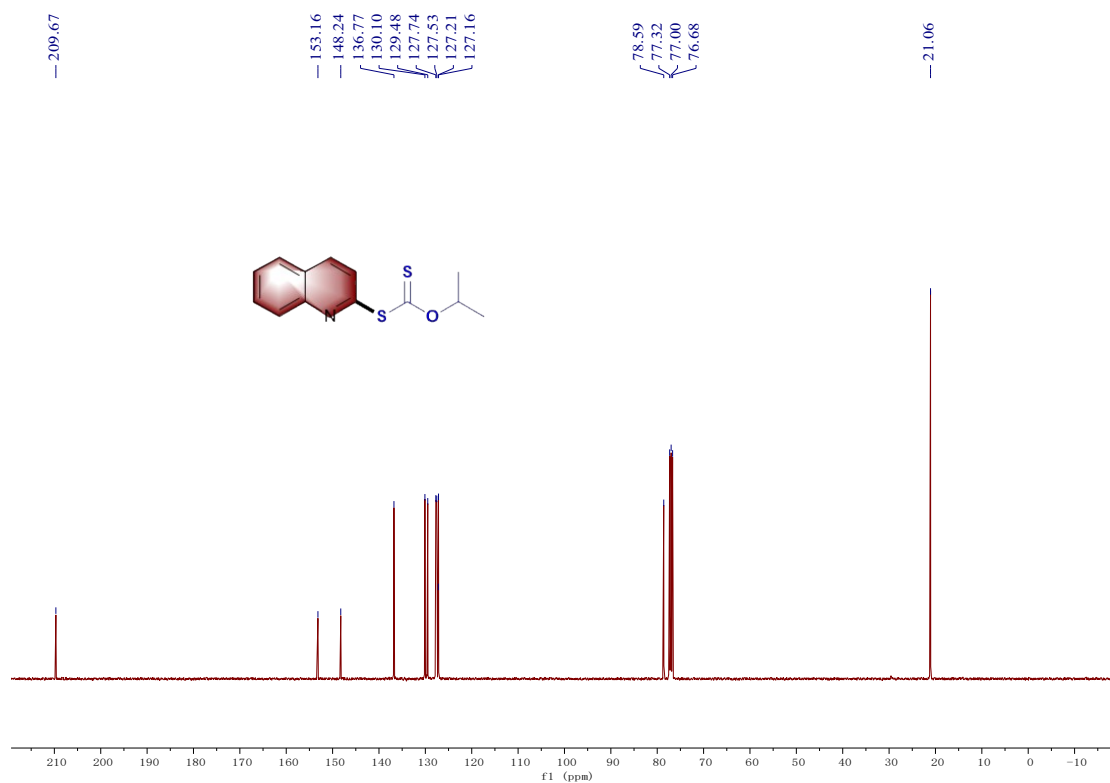

$^{13}\text{C}$  spectra of 3ae

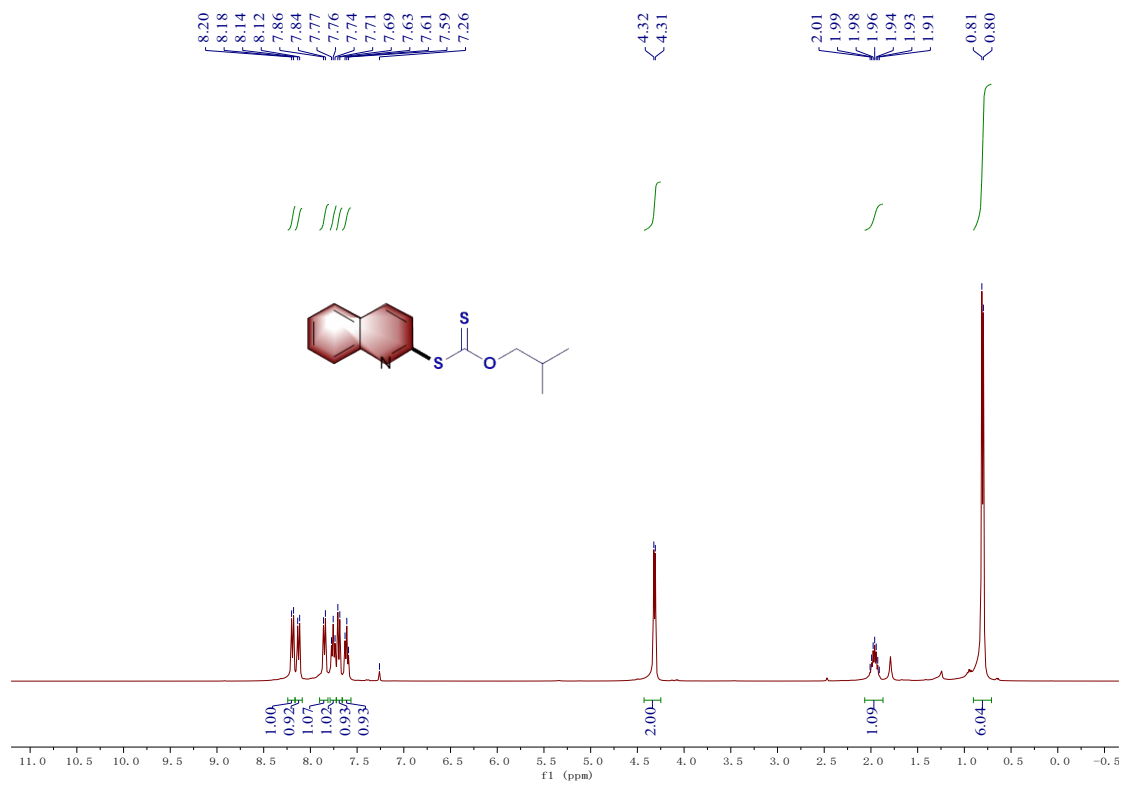

<sup>1</sup>H spectra of 3af

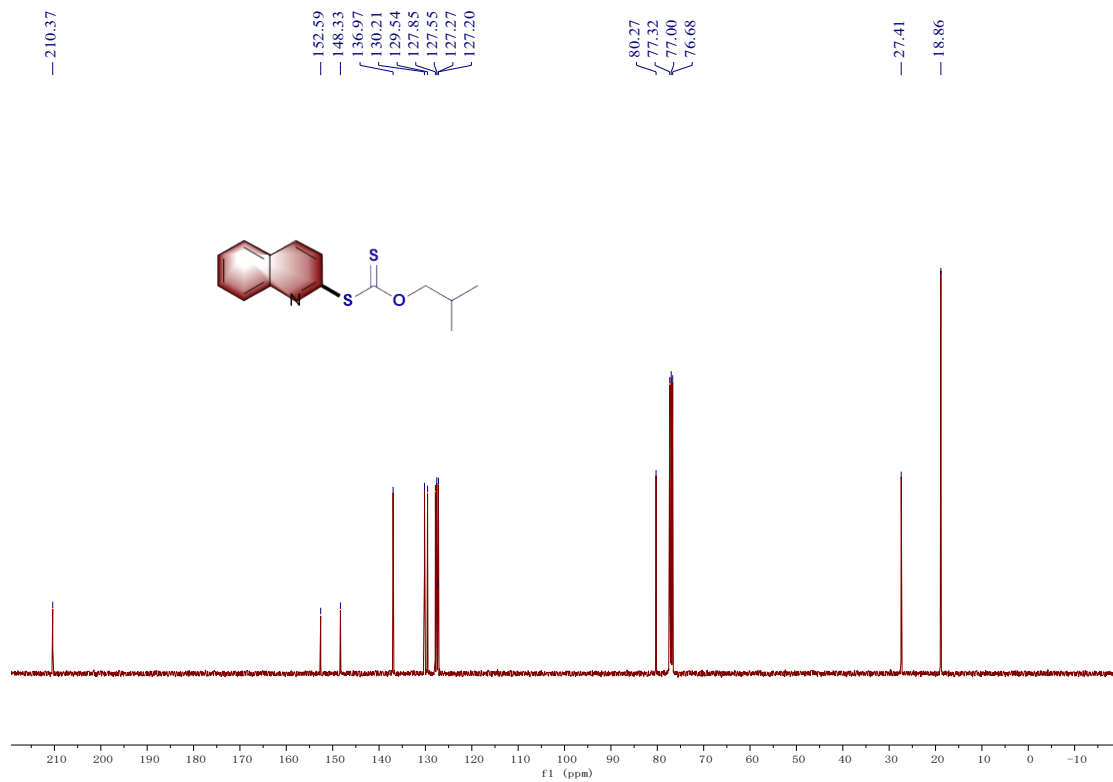

<sup>13</sup>C spectra of 3af

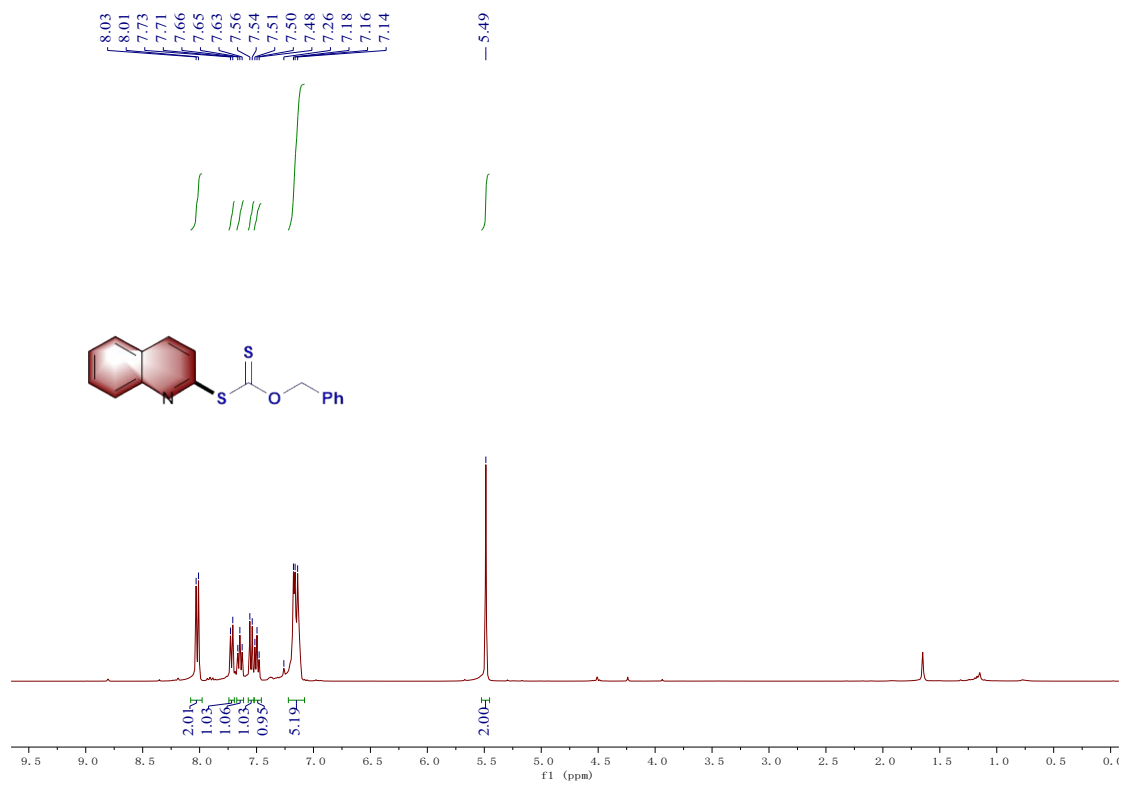

<sup>1</sup>H spectra of 3ag

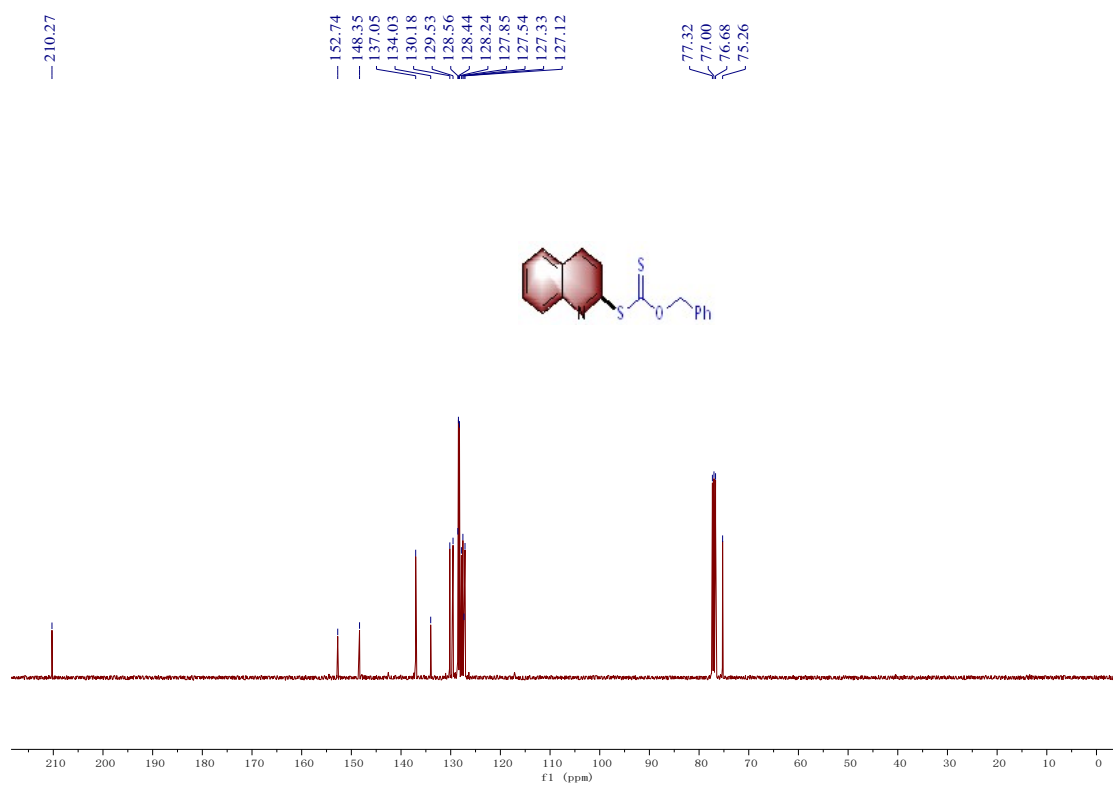

<sup>13</sup>C spectra of 3ag

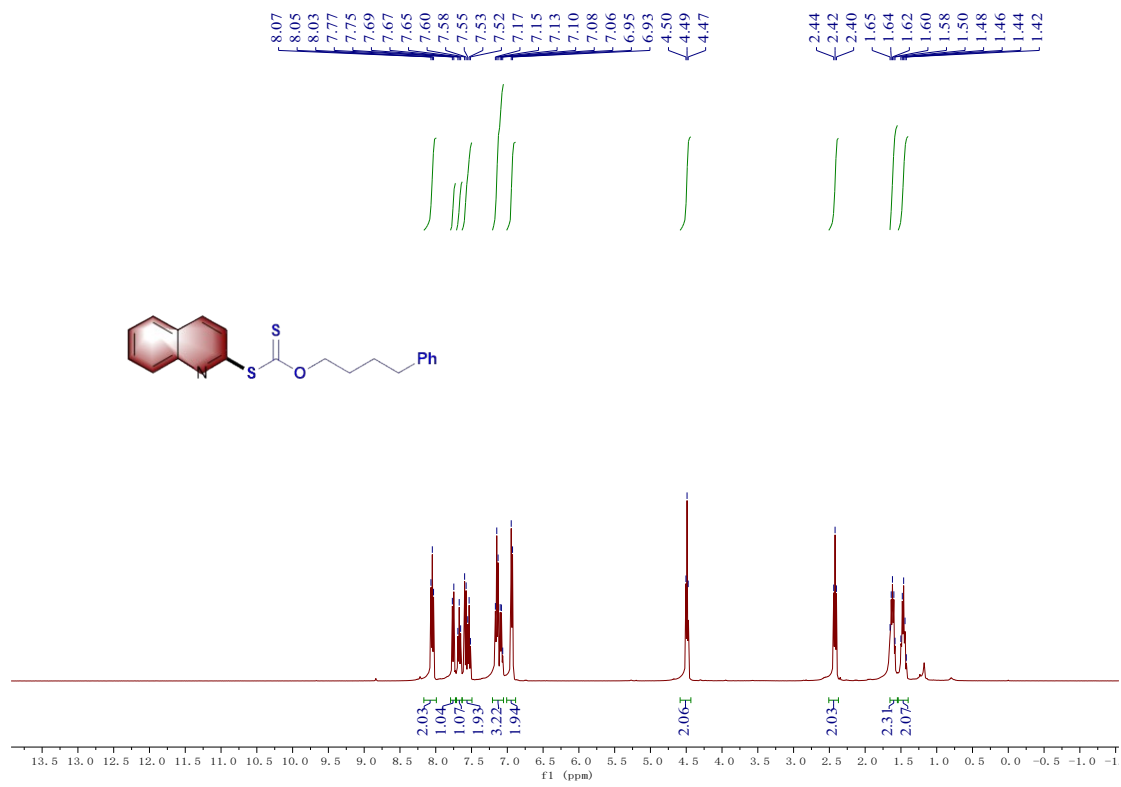

<sup>1</sup>H spectra of 3ah

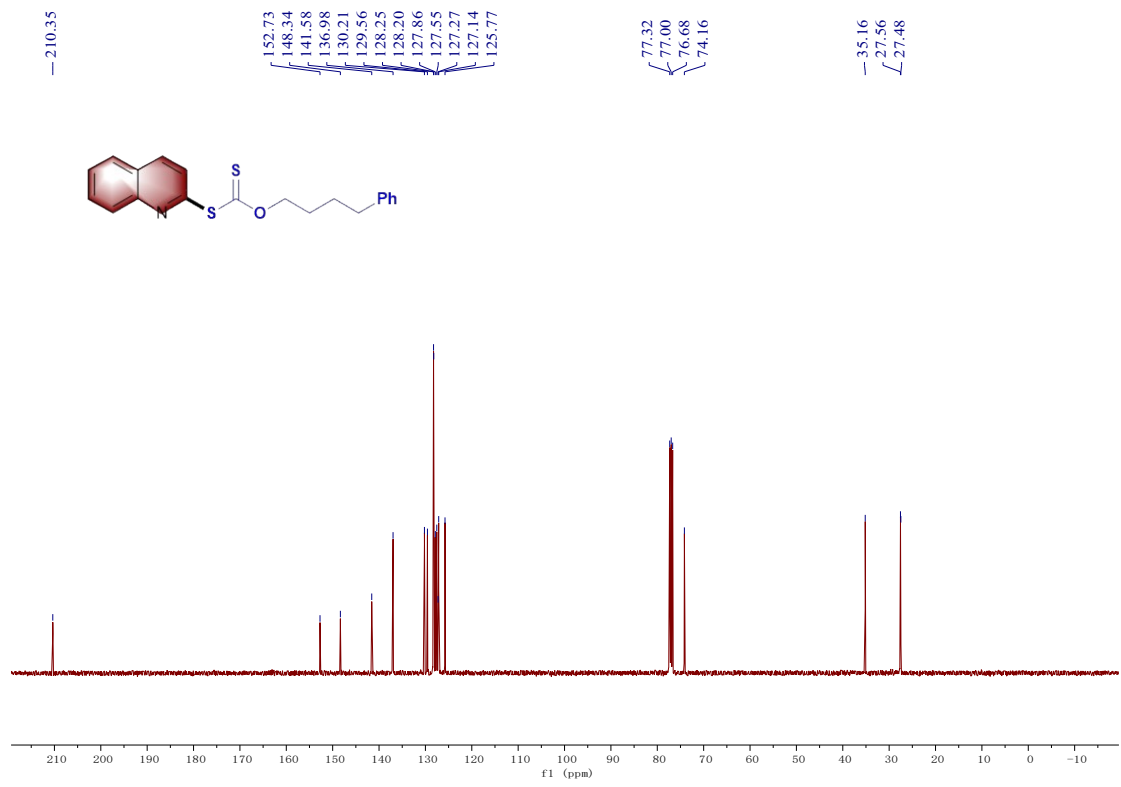

<sup>13</sup>C spectra of 3ah

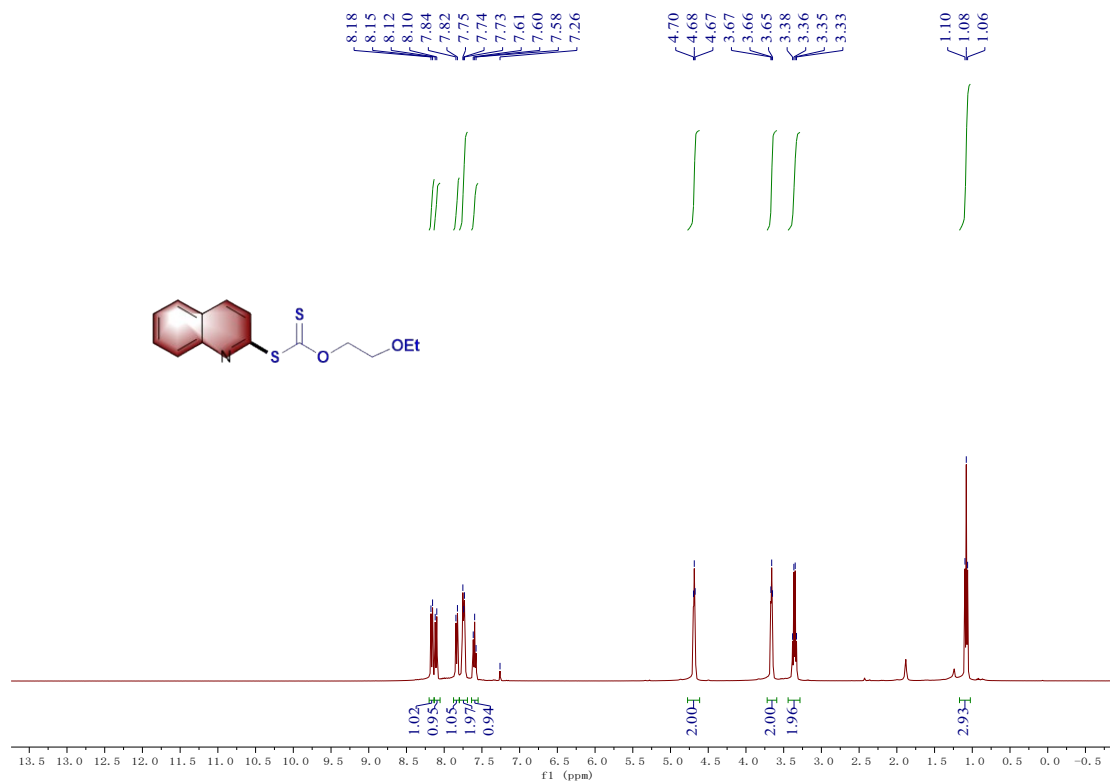

<sup>1</sup>H spectra of **3ai**

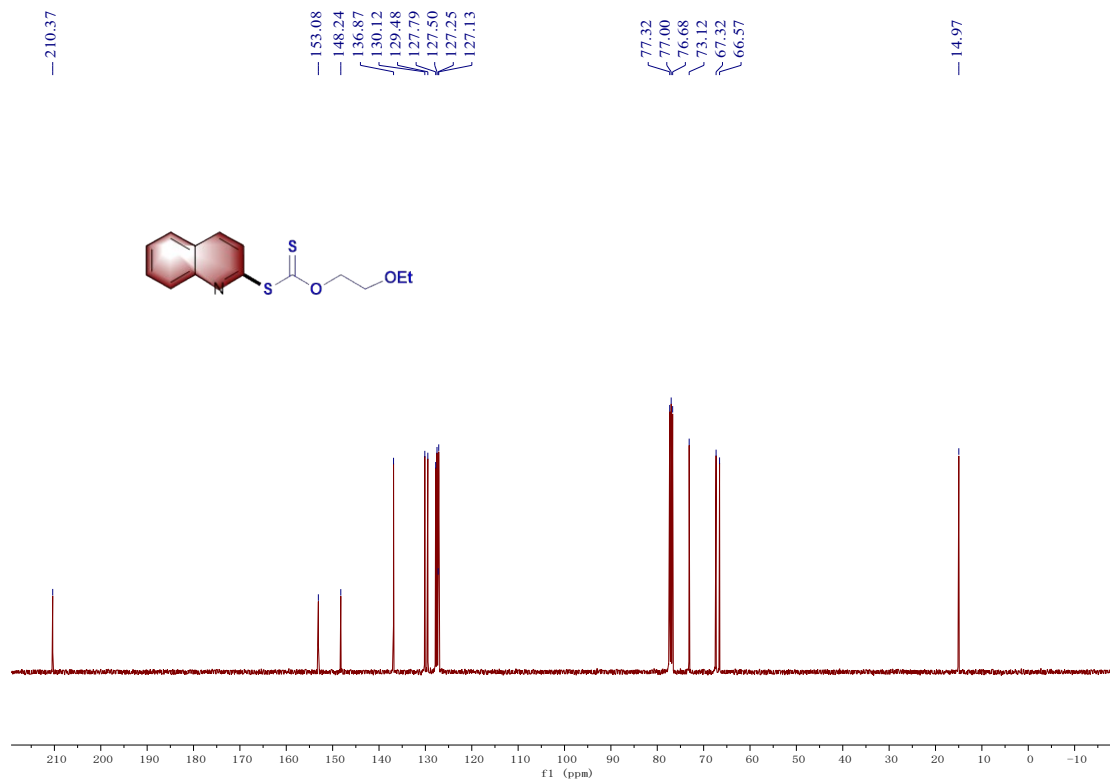

<sup>13</sup>C spectra of **3ai**

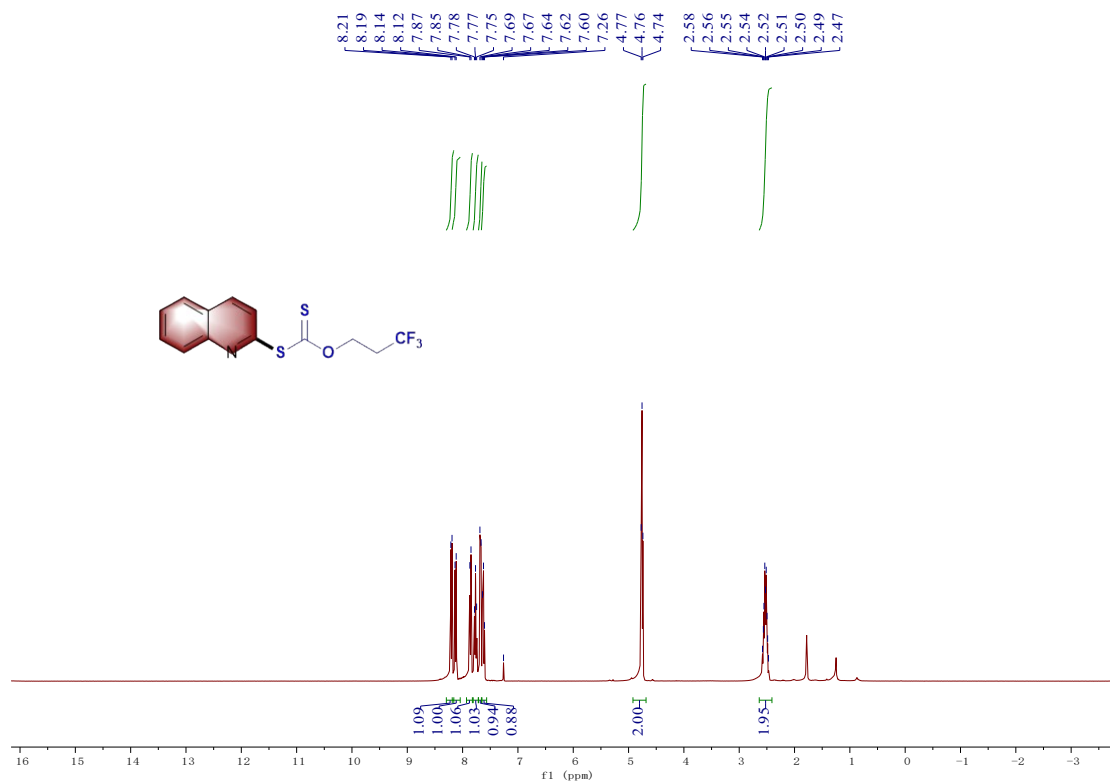

<sup>1</sup>H spectra of 3aj

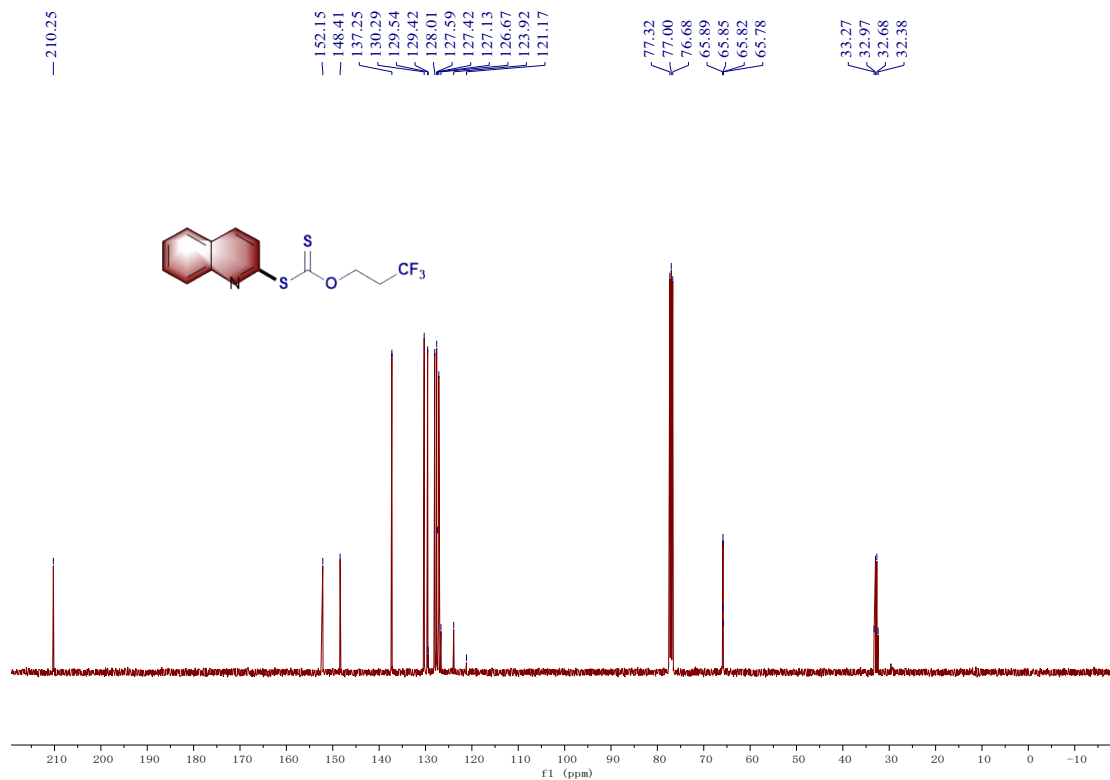

<sup>13</sup>C spectra of 3aj

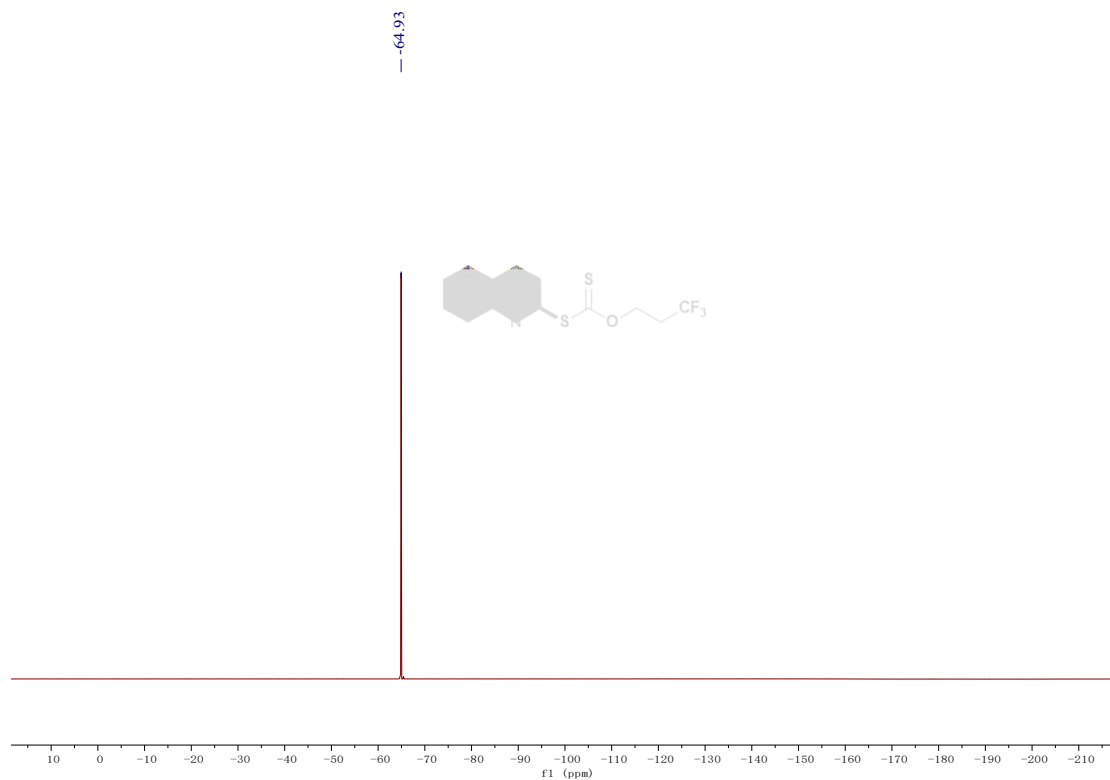

<sup>19</sup>F spectra of **3aj**

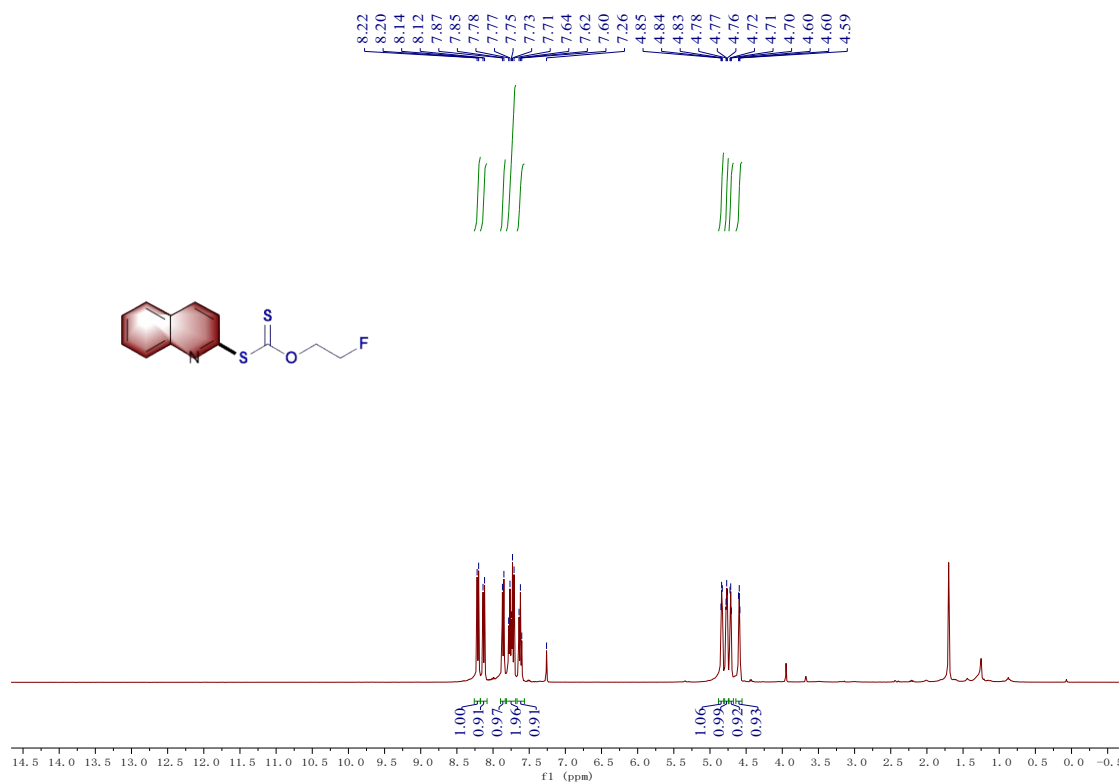

<sup>1</sup>H spectra of **3ak**

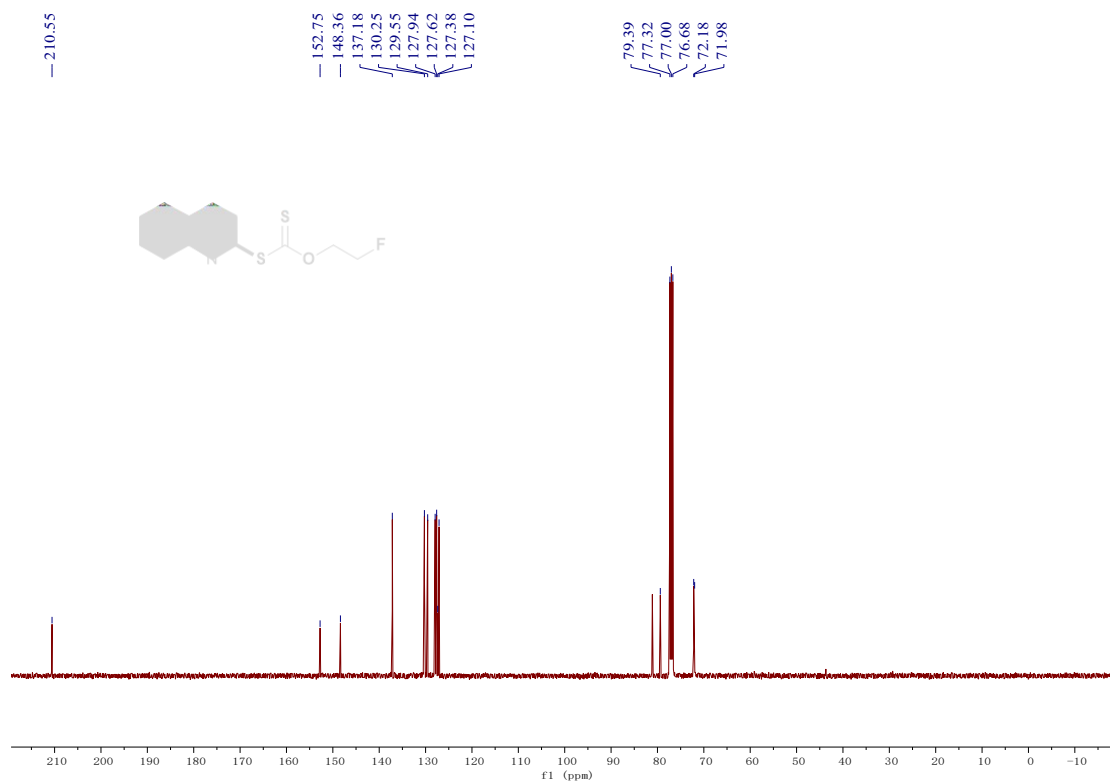

<sup>13</sup>C spectra of 3ak

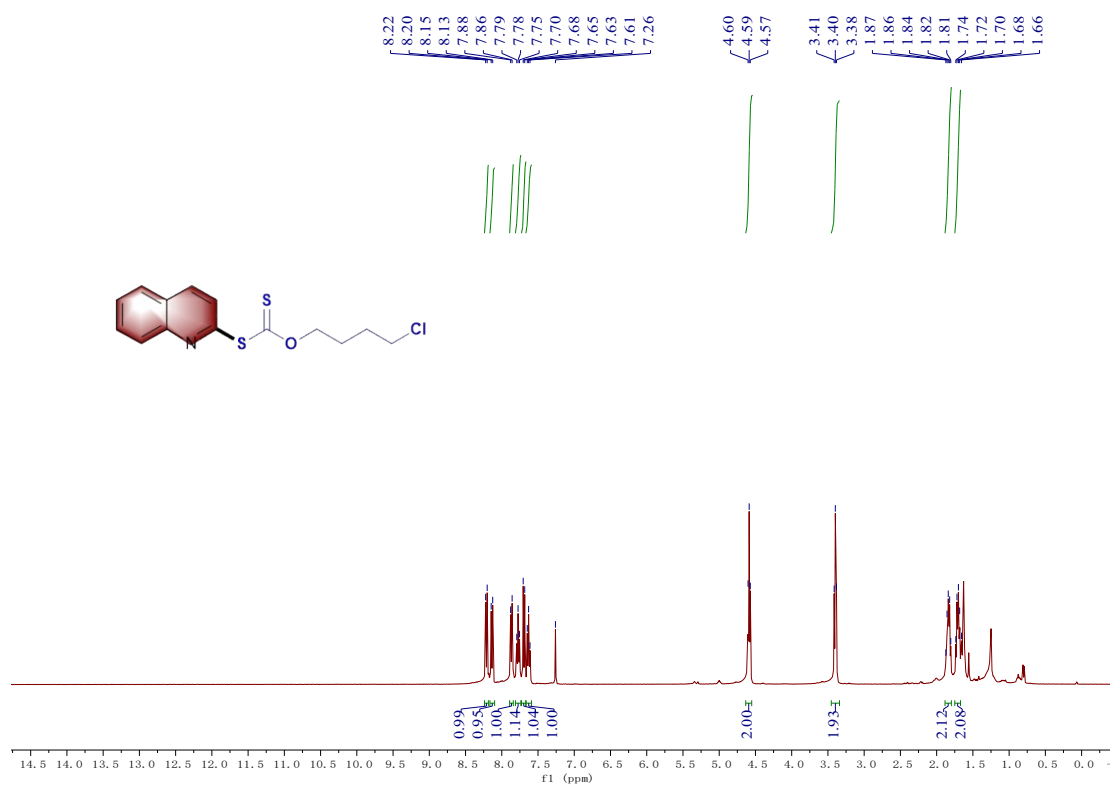

<sup>1</sup>H spectra of 3al



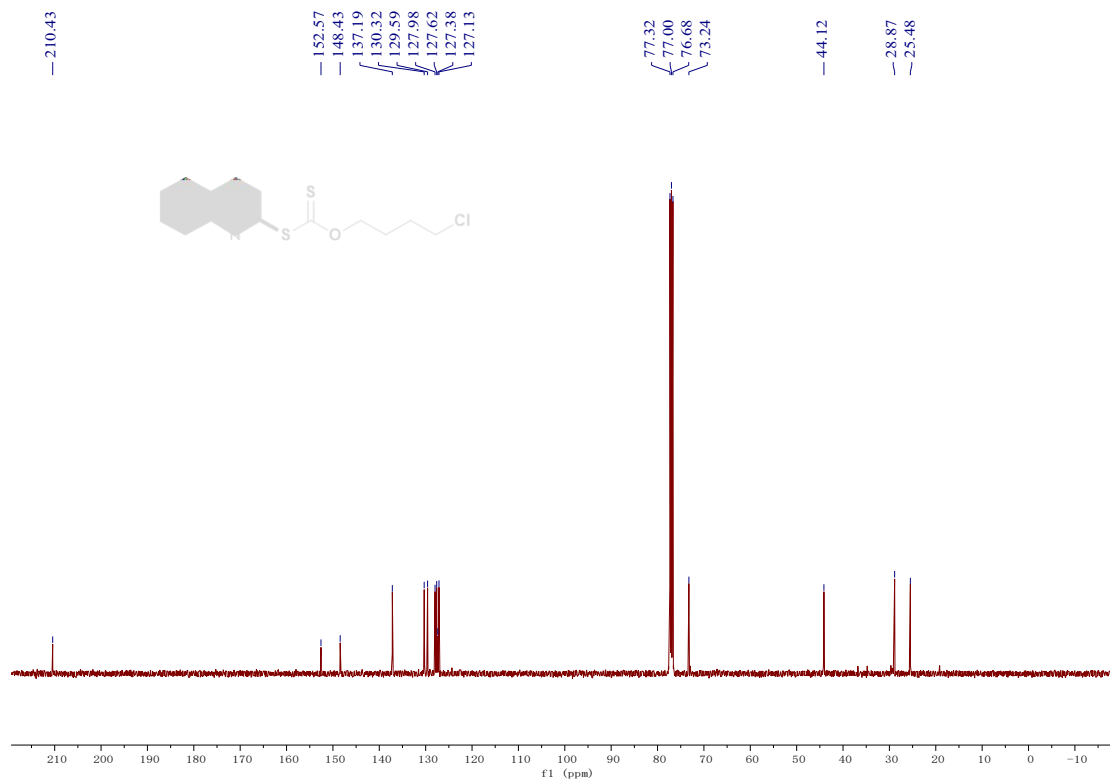

$^{13}\text{C}$  spectra of **3al**

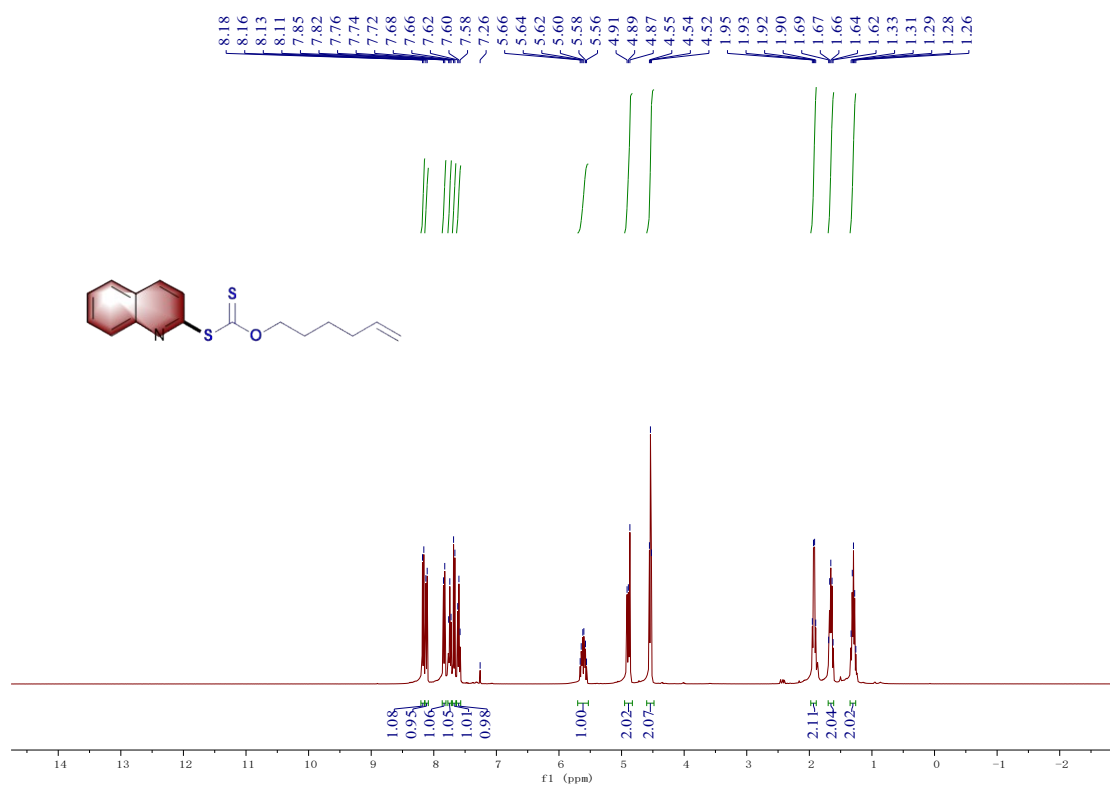

$^1\text{H}$  spectra of **3am**

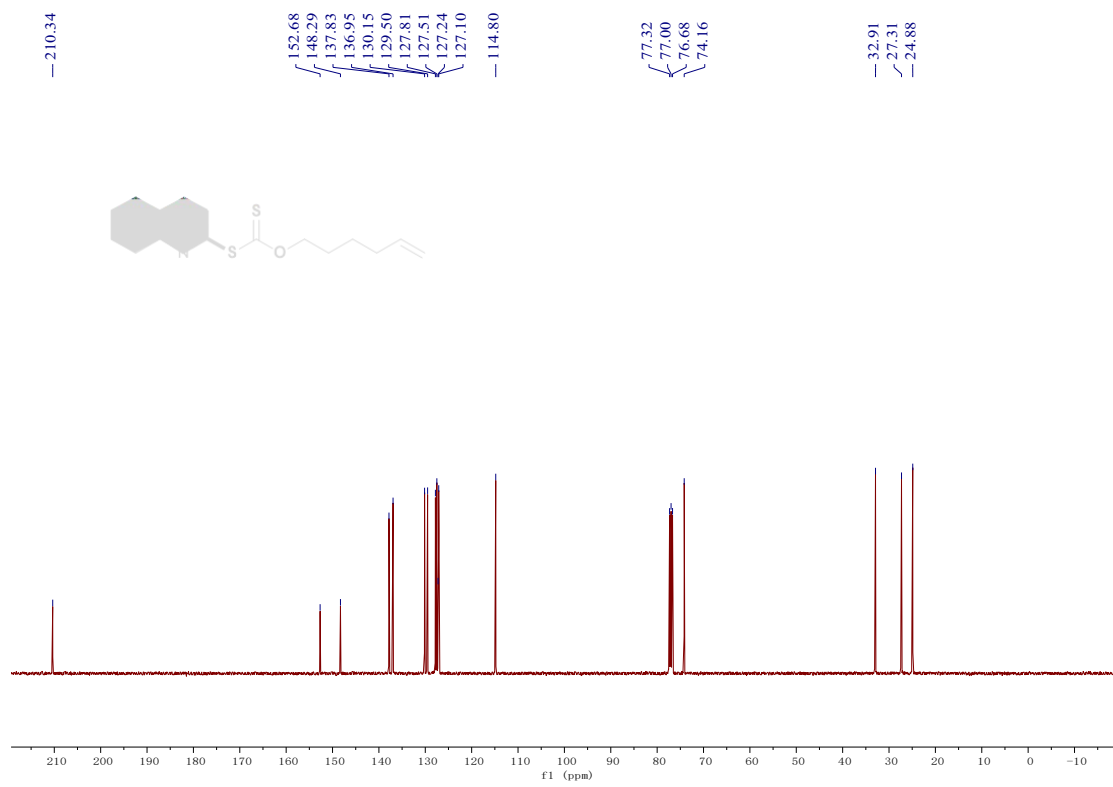

<sup>13</sup>C spectra of **3am**

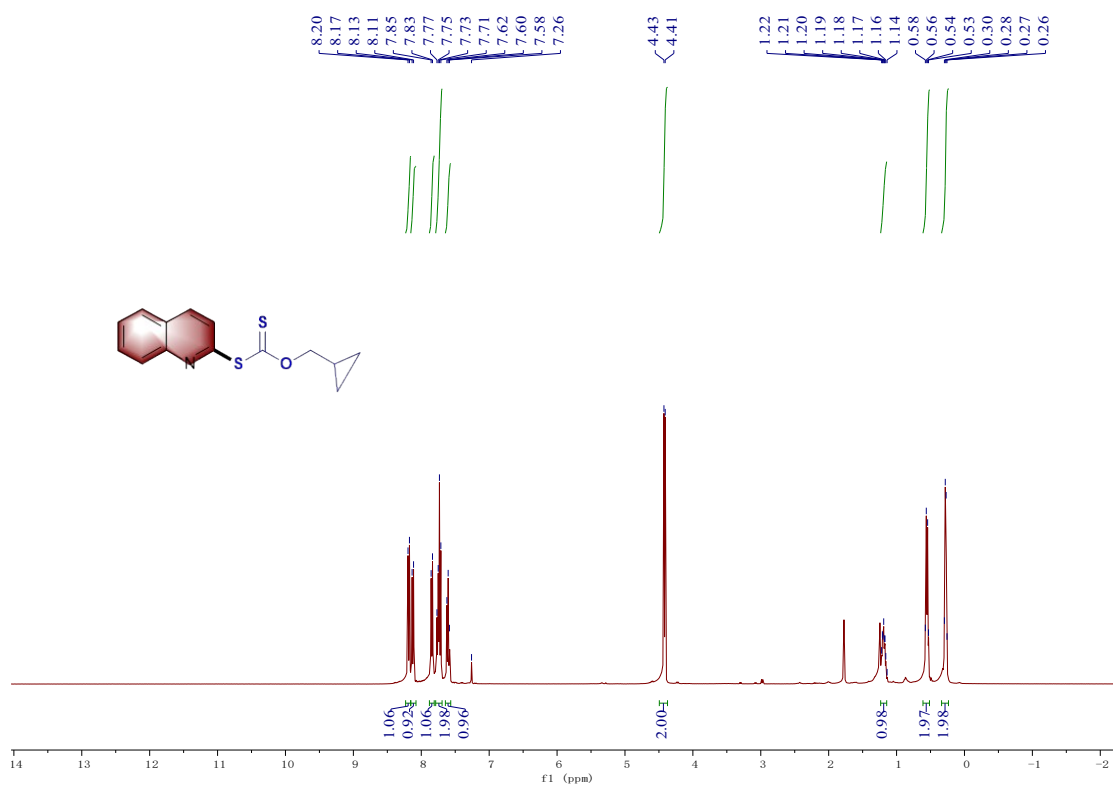

<sup>1</sup>H spectra of **3am**

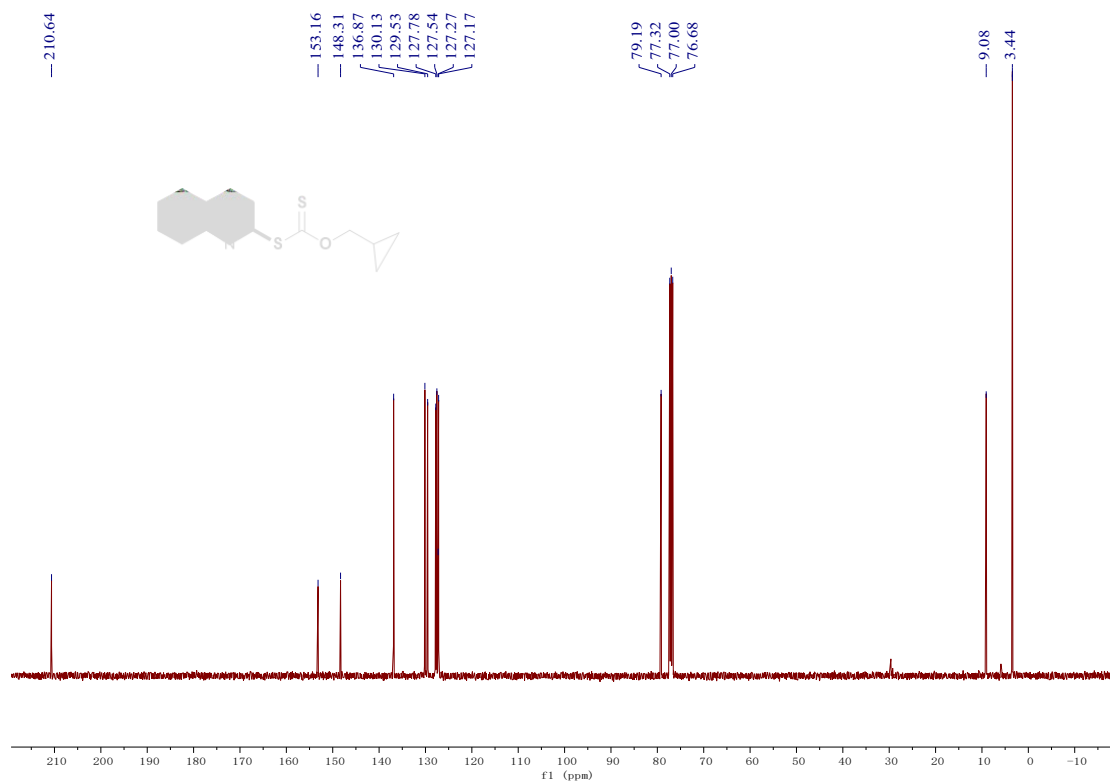

$^{13}\text{C}$  spectra of 3an

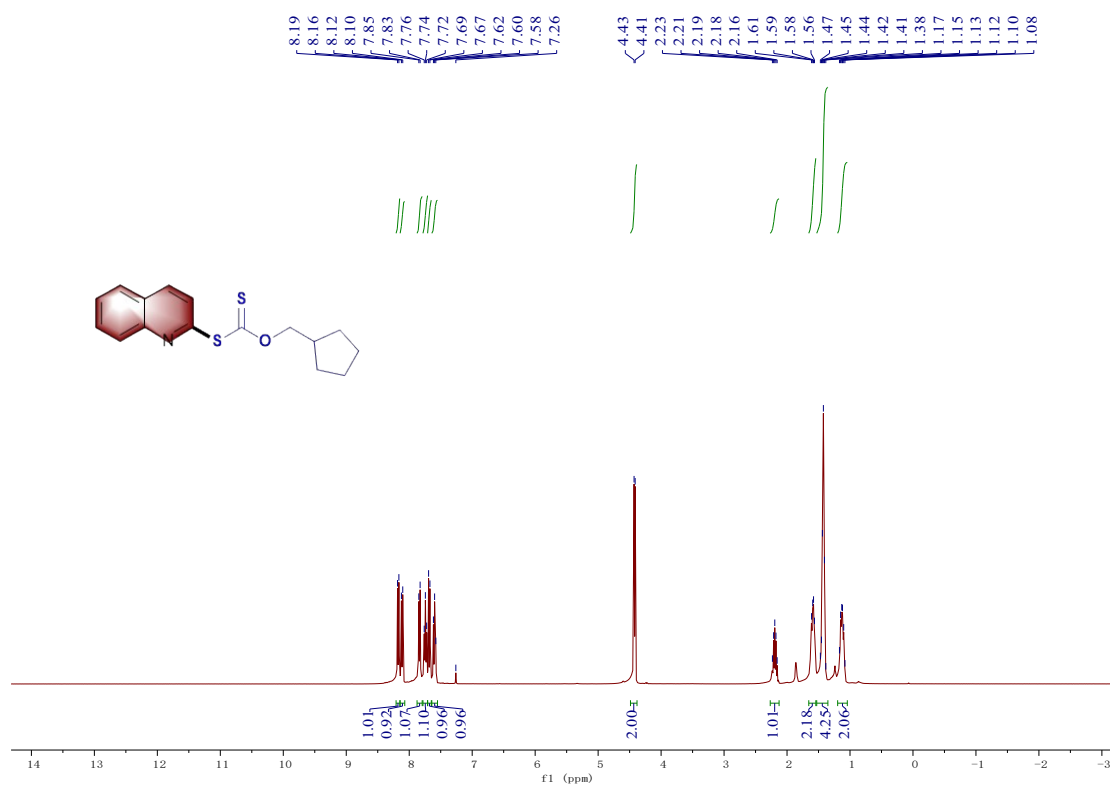

$^1\text{H}$  spectra of 3ao

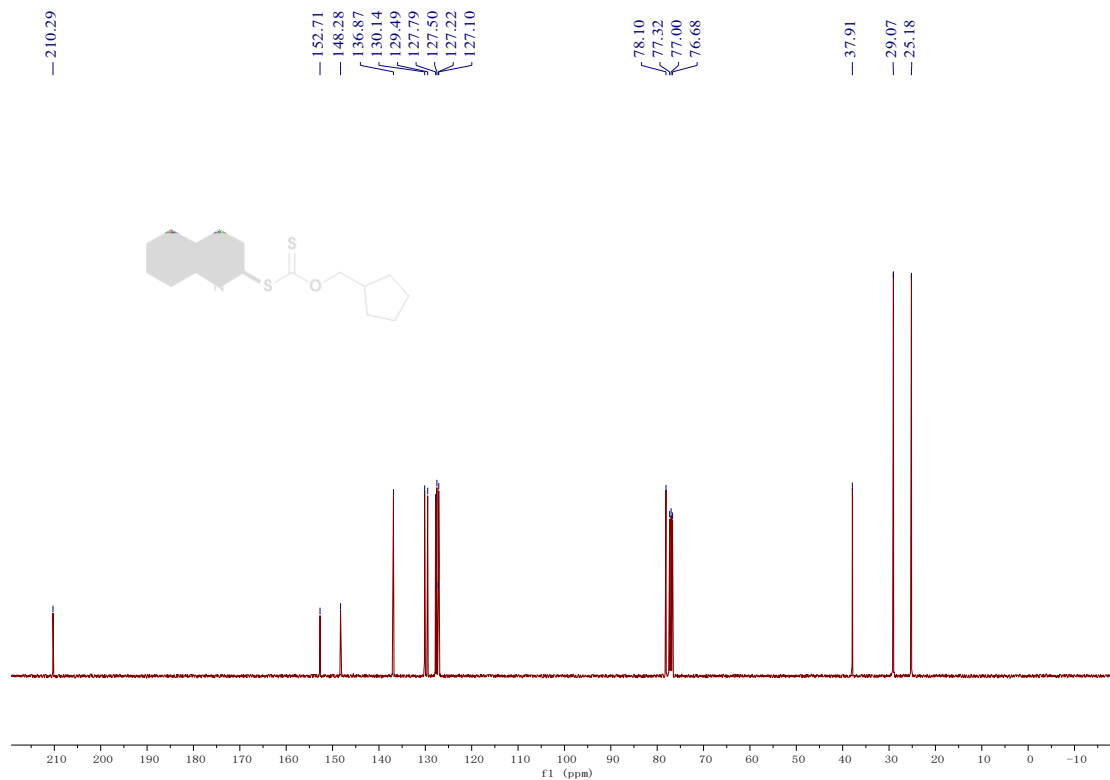

$^{13}\text{C}$  spectra of **3ao**

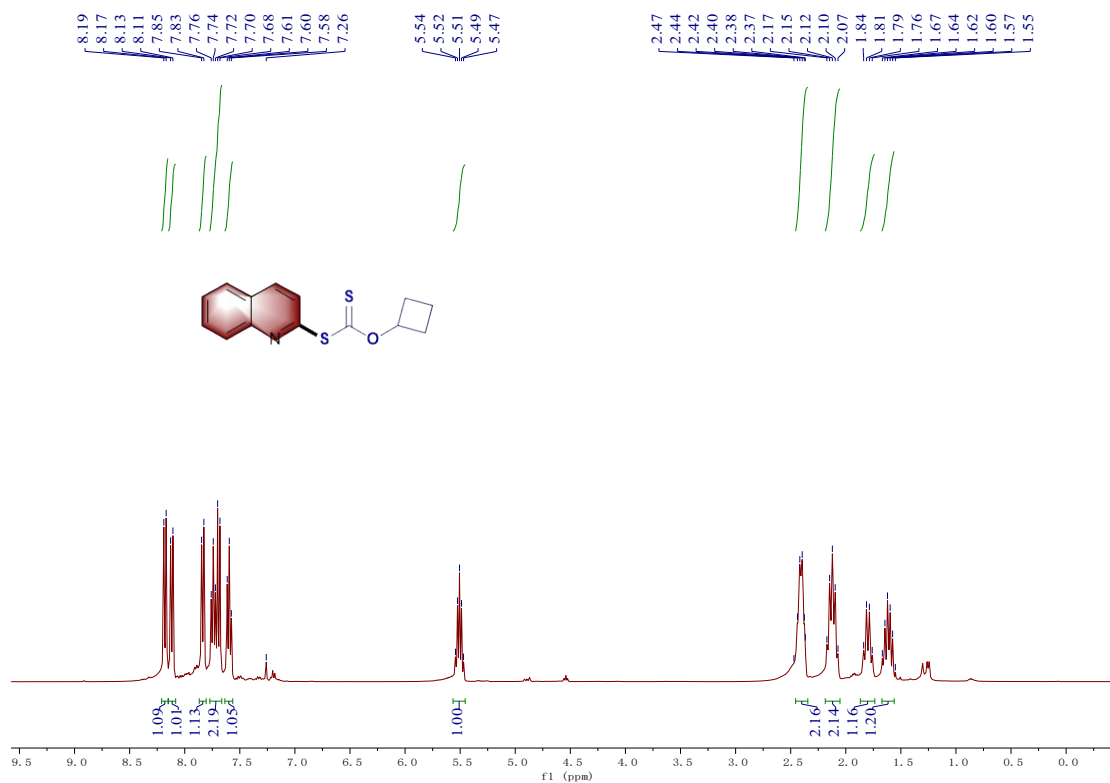

$^1\text{H}$  spectra of **3ap**

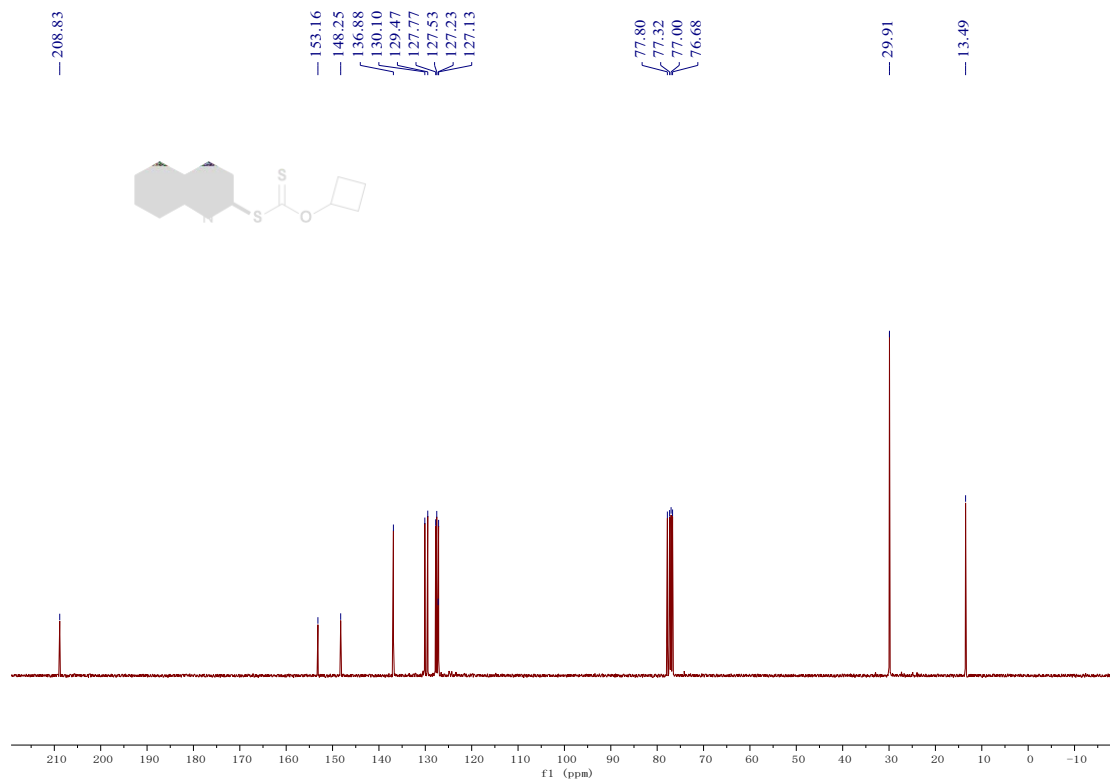

$^{13}\text{C}$  spectra of 3ap

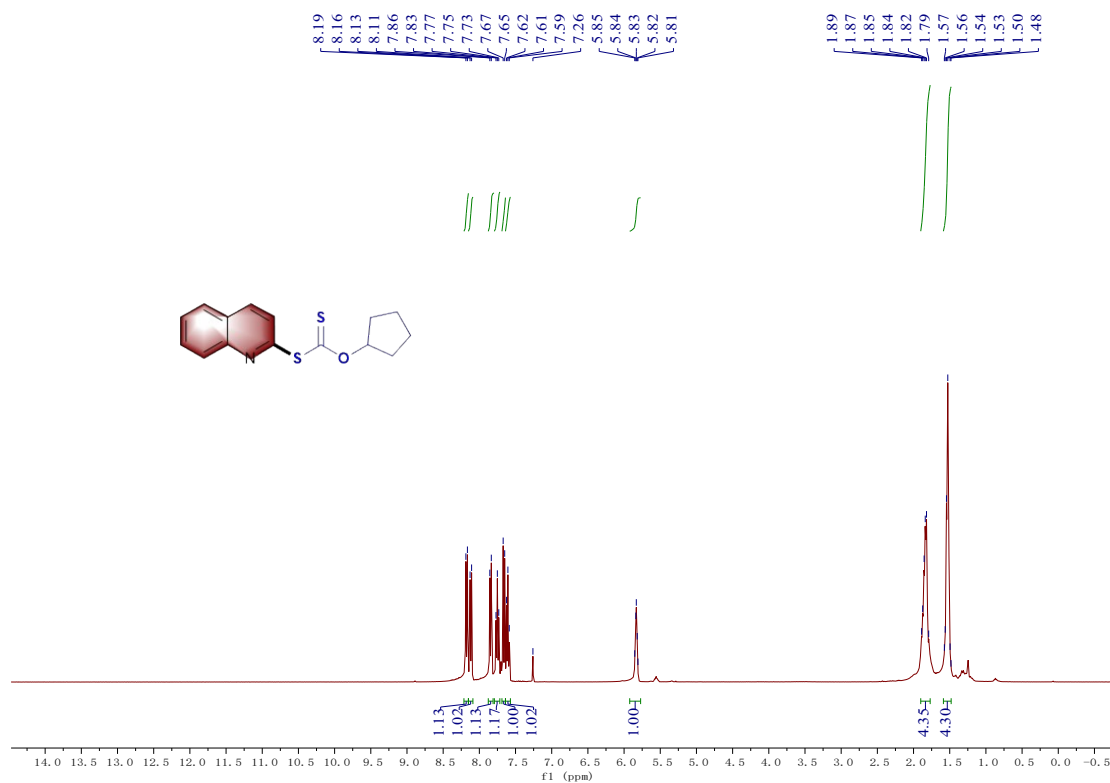

$^1\text{H}$  spectra of 3aq

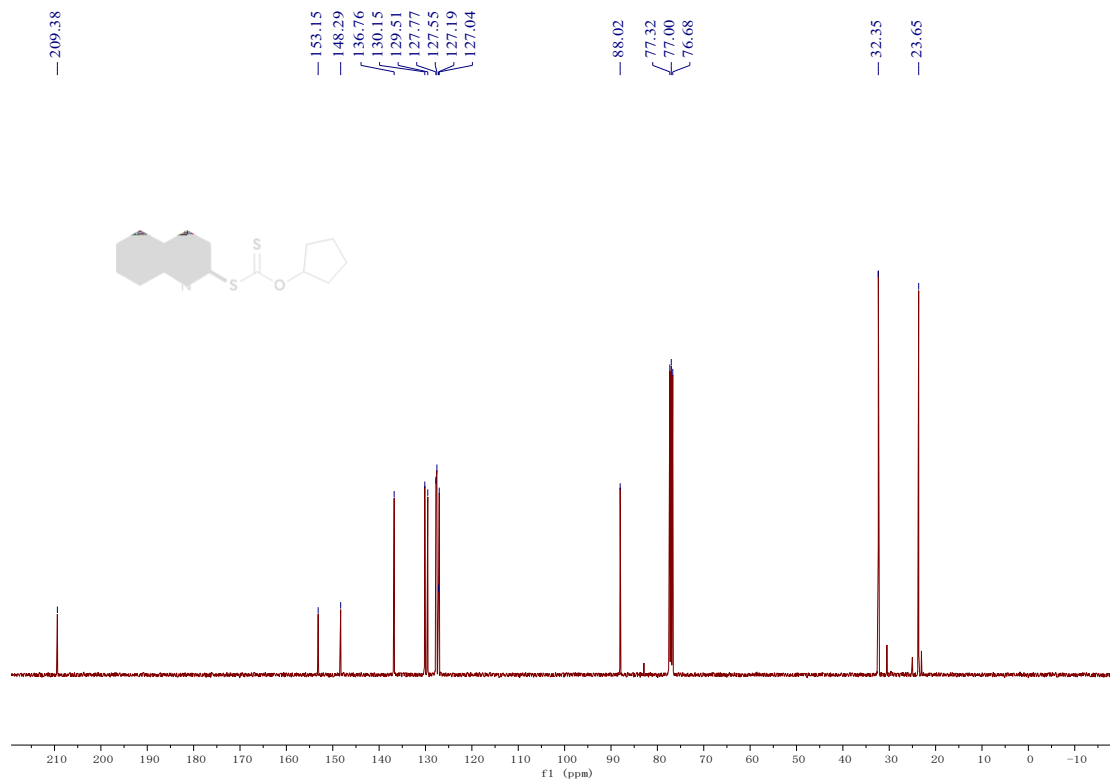

$^{13}\text{C}$  spectra of 3aq

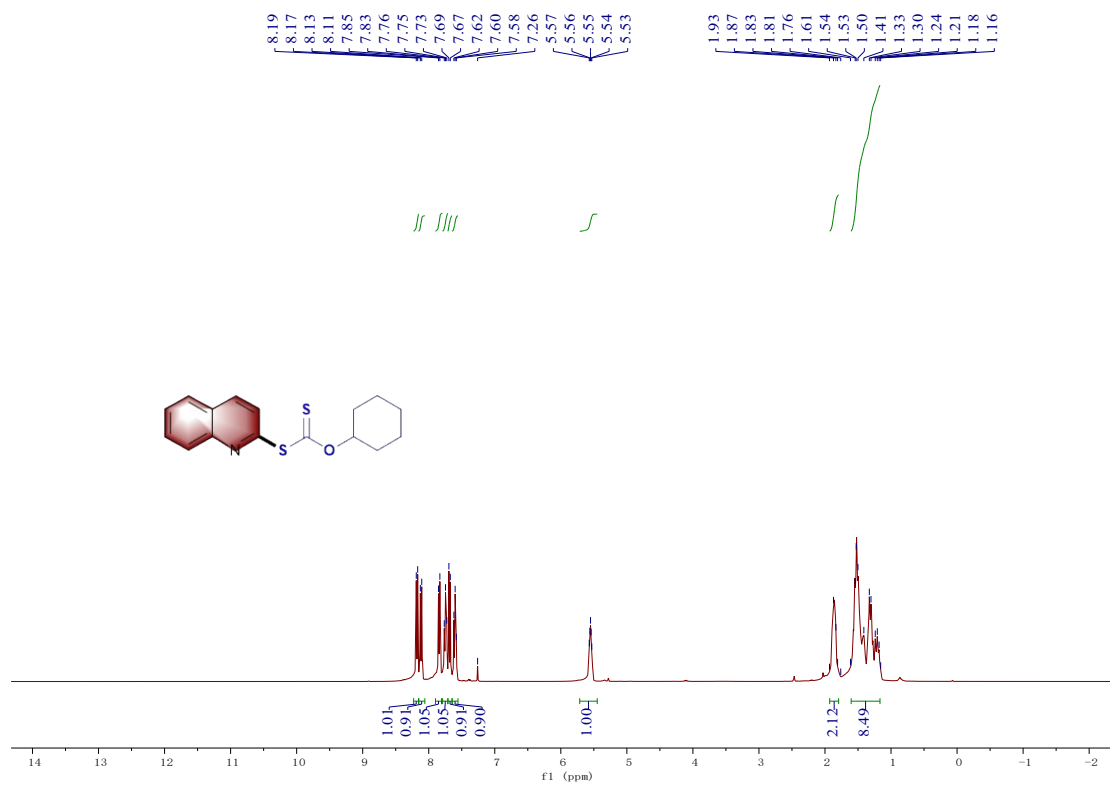

$^1\text{H}$  spectra of 3ar

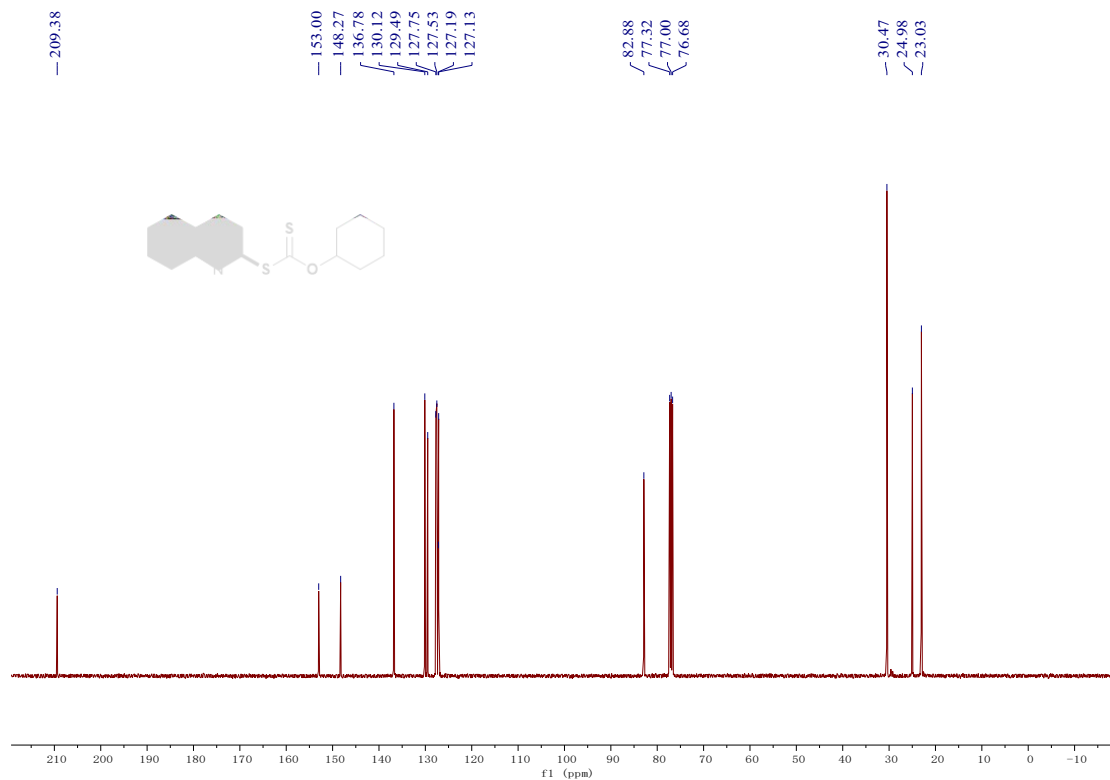

$^{13}\text{C}$  spectra of 3ar

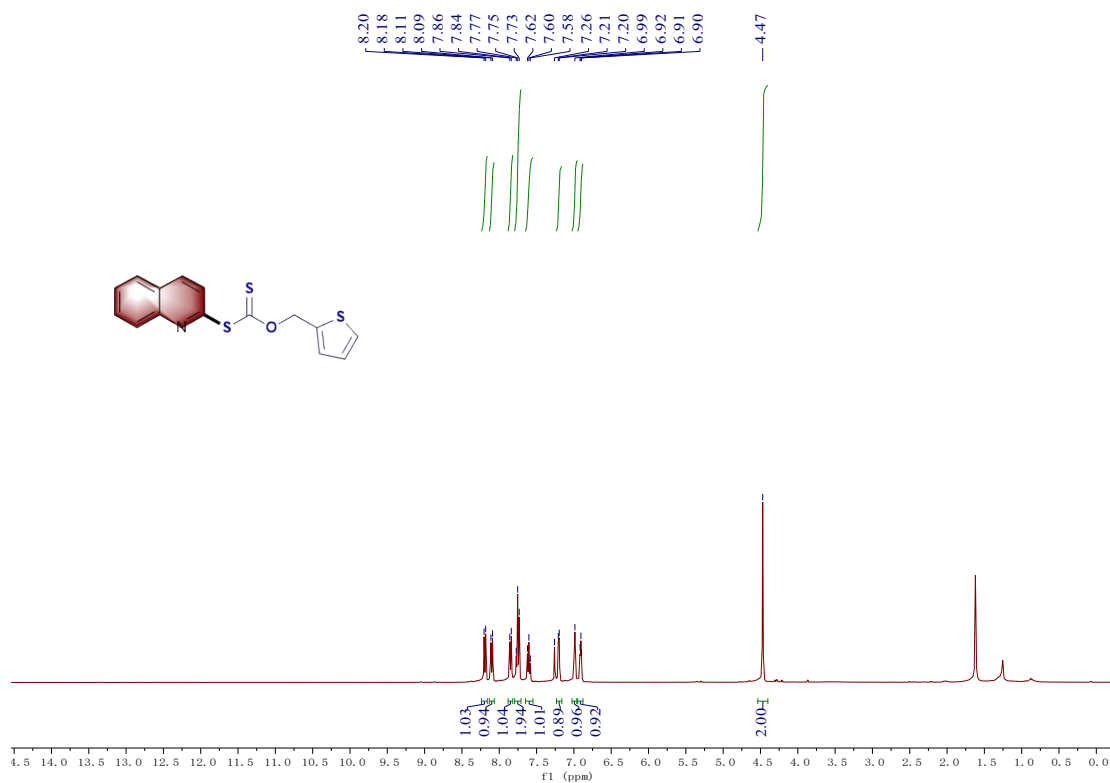

$^1\text{H}$  spectra of 3as

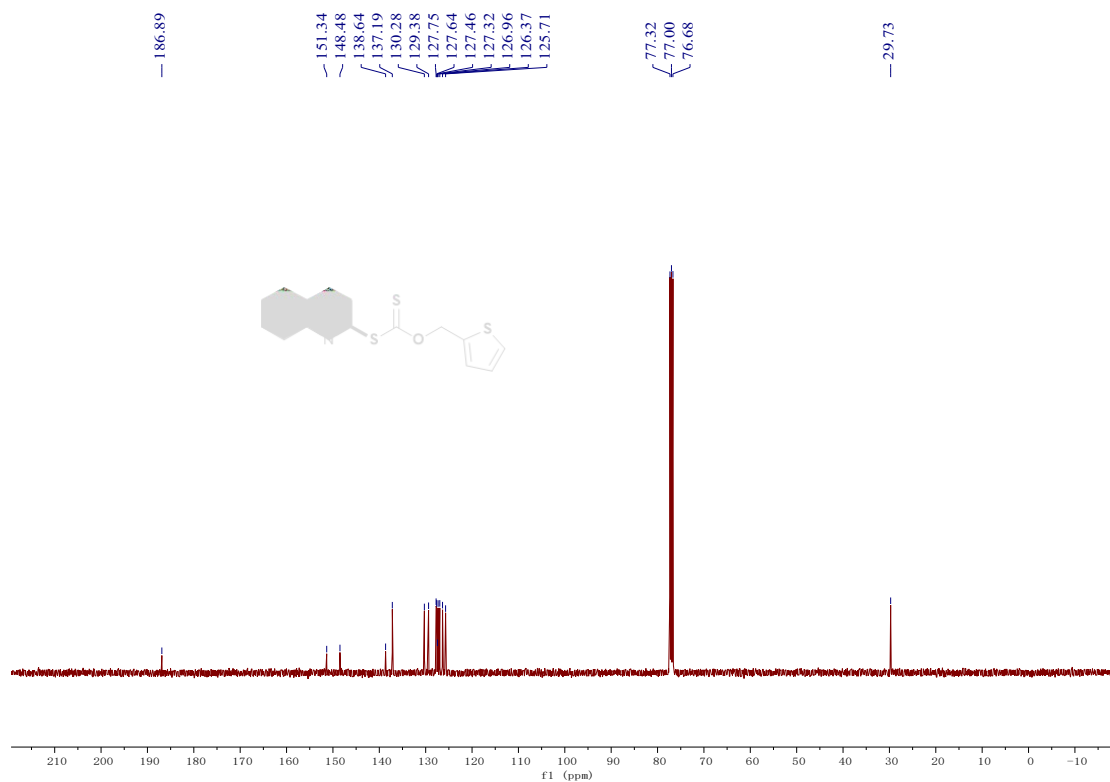

$^{13}\text{C}$  spectra of 3as

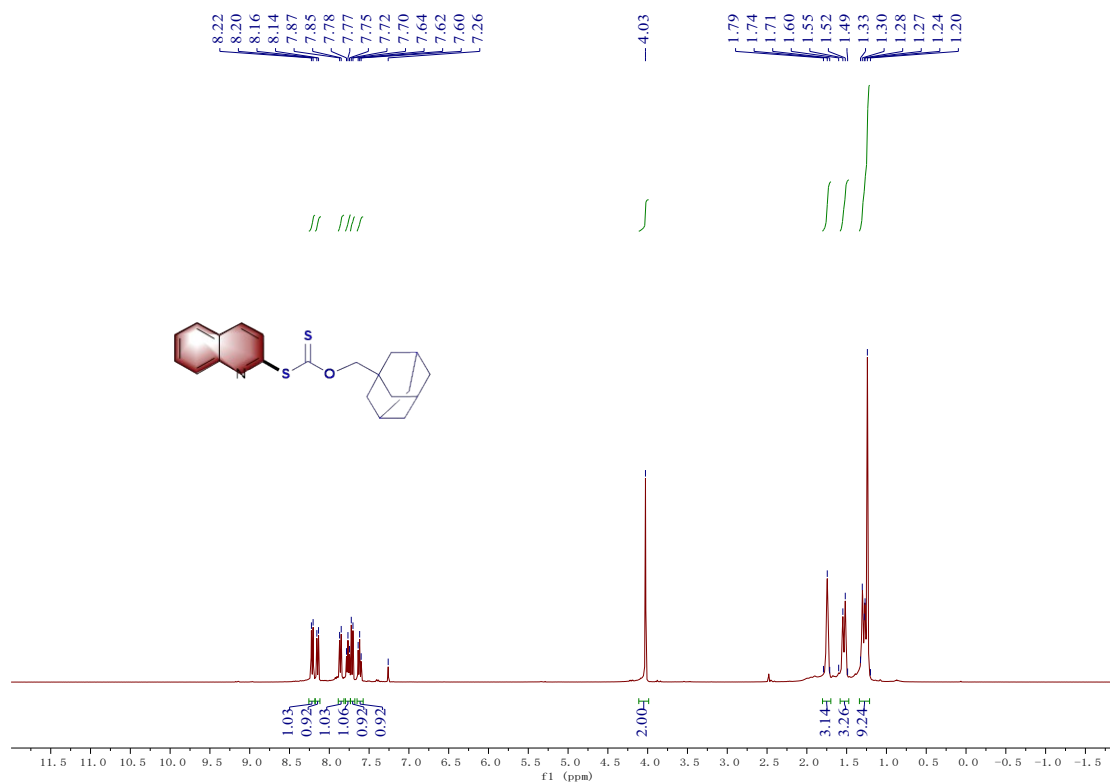

$^1\text{H}$  spectra of 3at



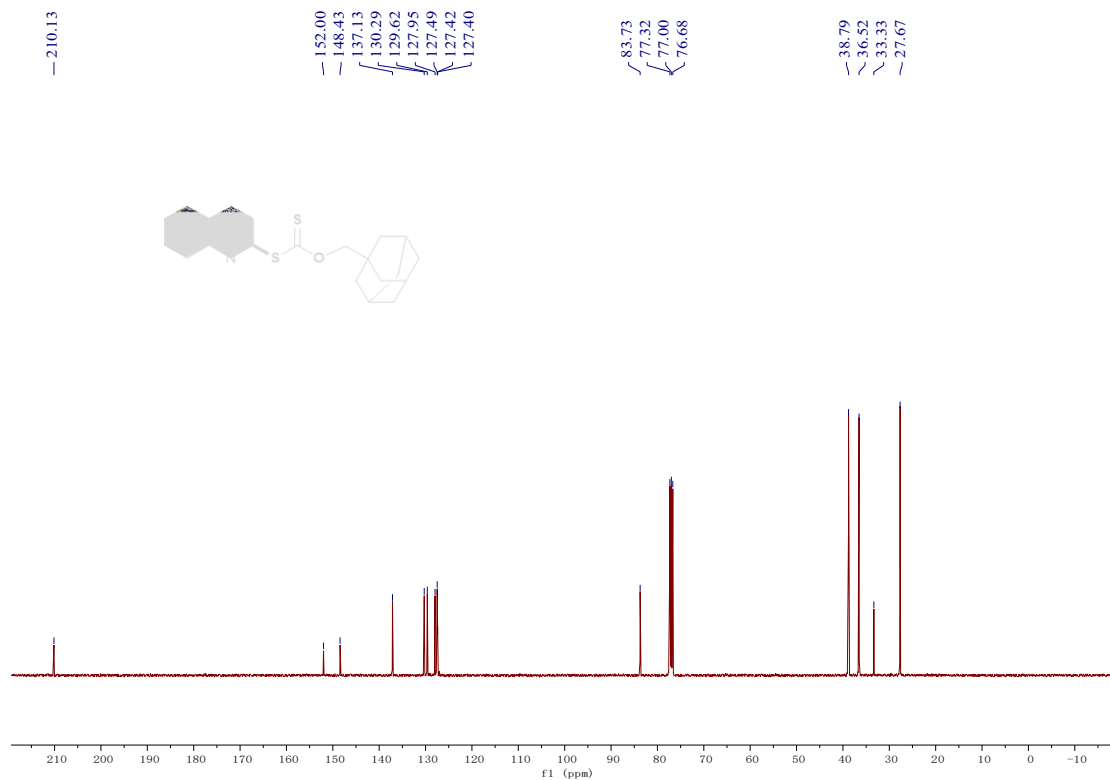

$^{13}\text{C}$  spectra of **3at**

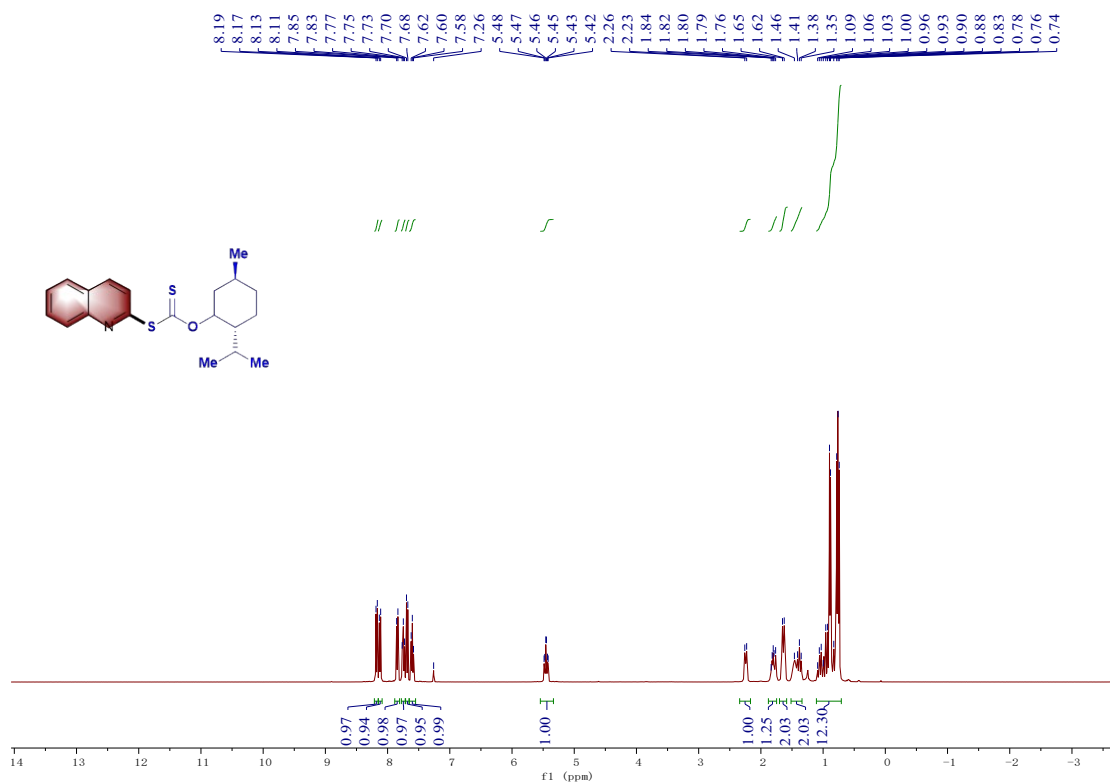

$^1\text{H}$  spectra of **3au**

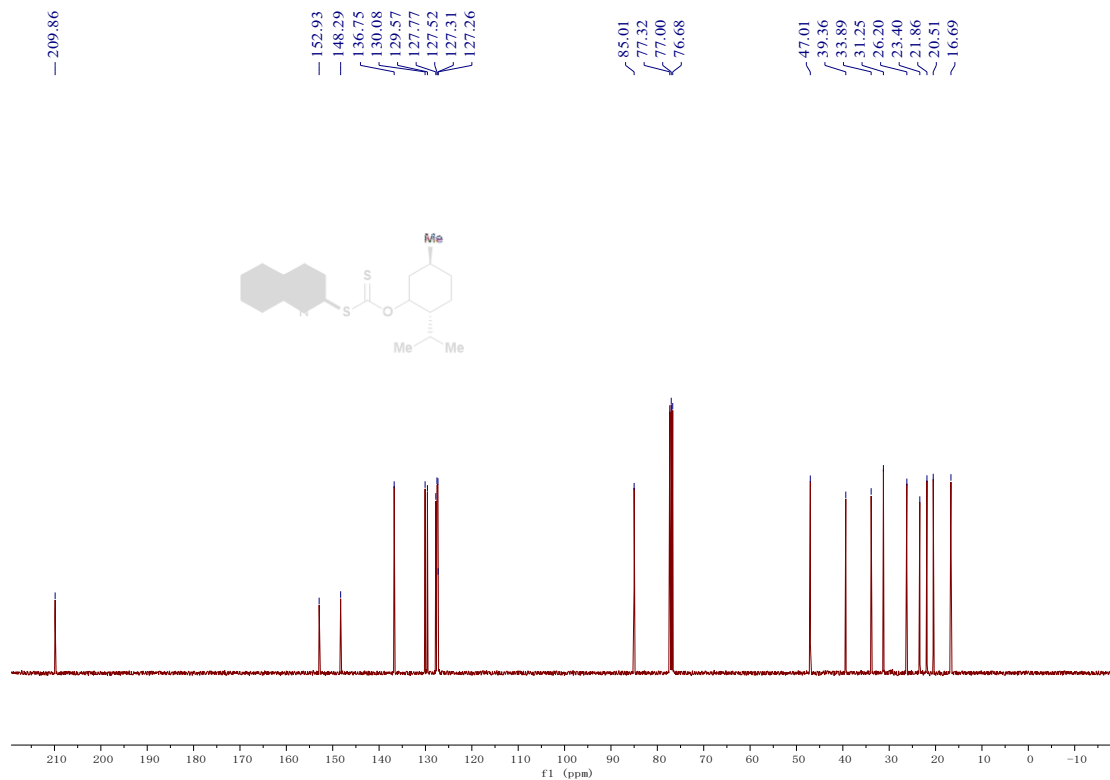

$^{13}\text{C}$  spectra of **3au**

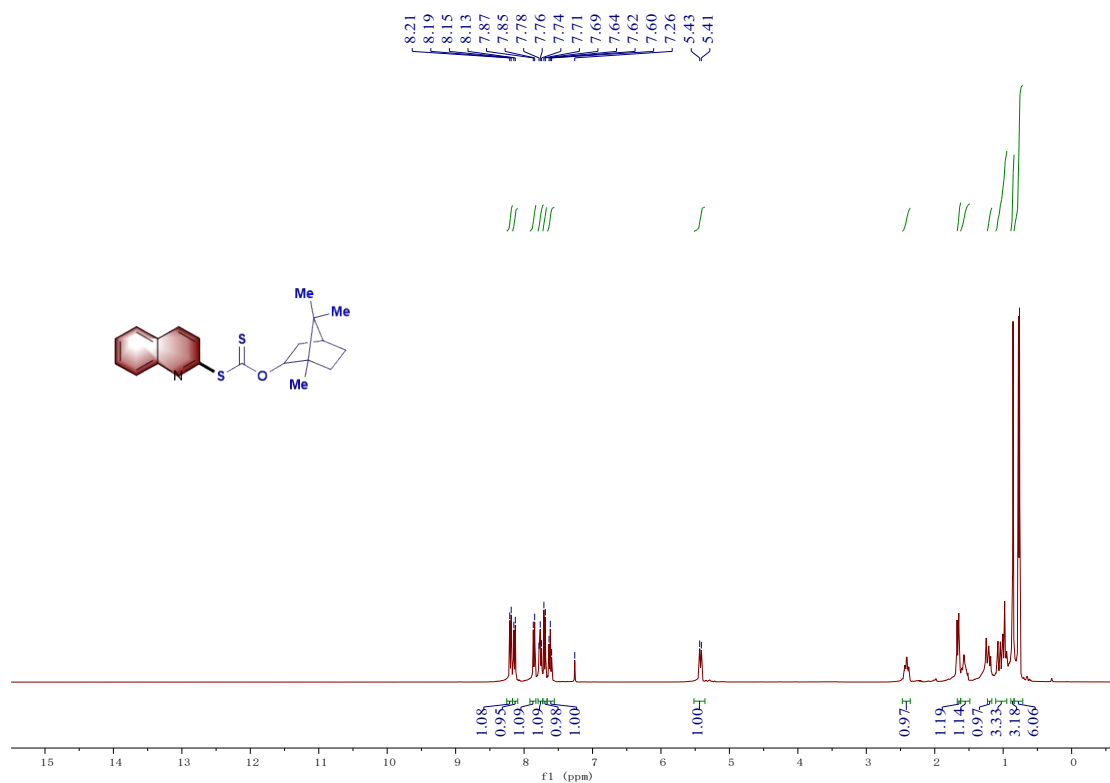

$^1\text{H}$  spectra of **3av**

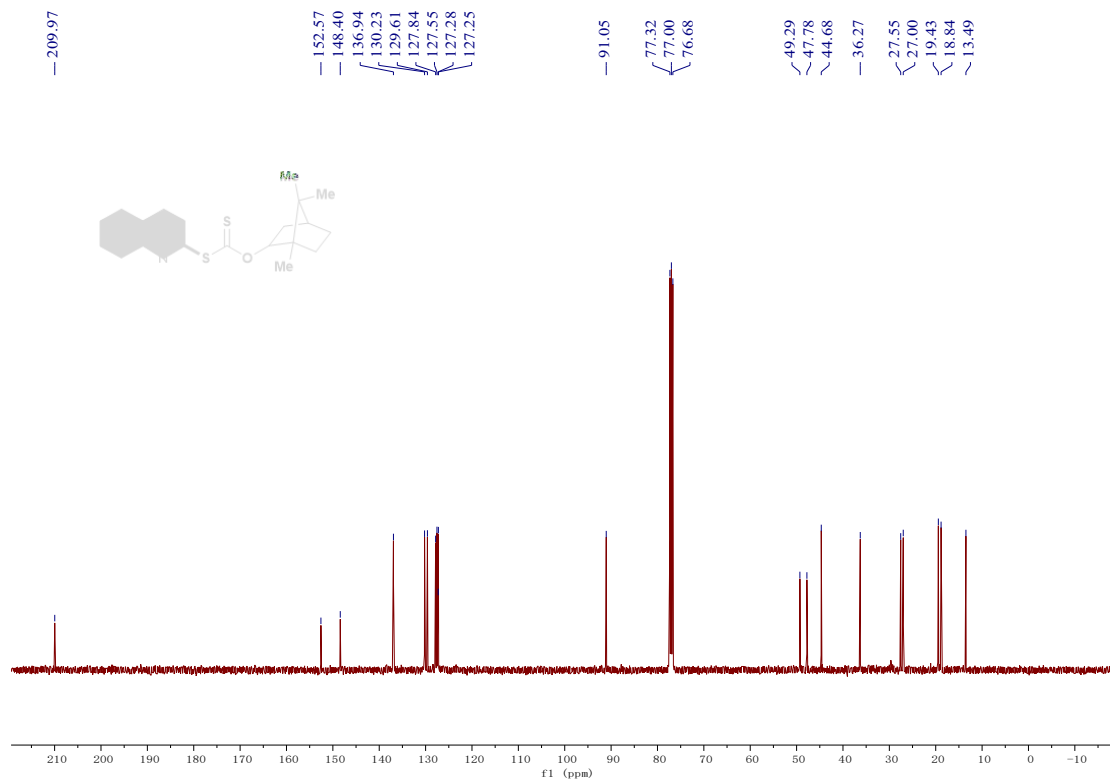

$^{13}\text{C}$  spectra of **3av**

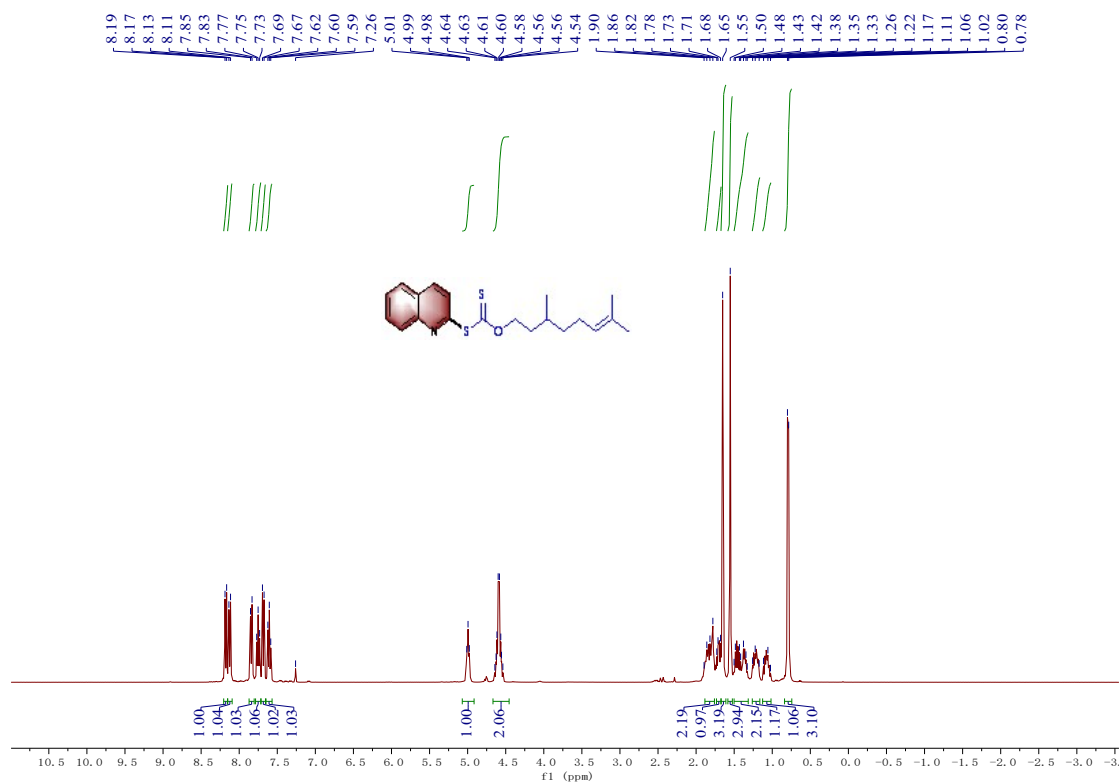

$^1\text{H}$  spectra of **3aw**

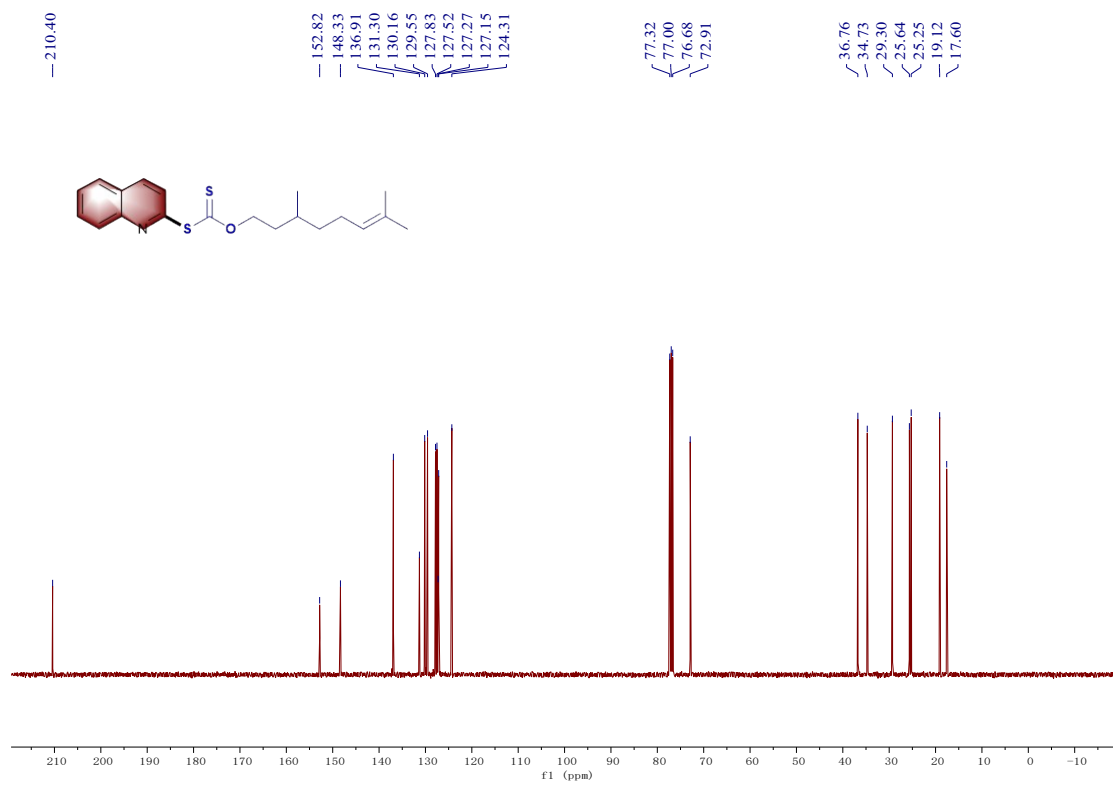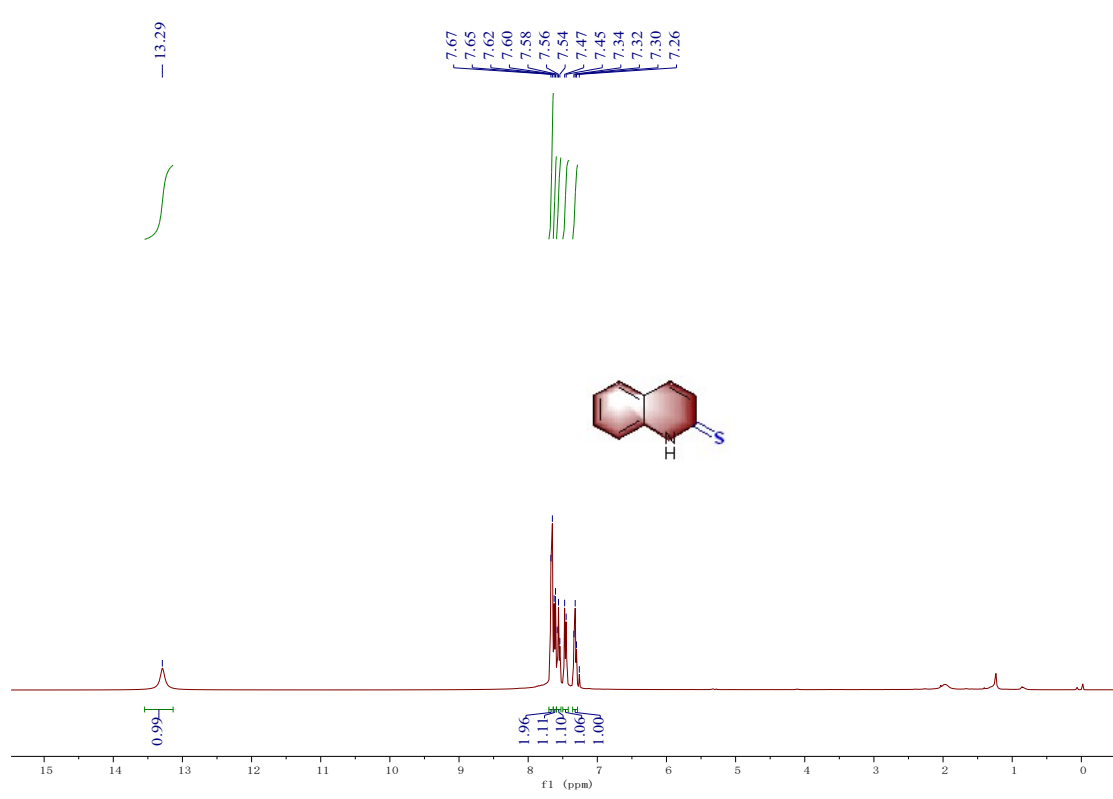

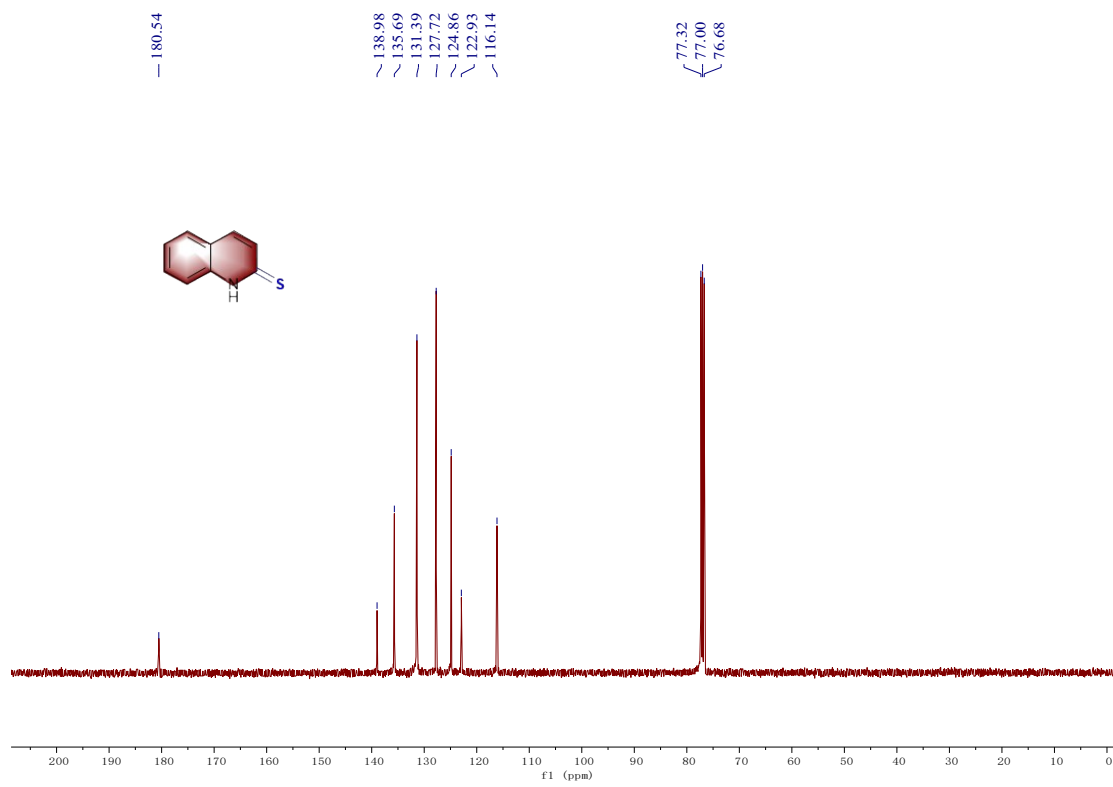

$^{13}\text{C}$  spectra of 4a

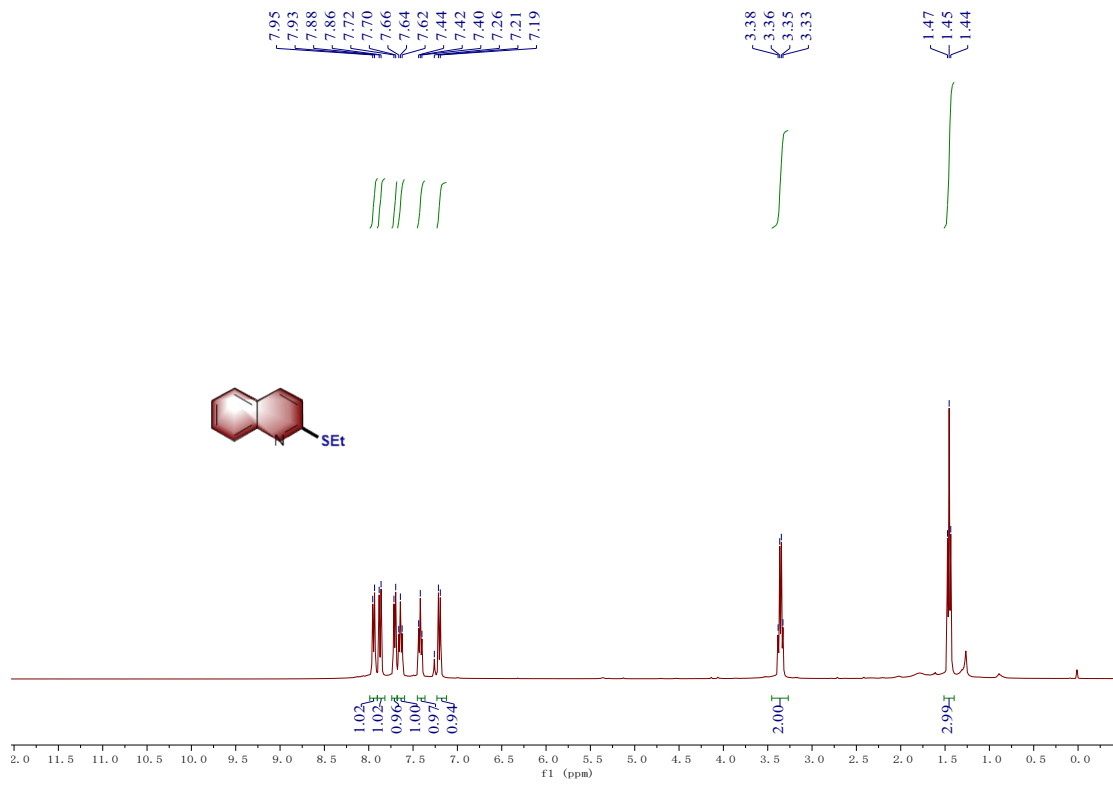

$^1\text{H}$  spectra of 5a

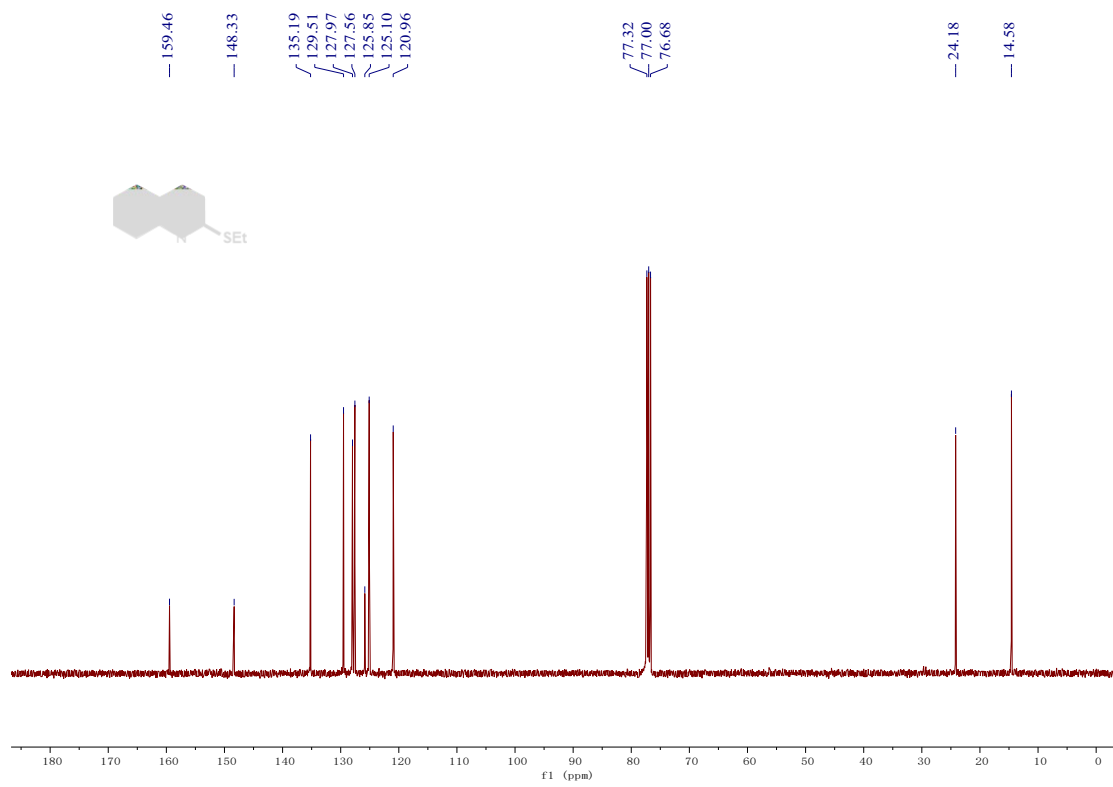

<sup>13</sup>C spectra of 5a

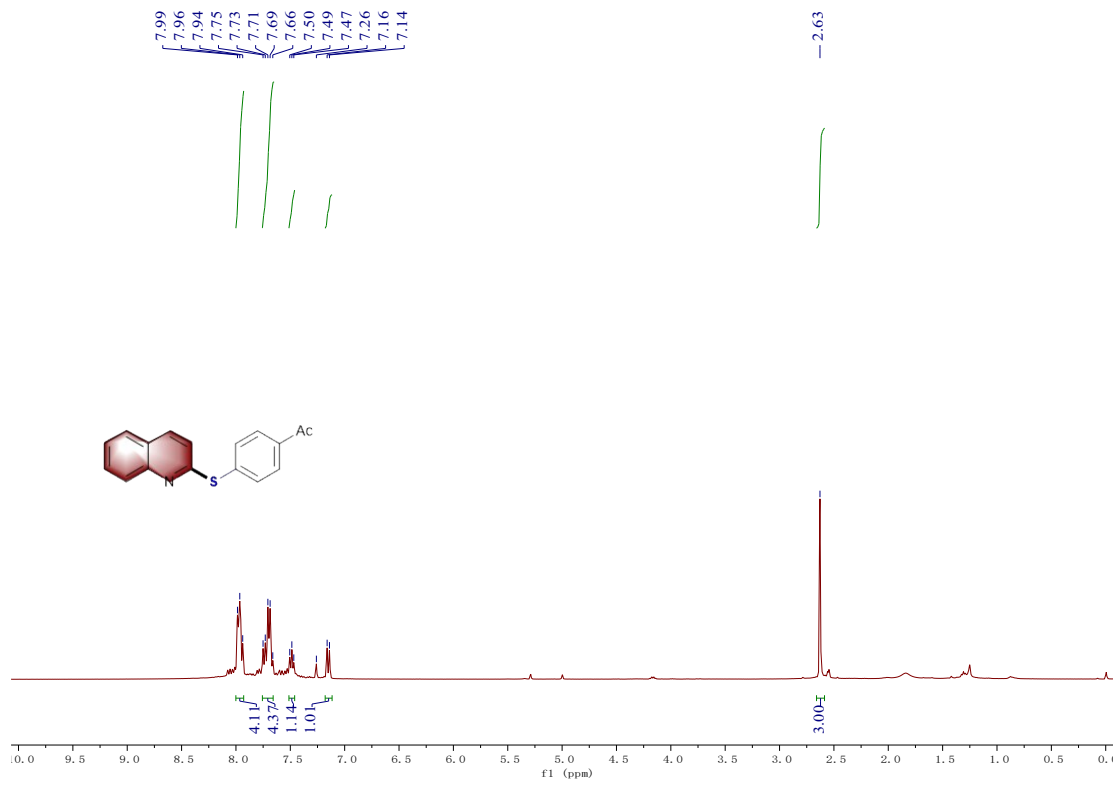

<sup>1</sup>H spectra of 6a

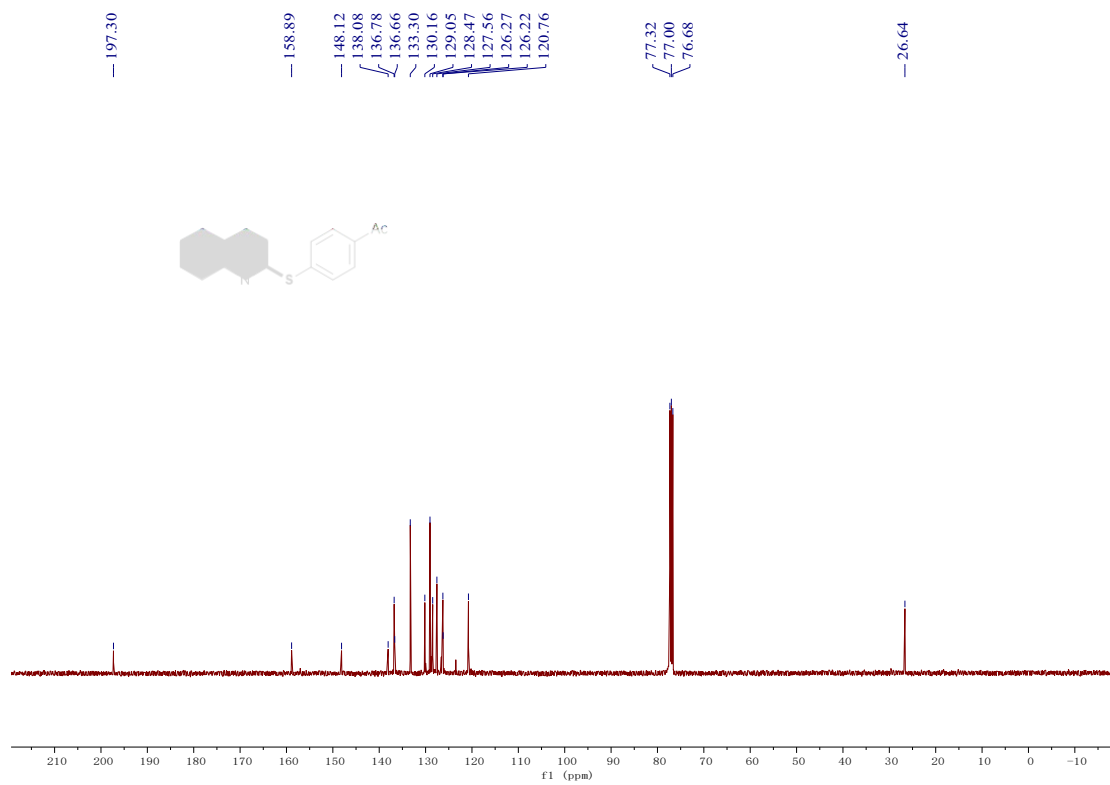

$^{13}\text{C}$  spectra of **6a**
